# Supplementary material
Source: PubMed Central journal article supplement (PMC6054540)

Figure 1B

protein ladder

Hepcidin

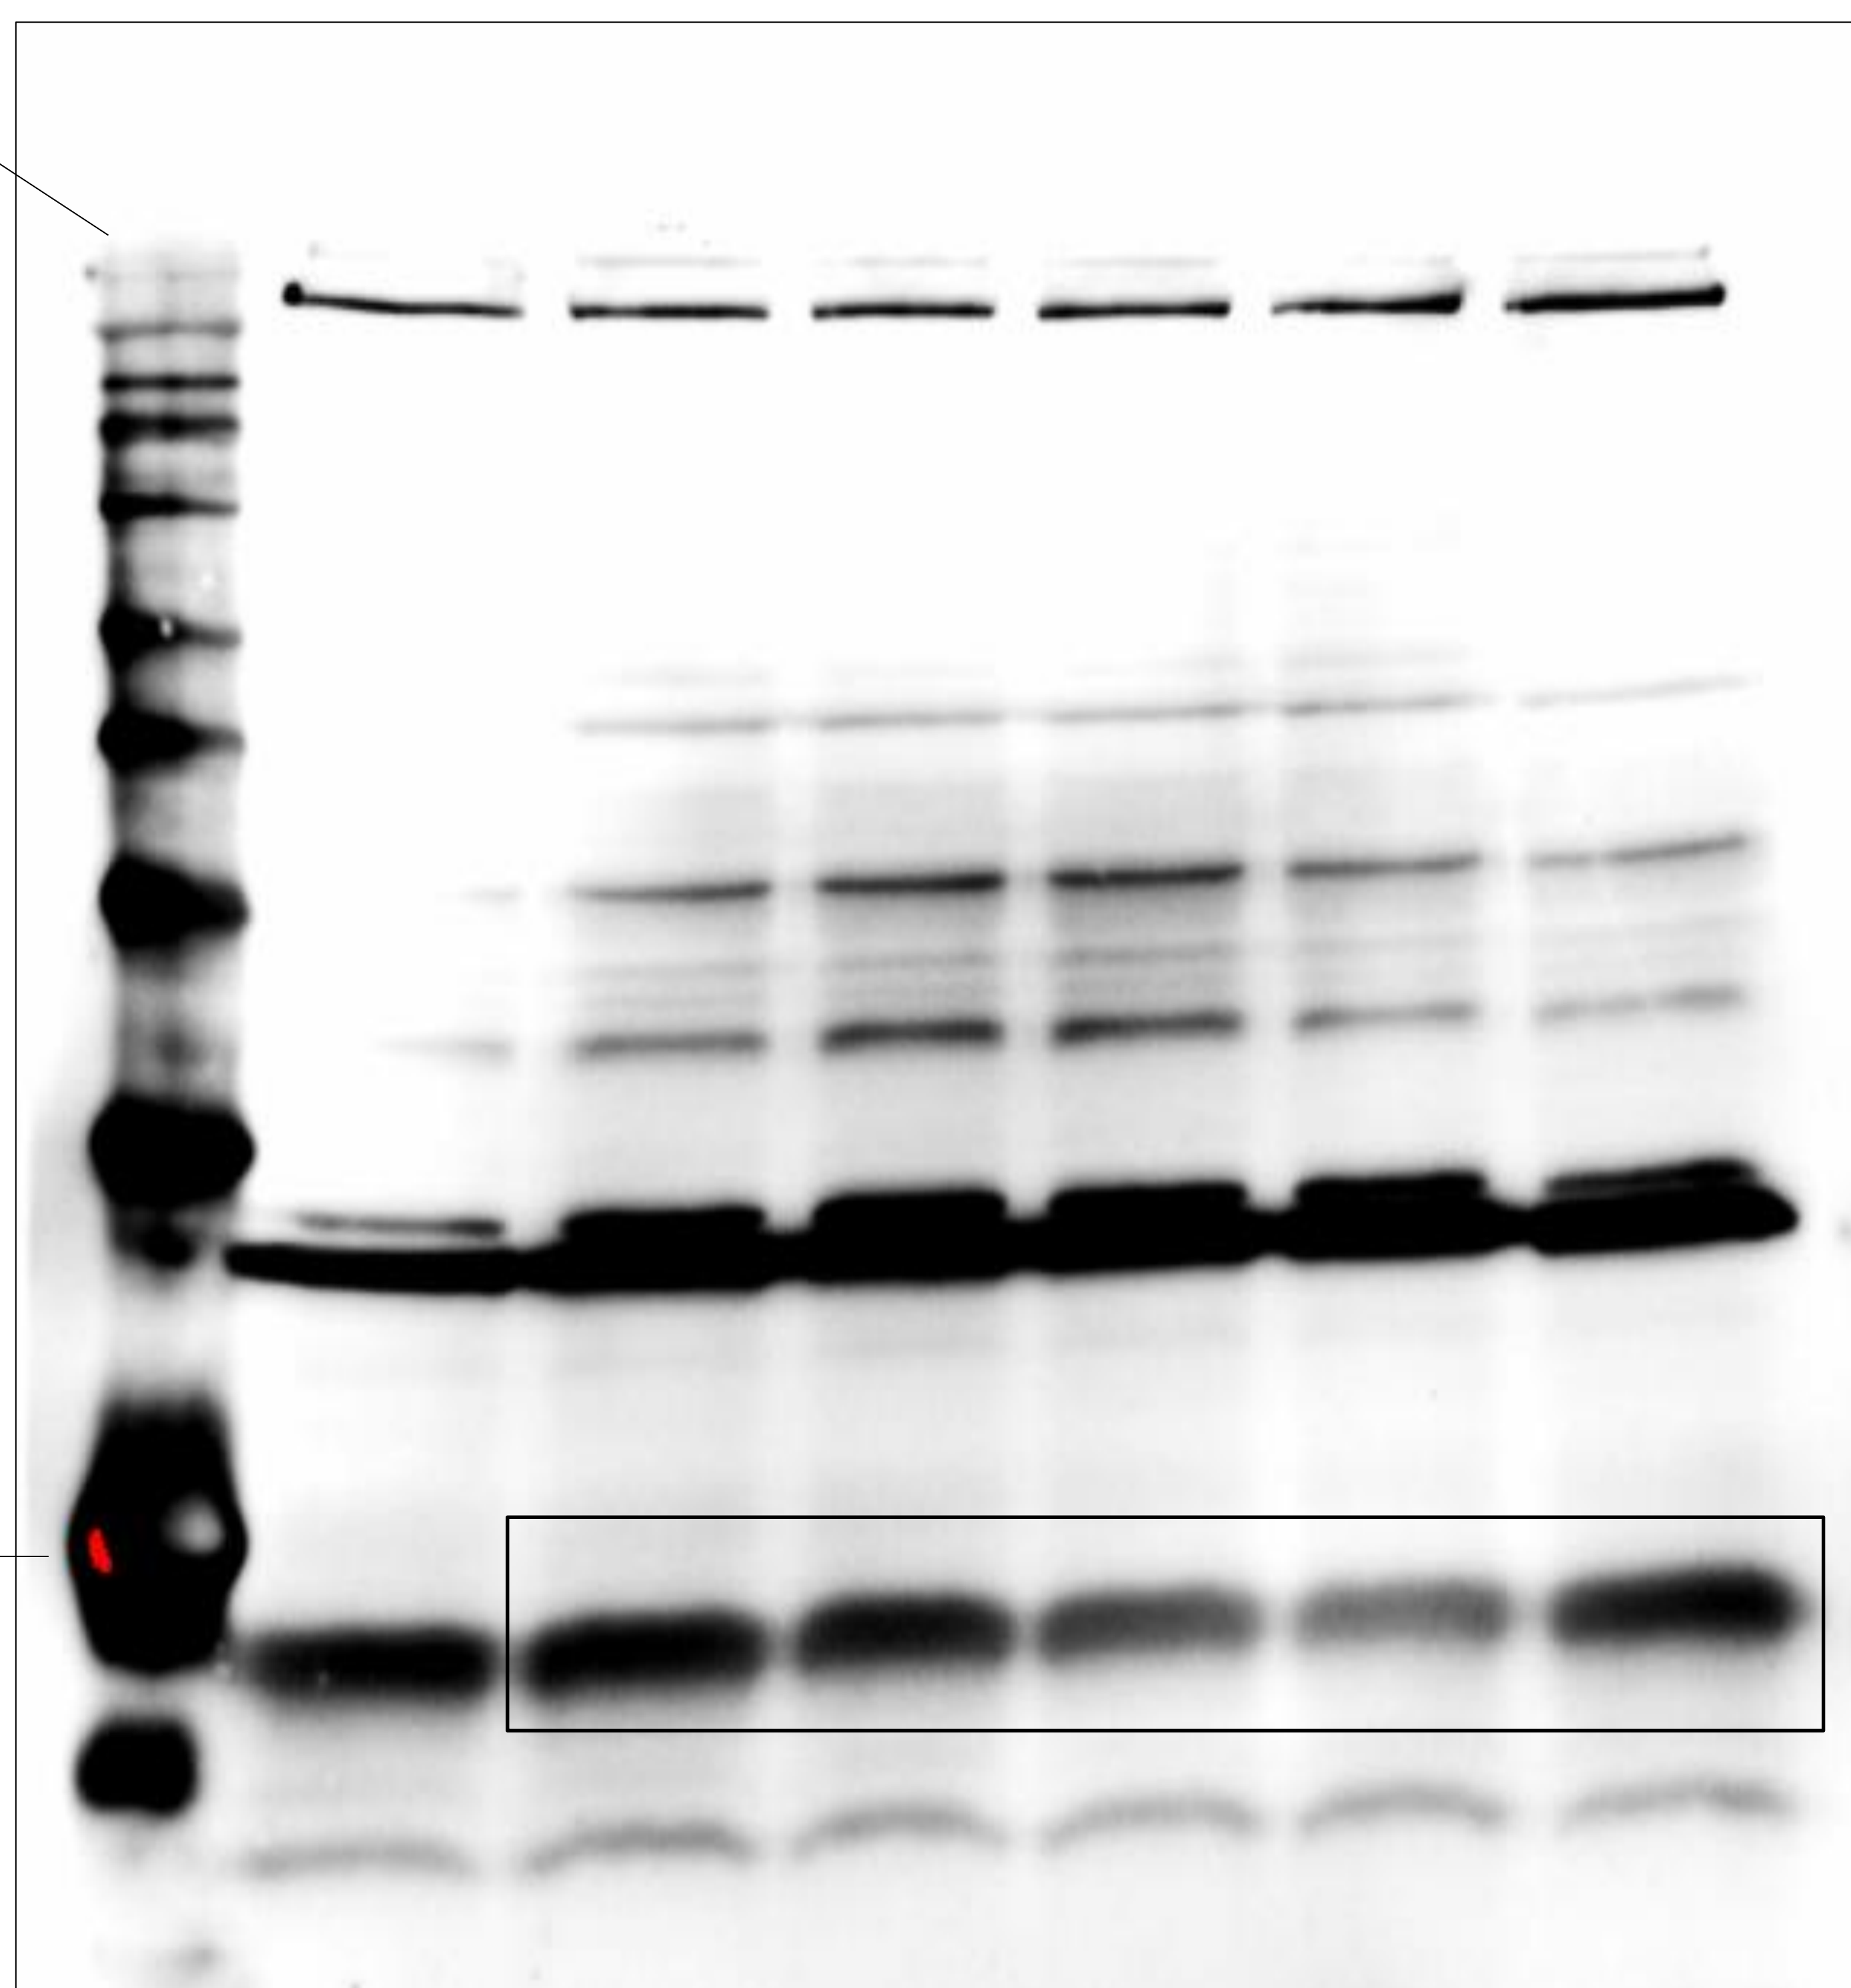

20KD

$\beta$ -actin

40KD

Figure 1C

Hepcidin

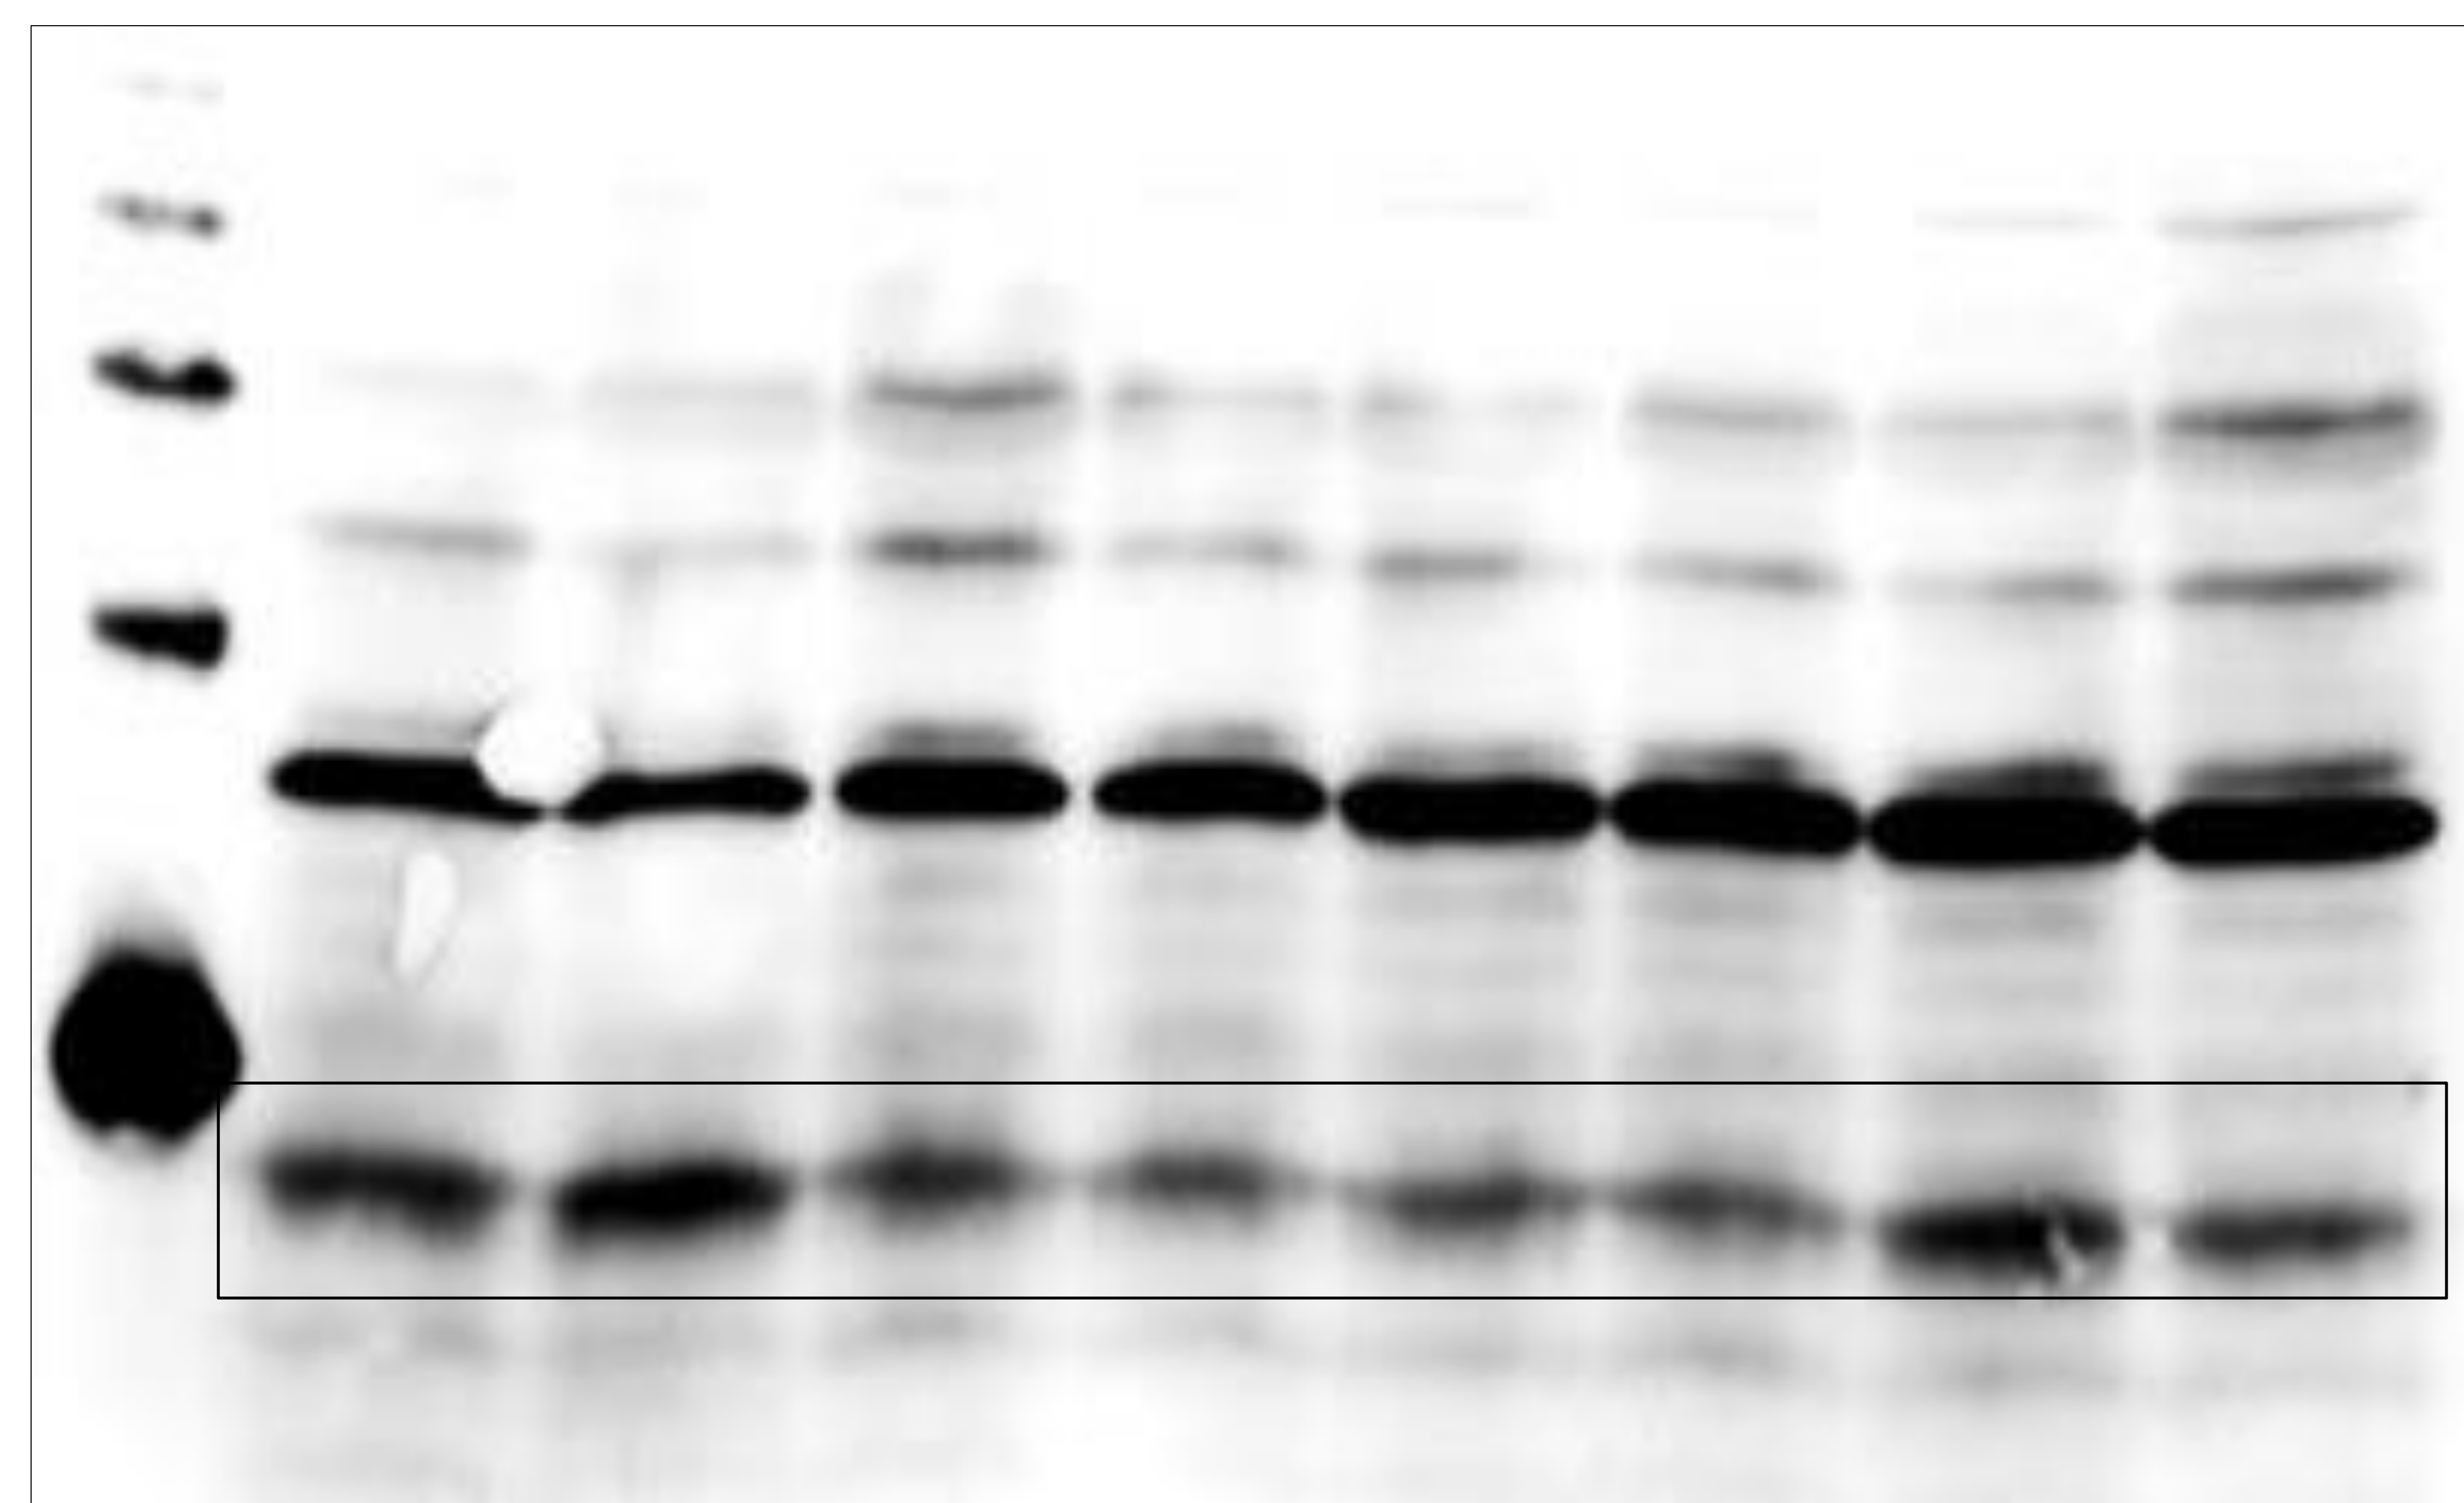

20KD

$\beta$ -actin

40KD

Figure 1D

pSTAT3

80KD

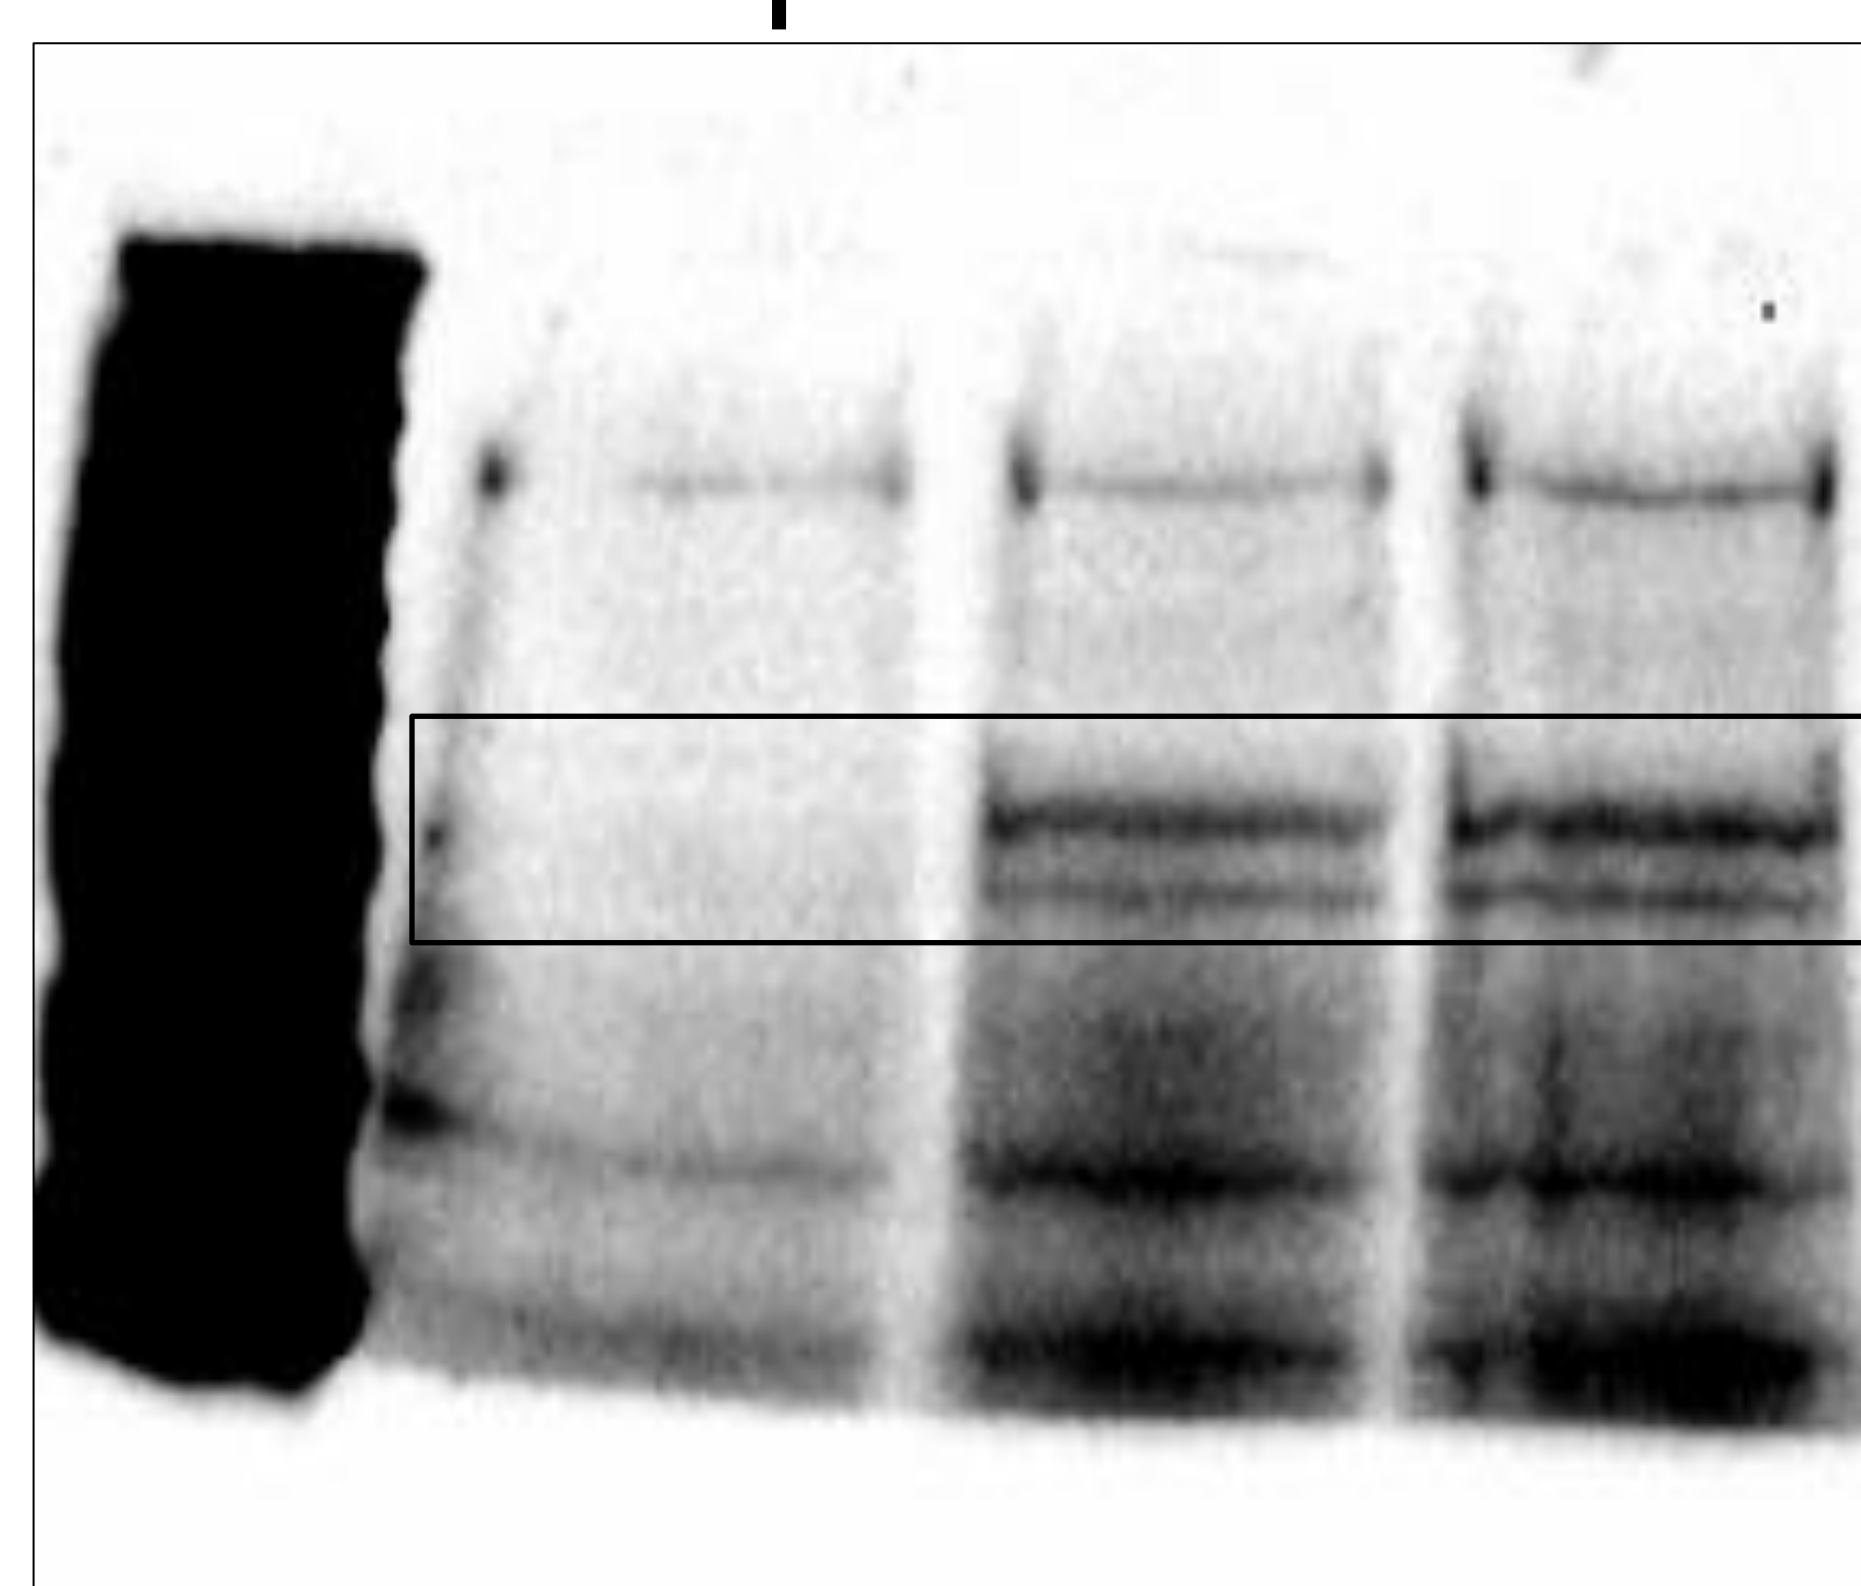

tSTAT3

80KD

Hepcidin

20KD

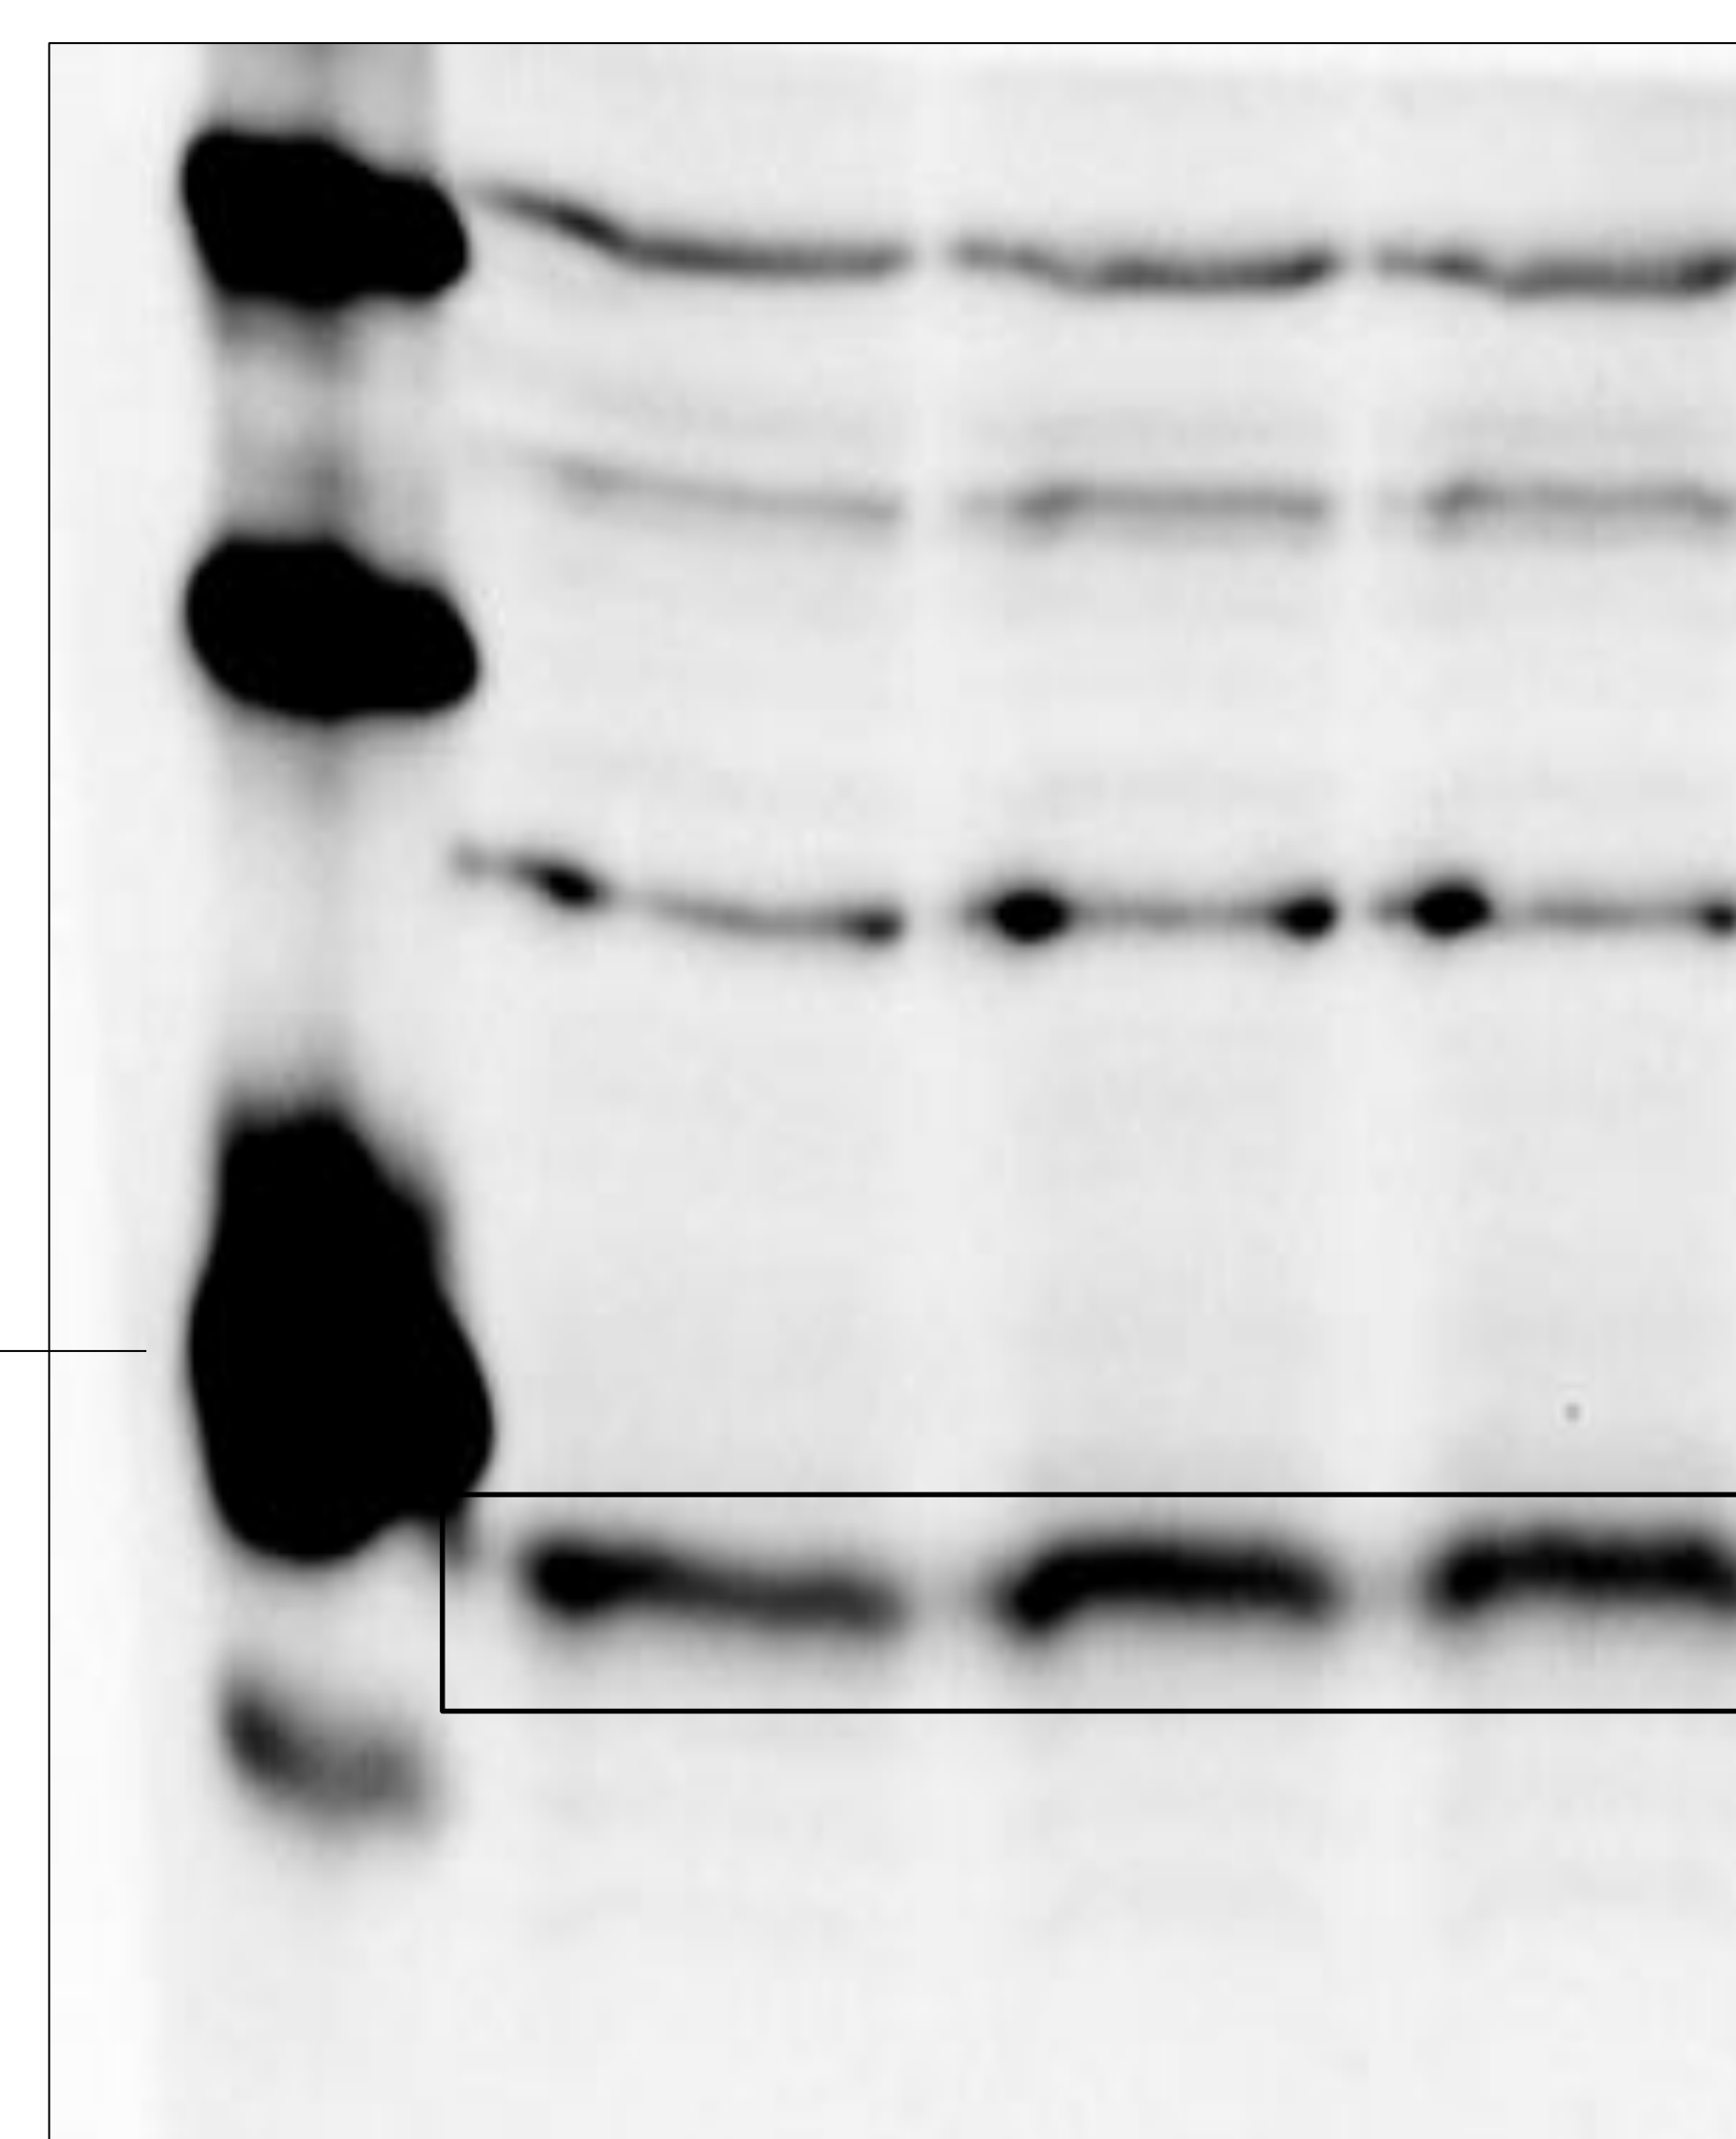

$\beta$ -actin

40KD

Figure 2E

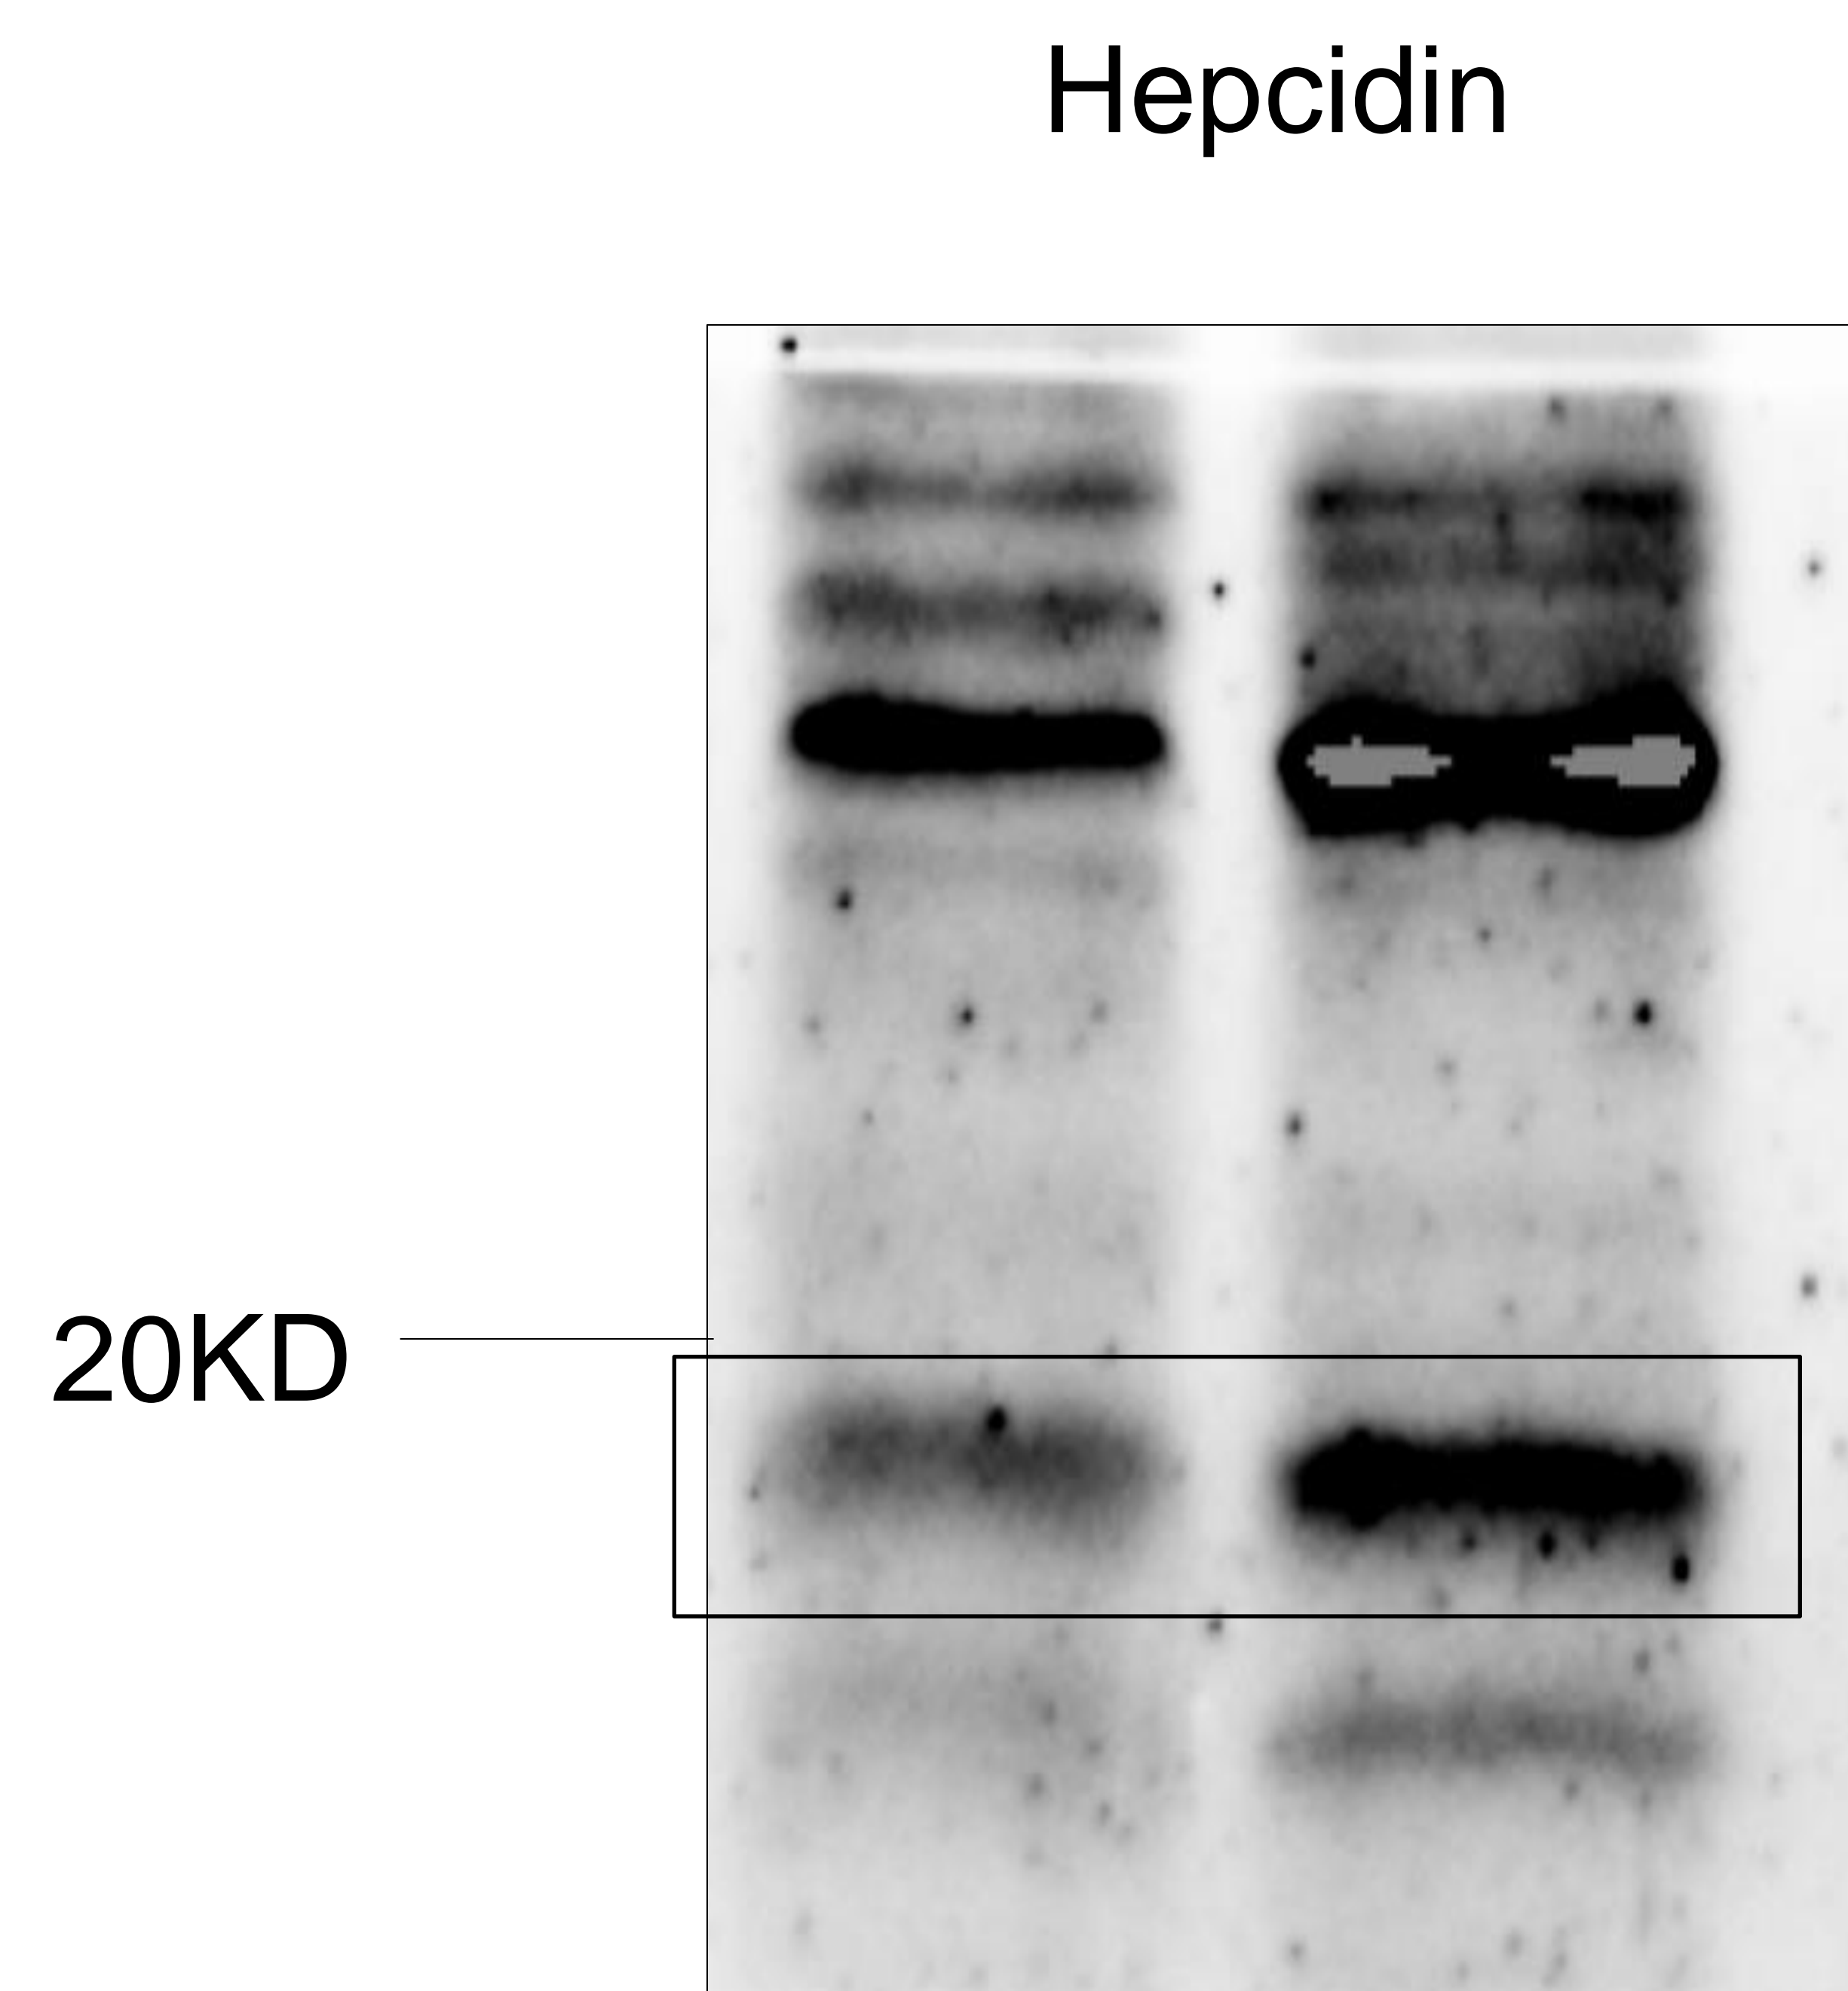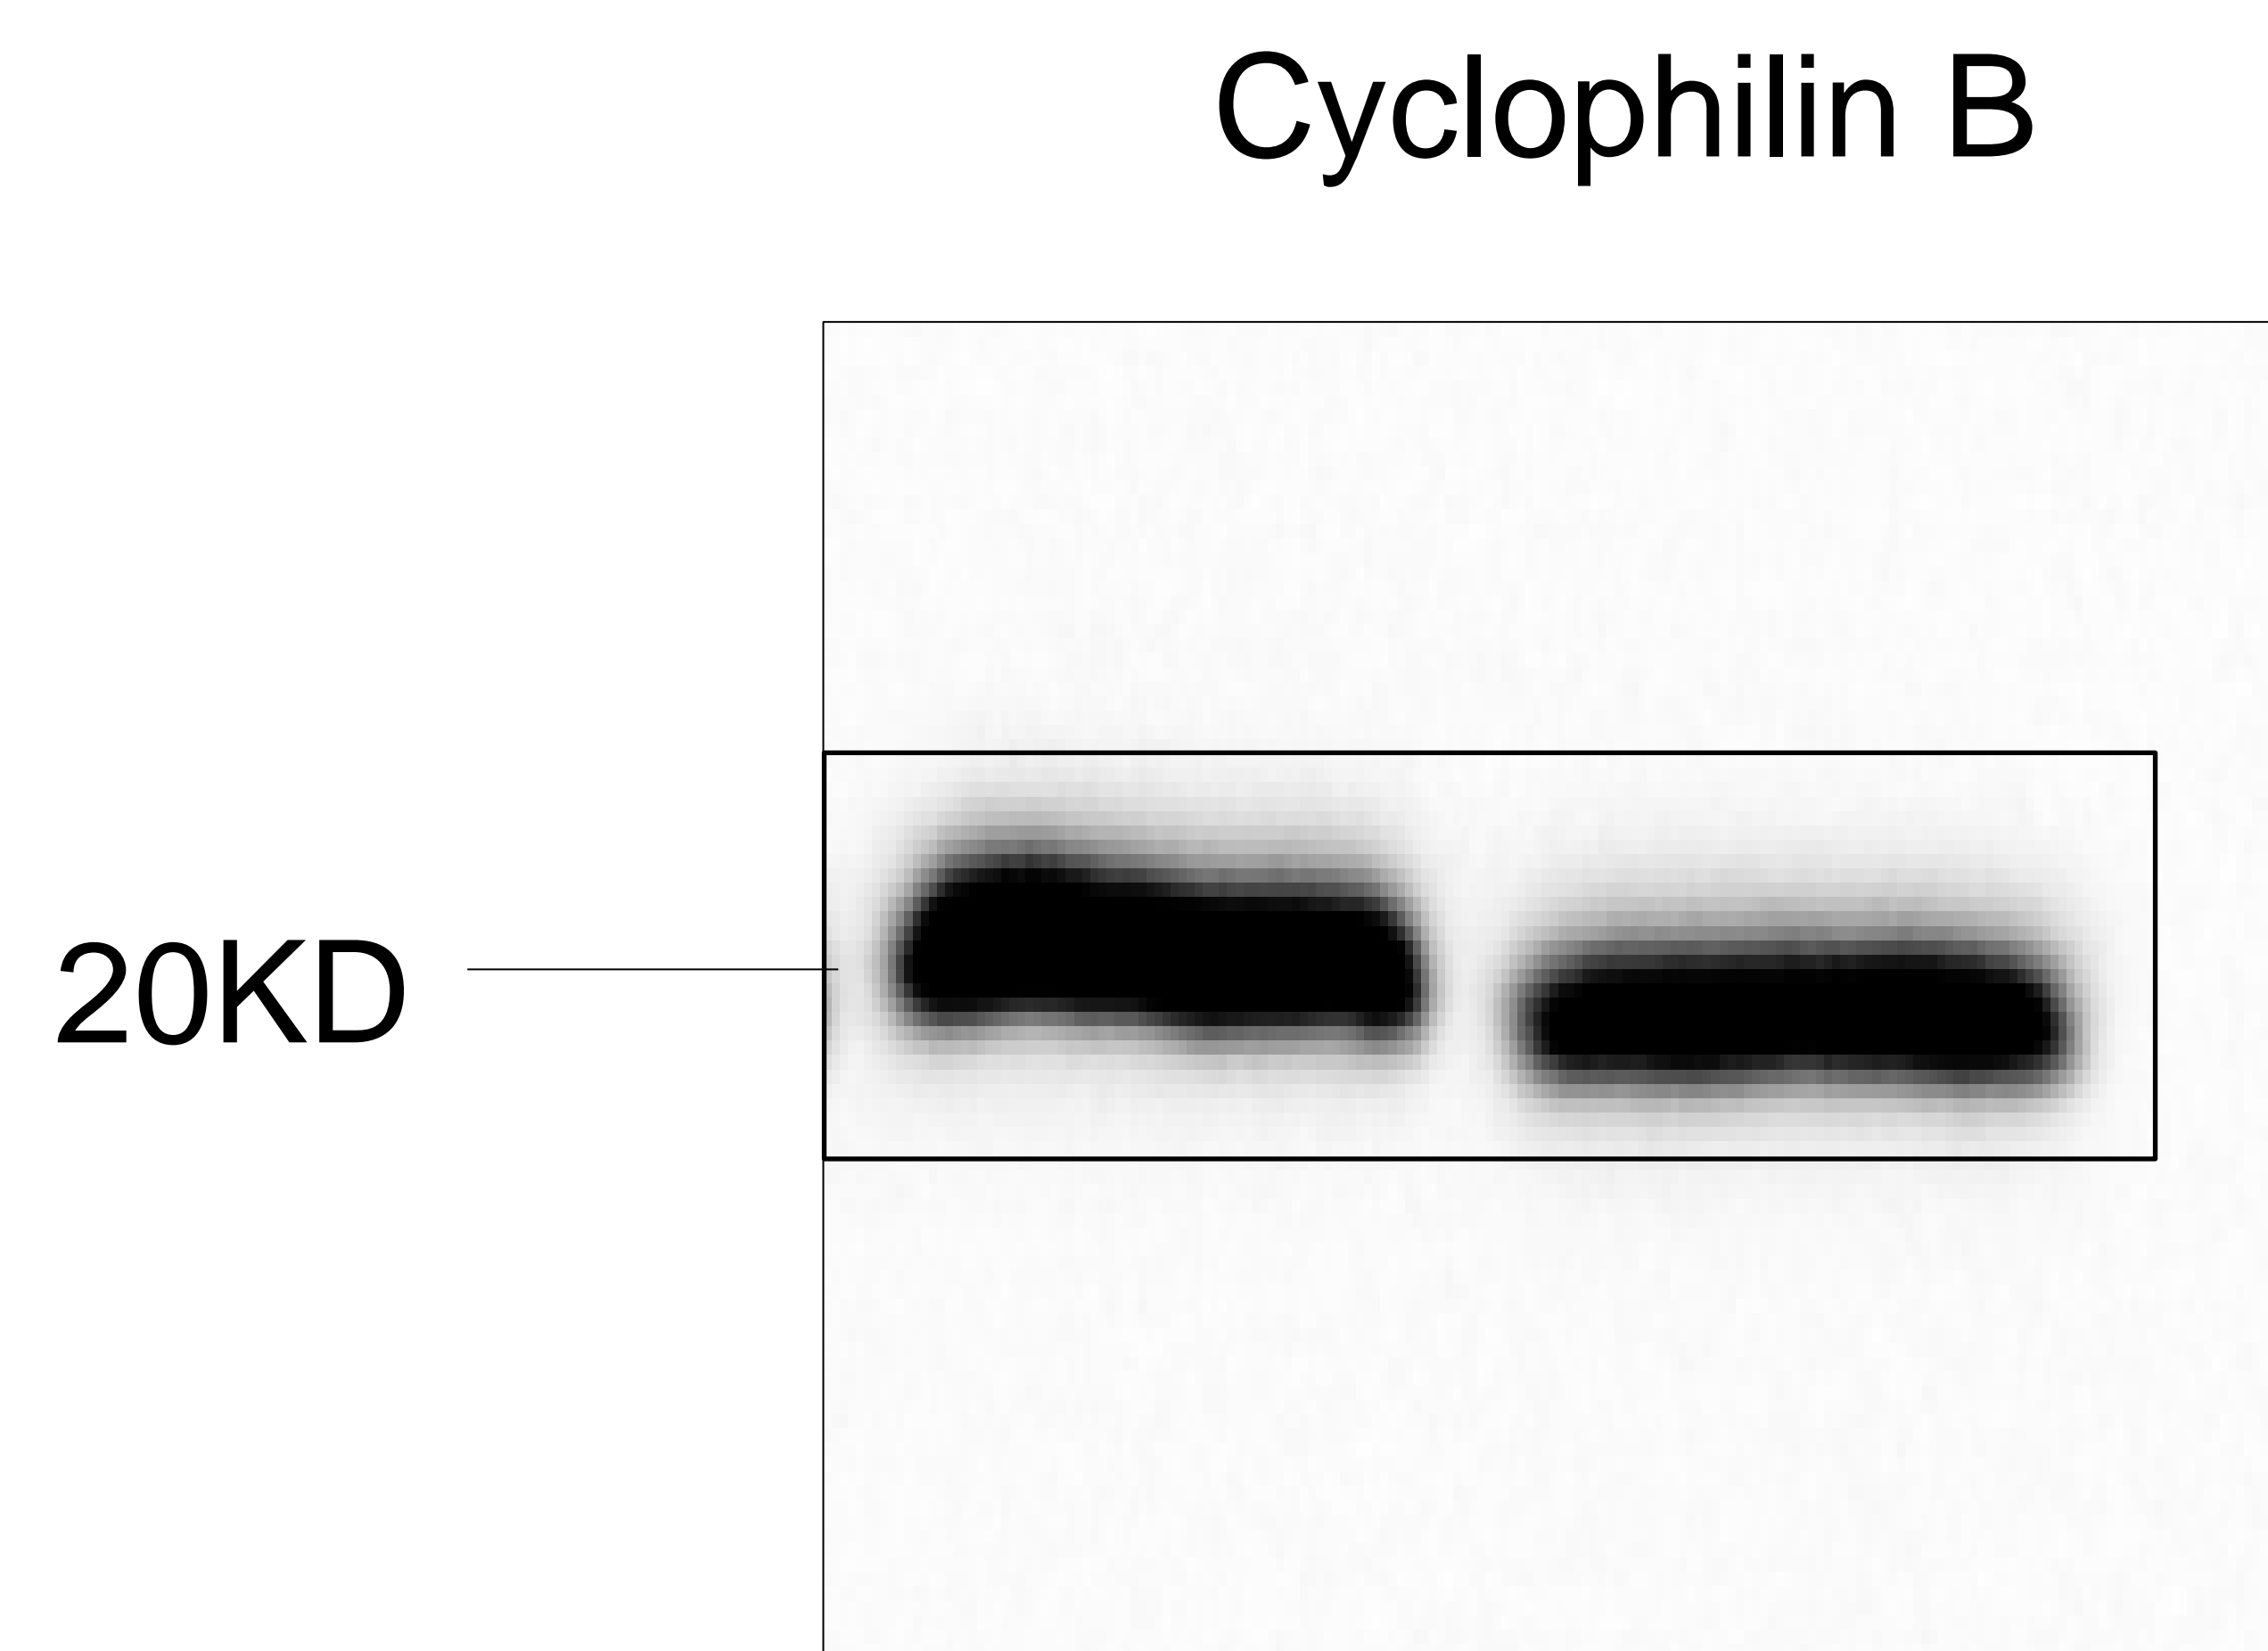

Figure 2F

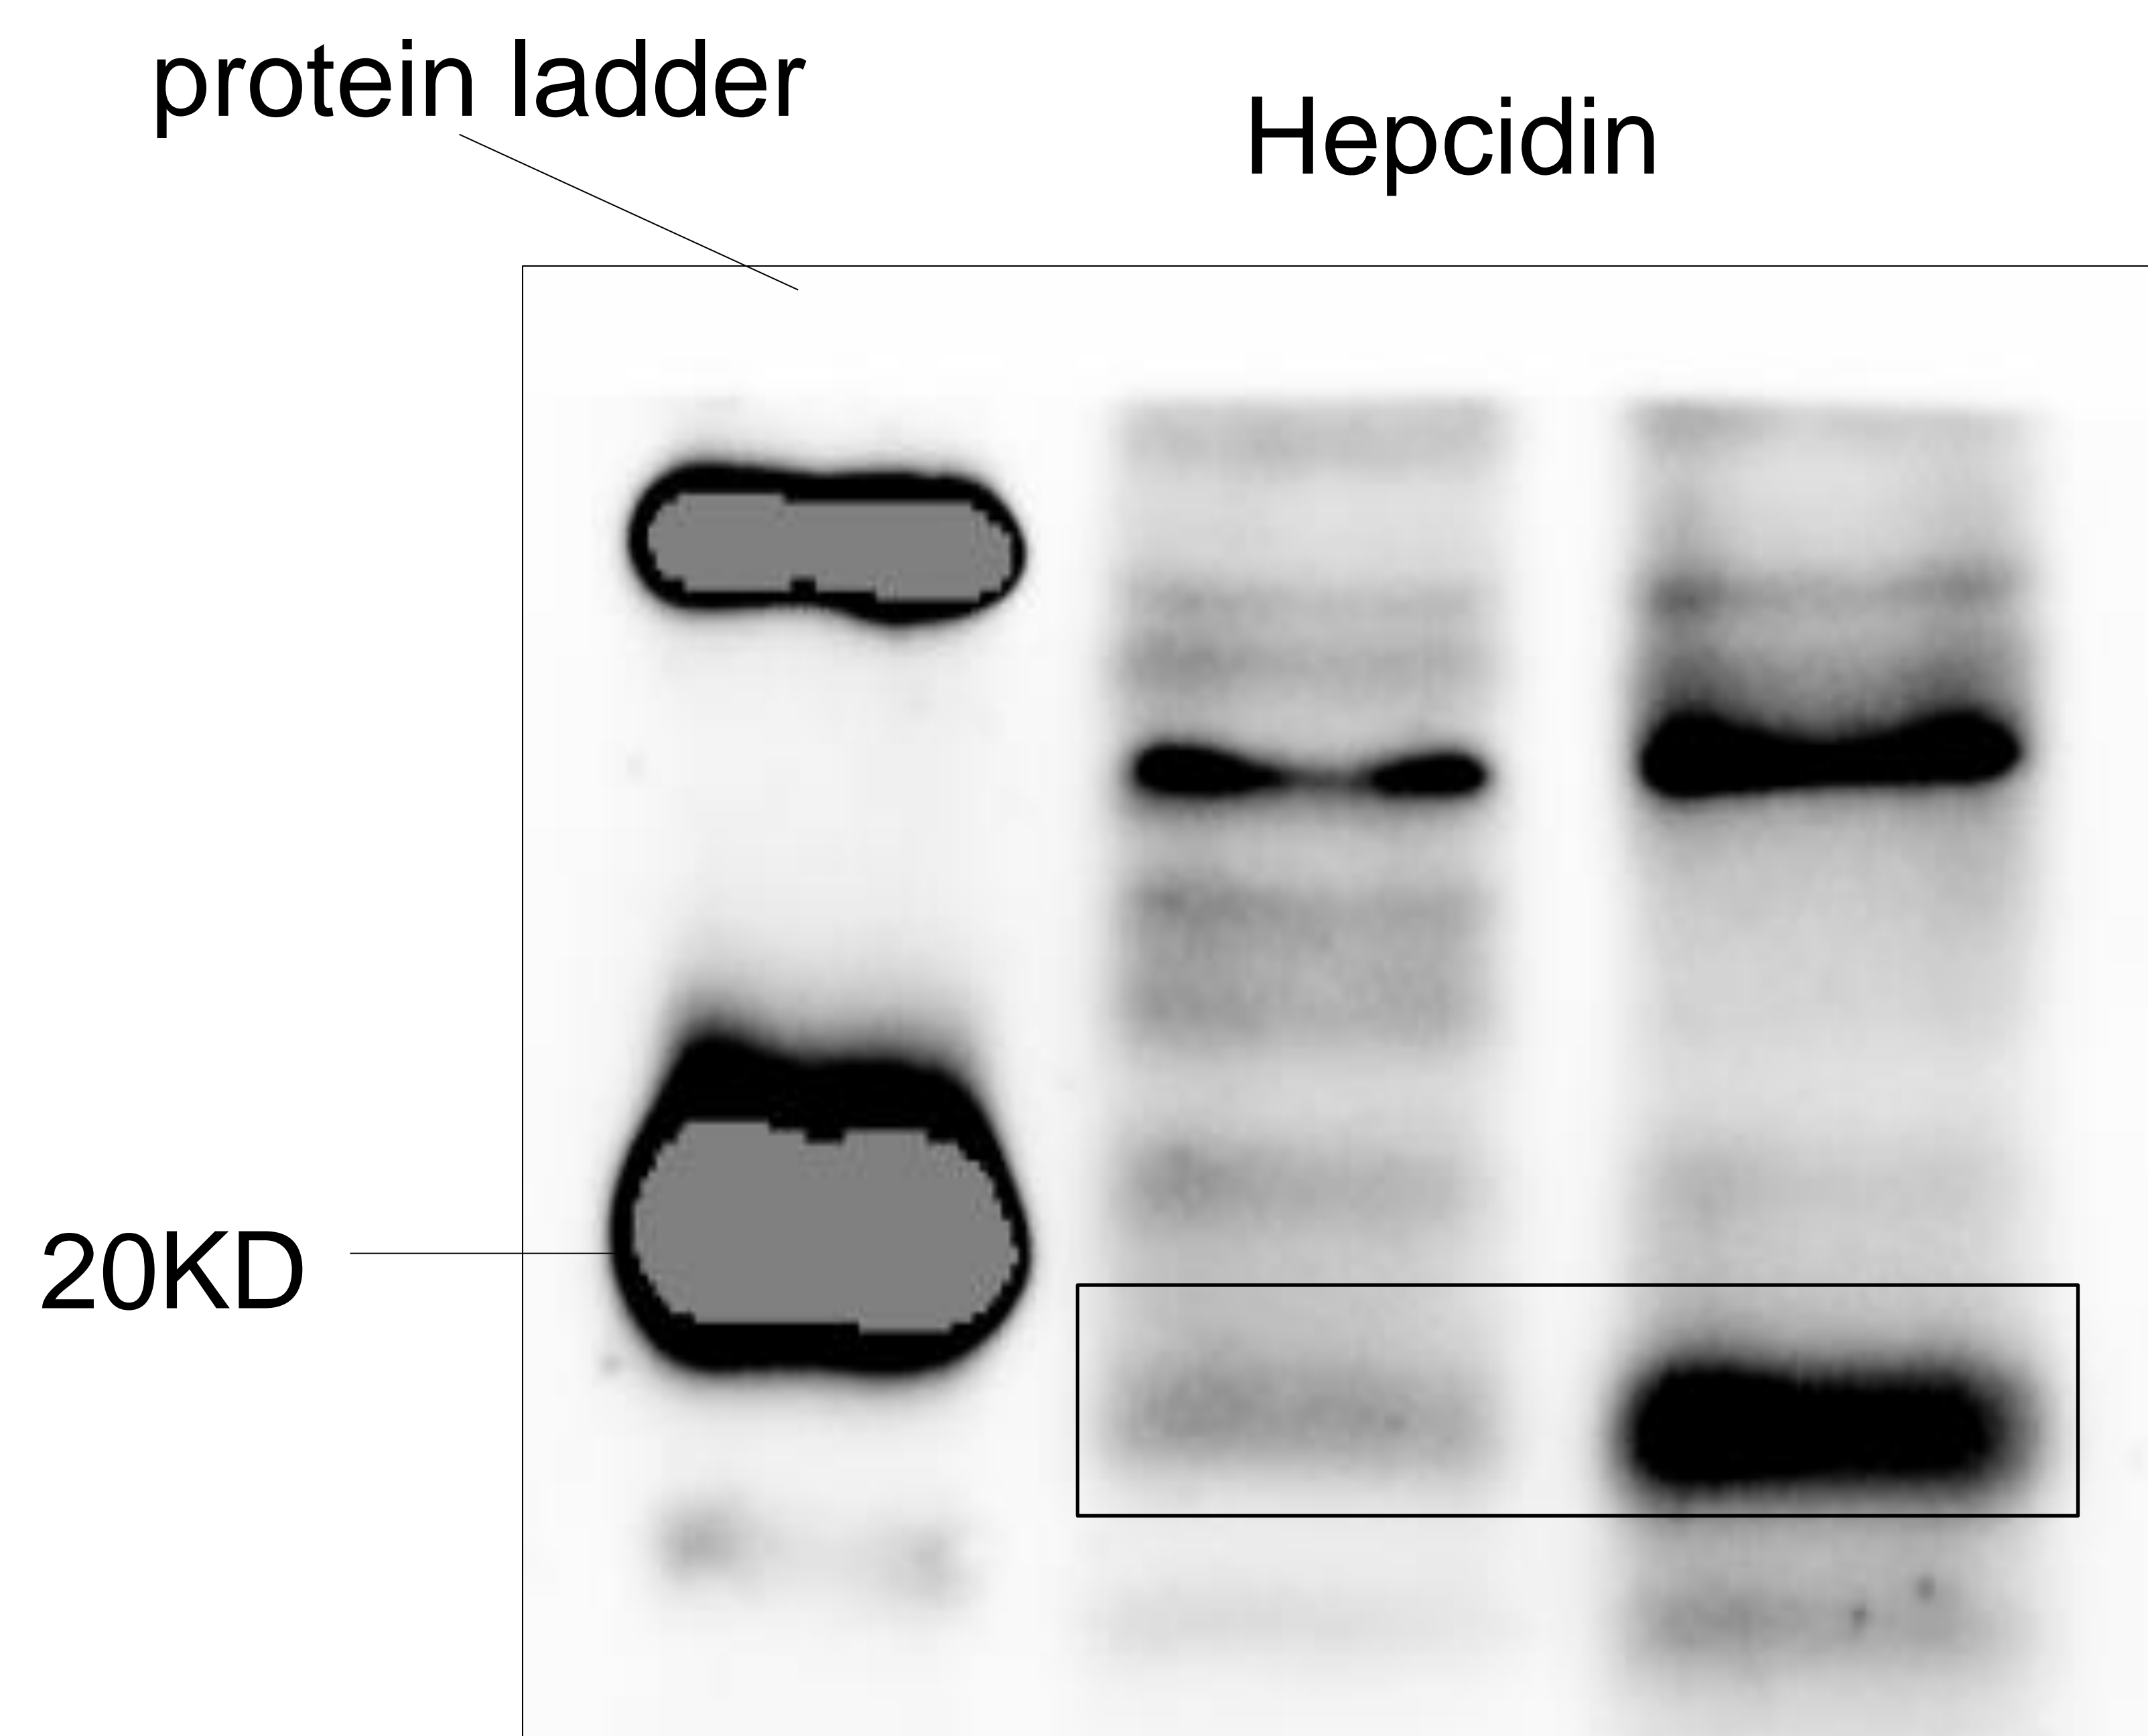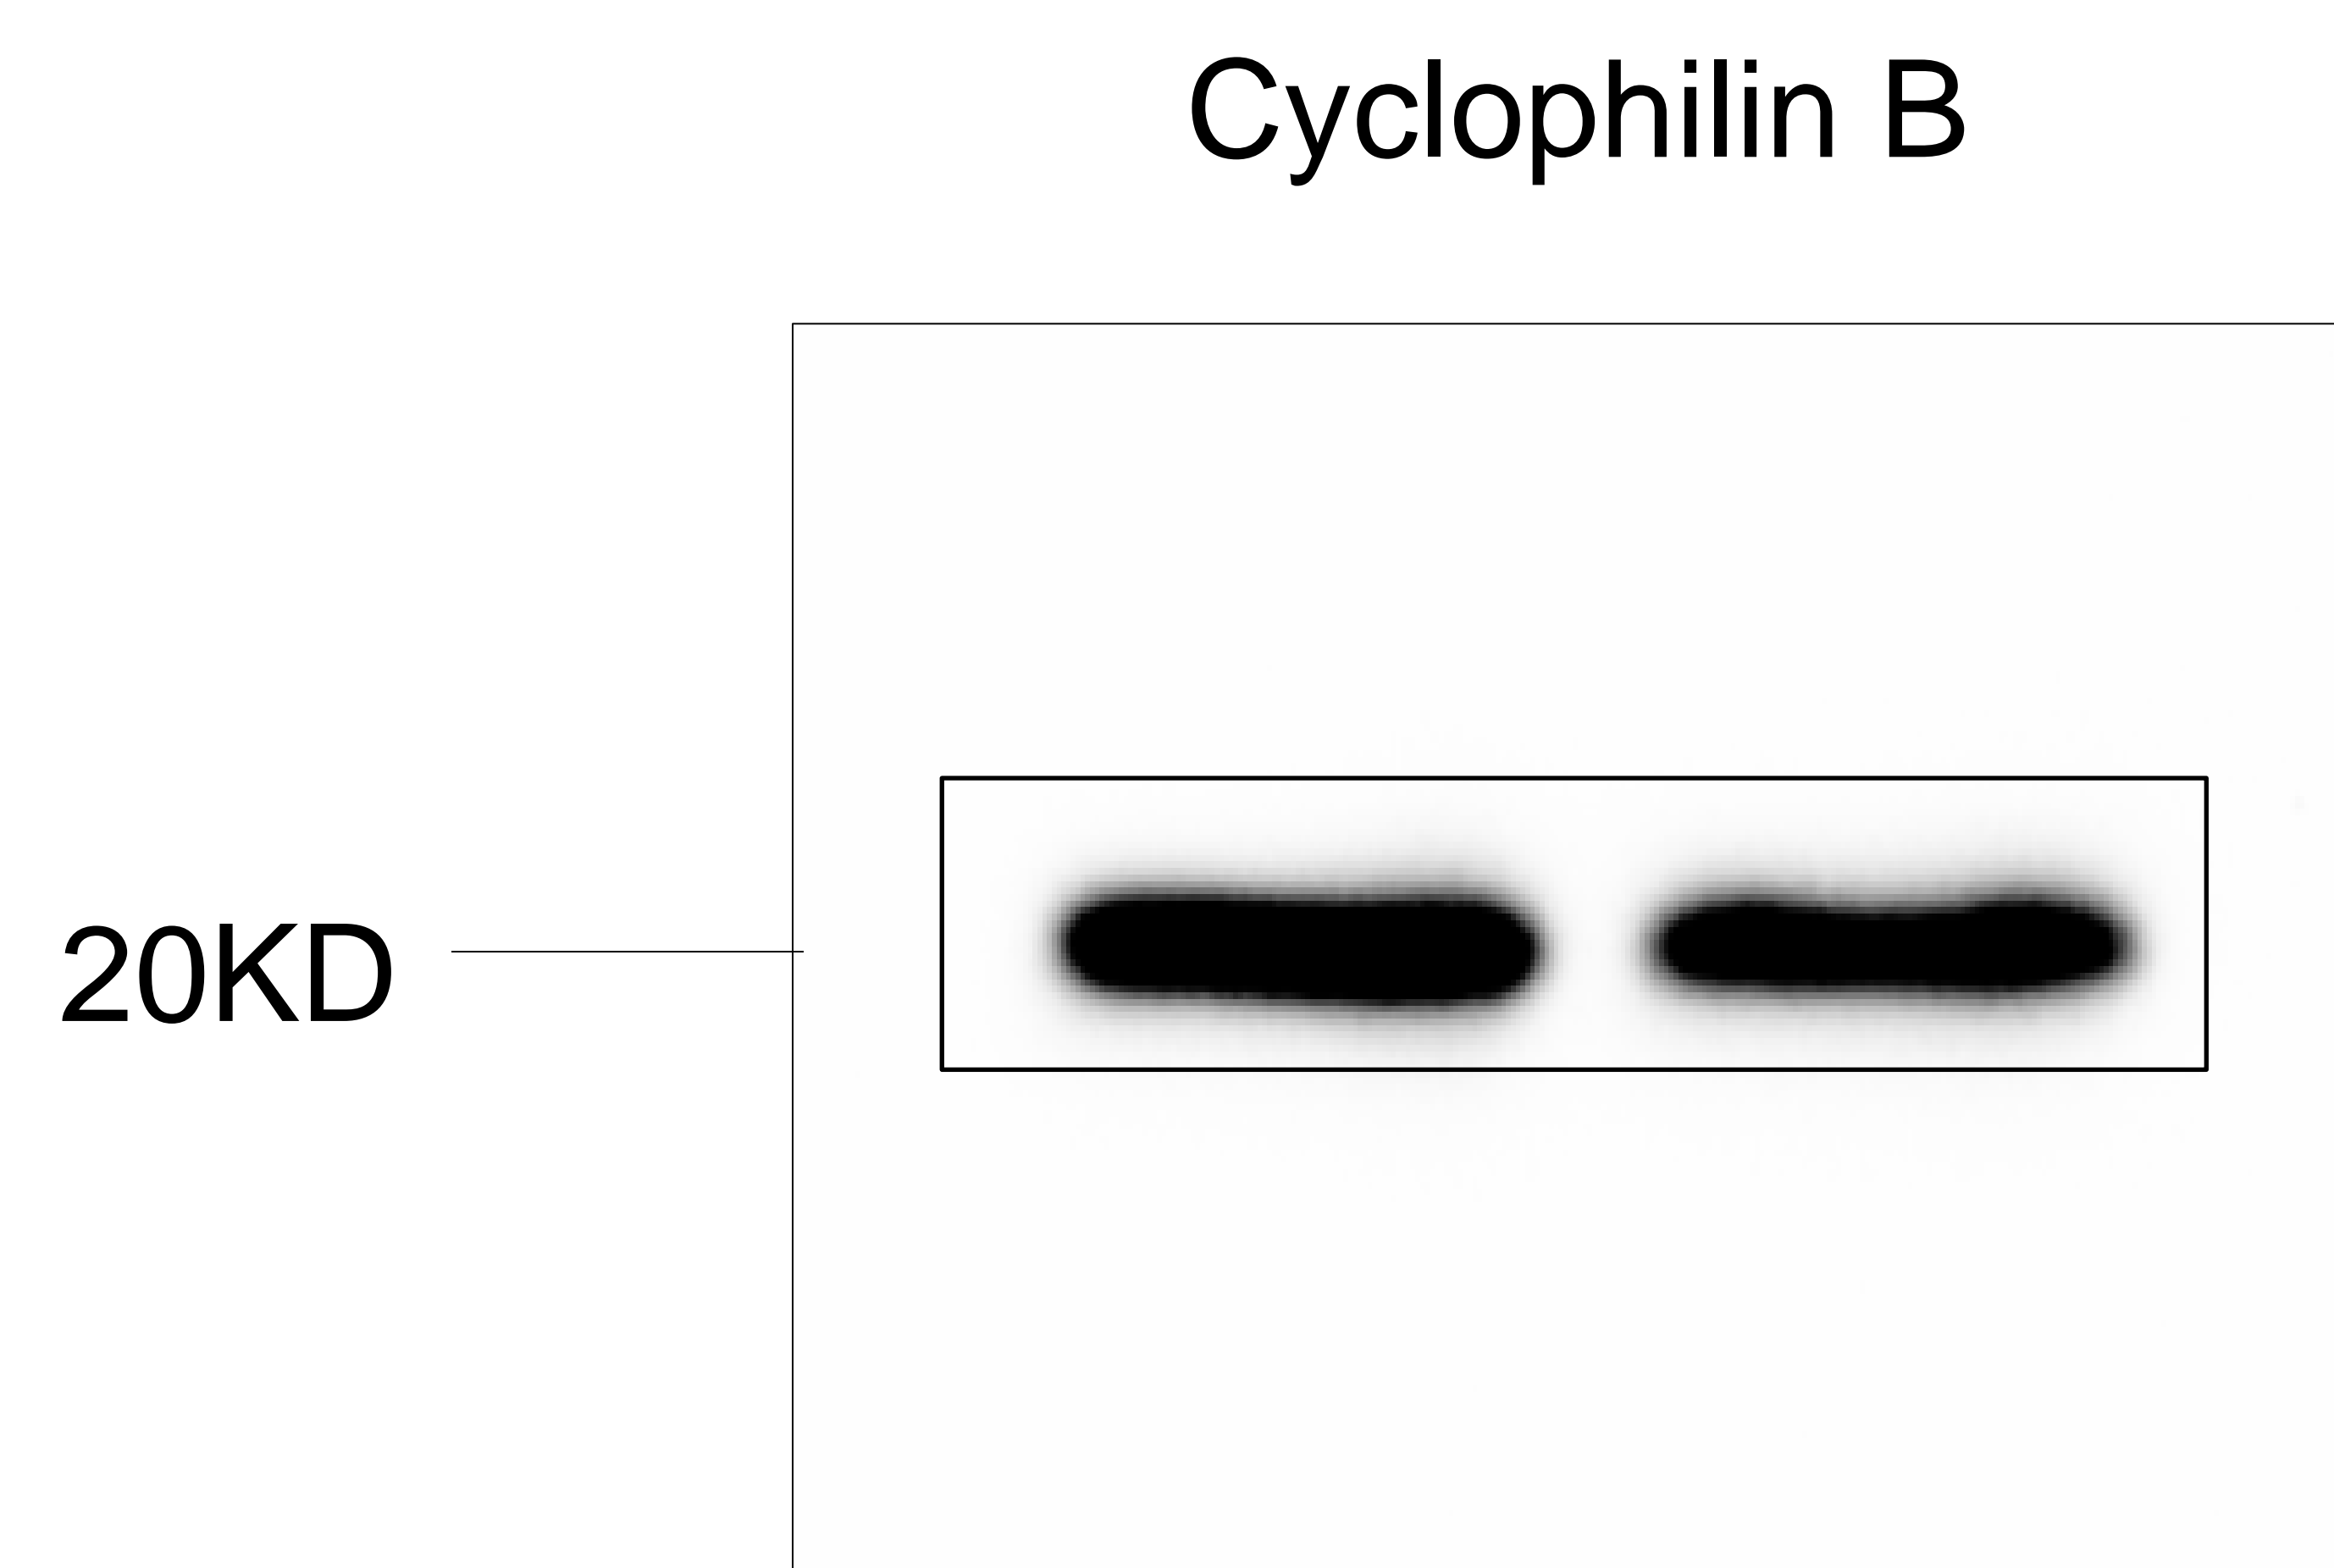

Figure 2G

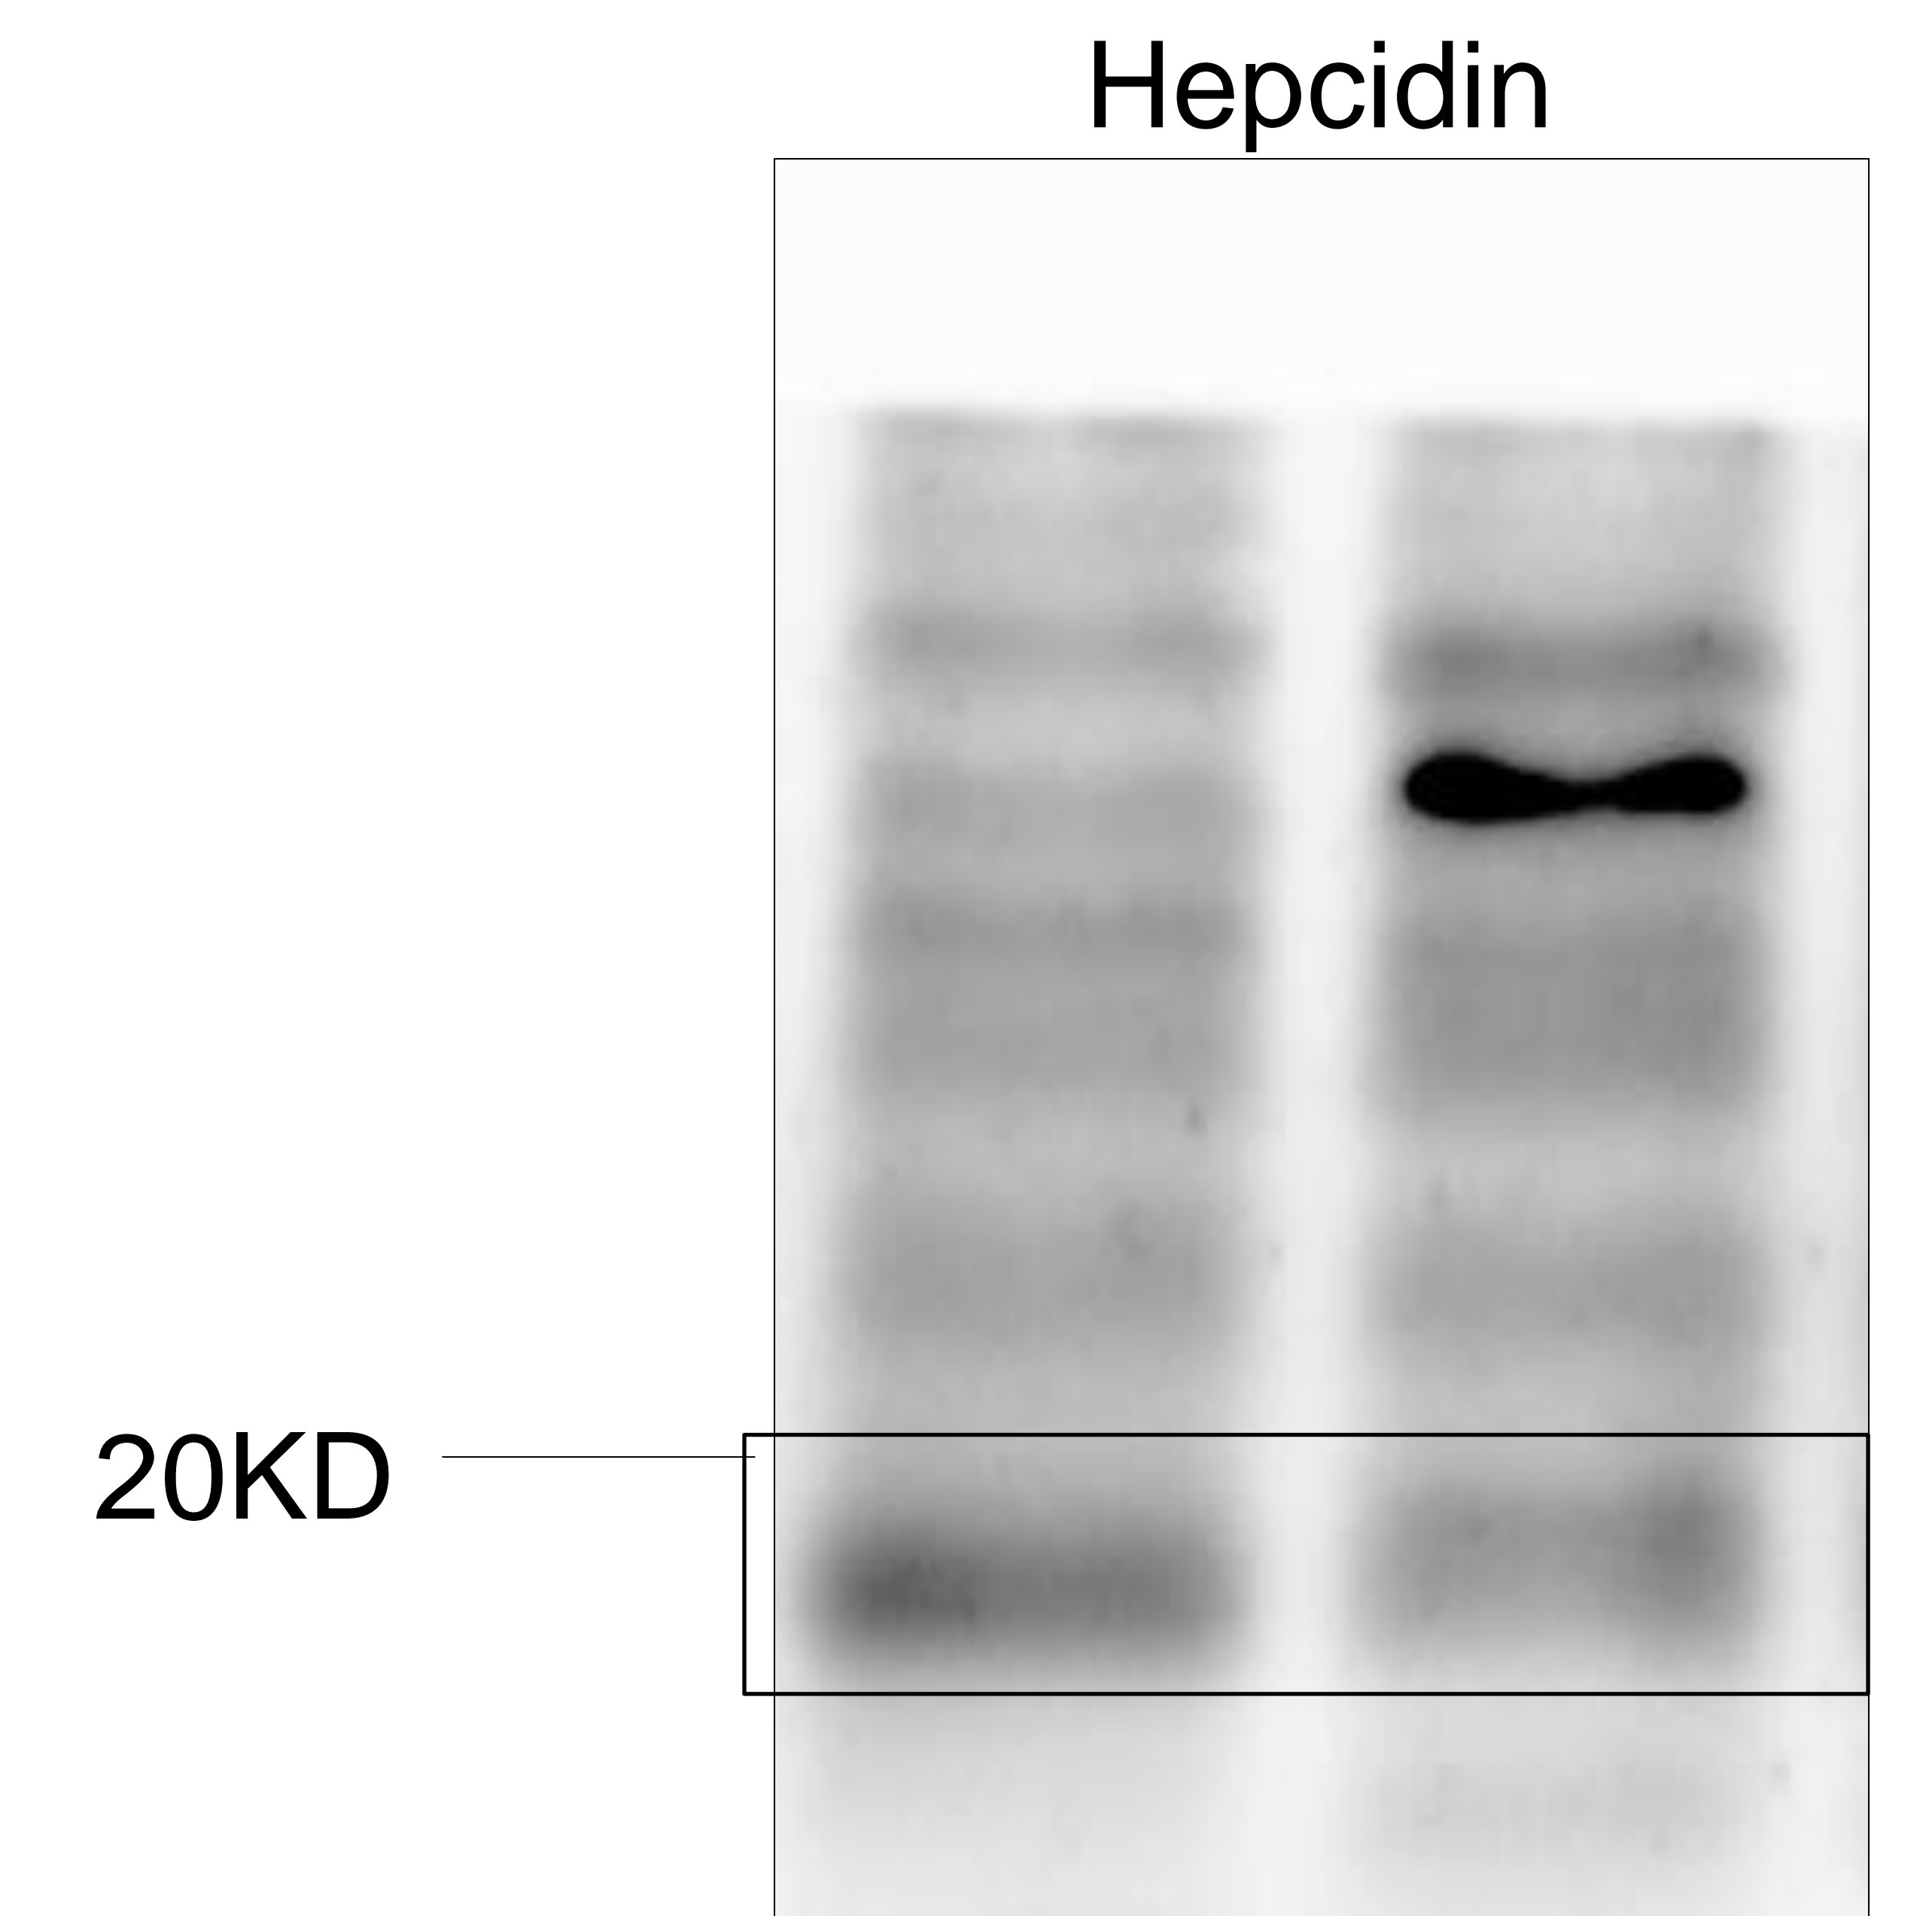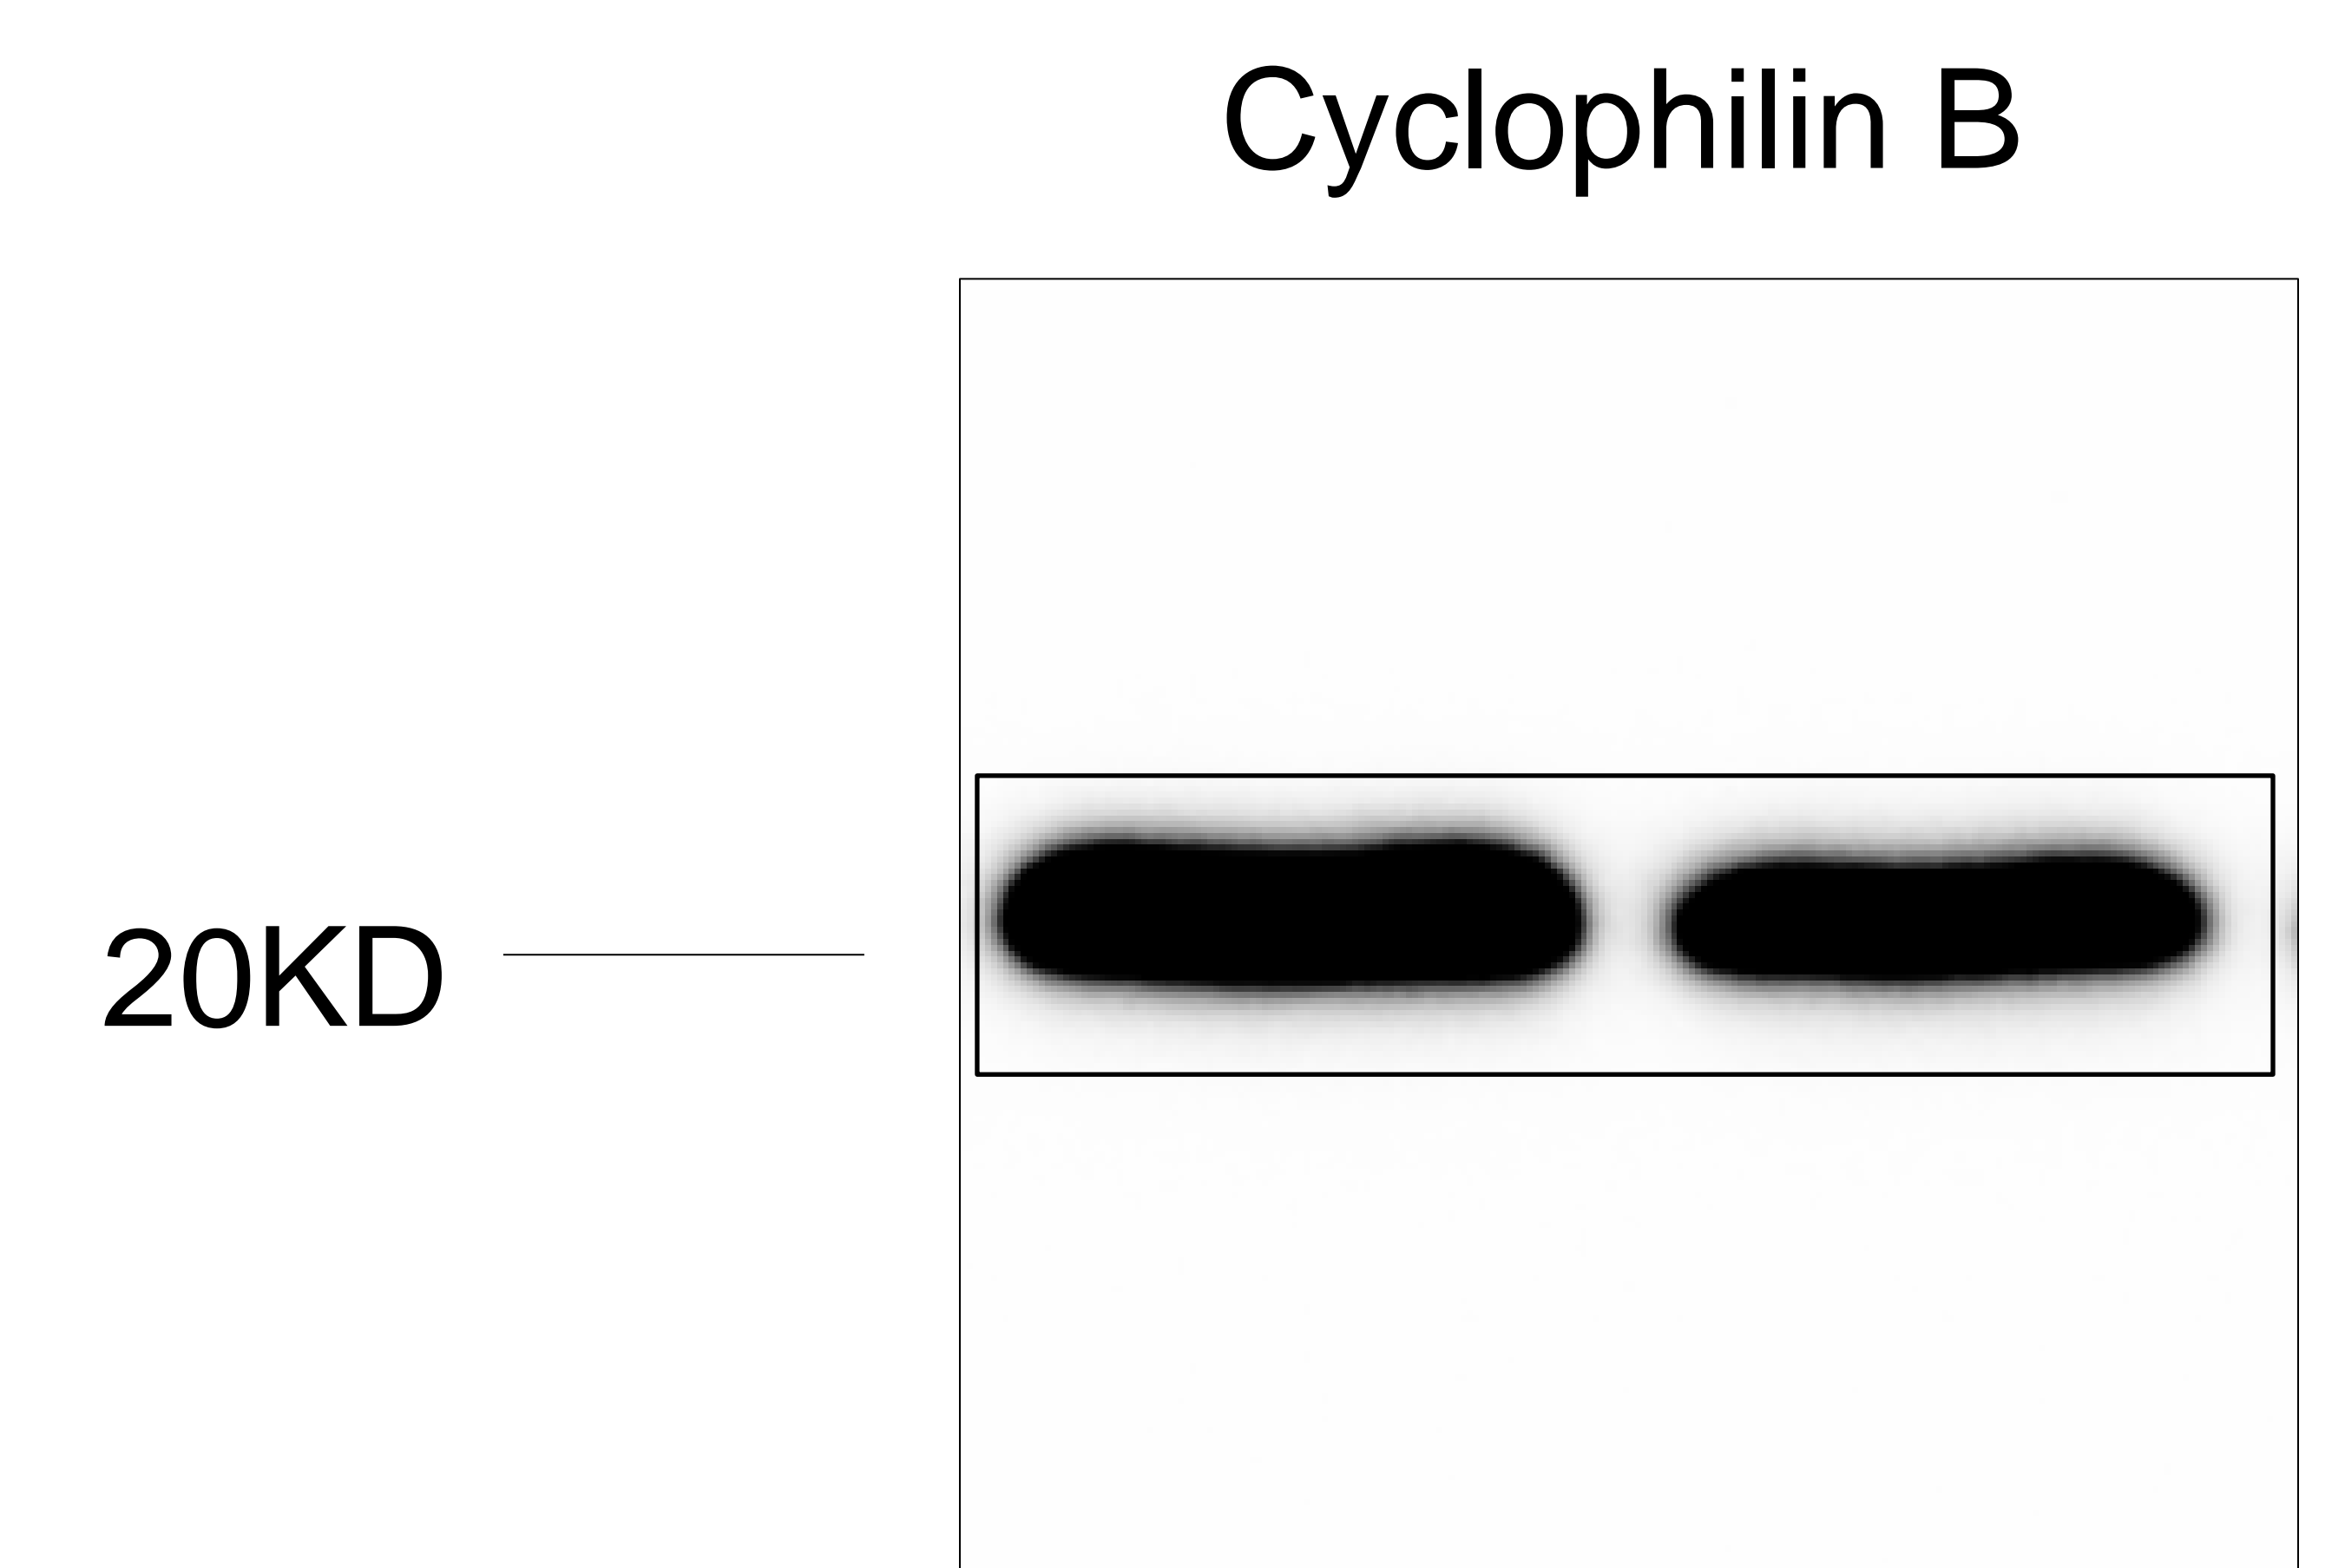

# Figure 3B

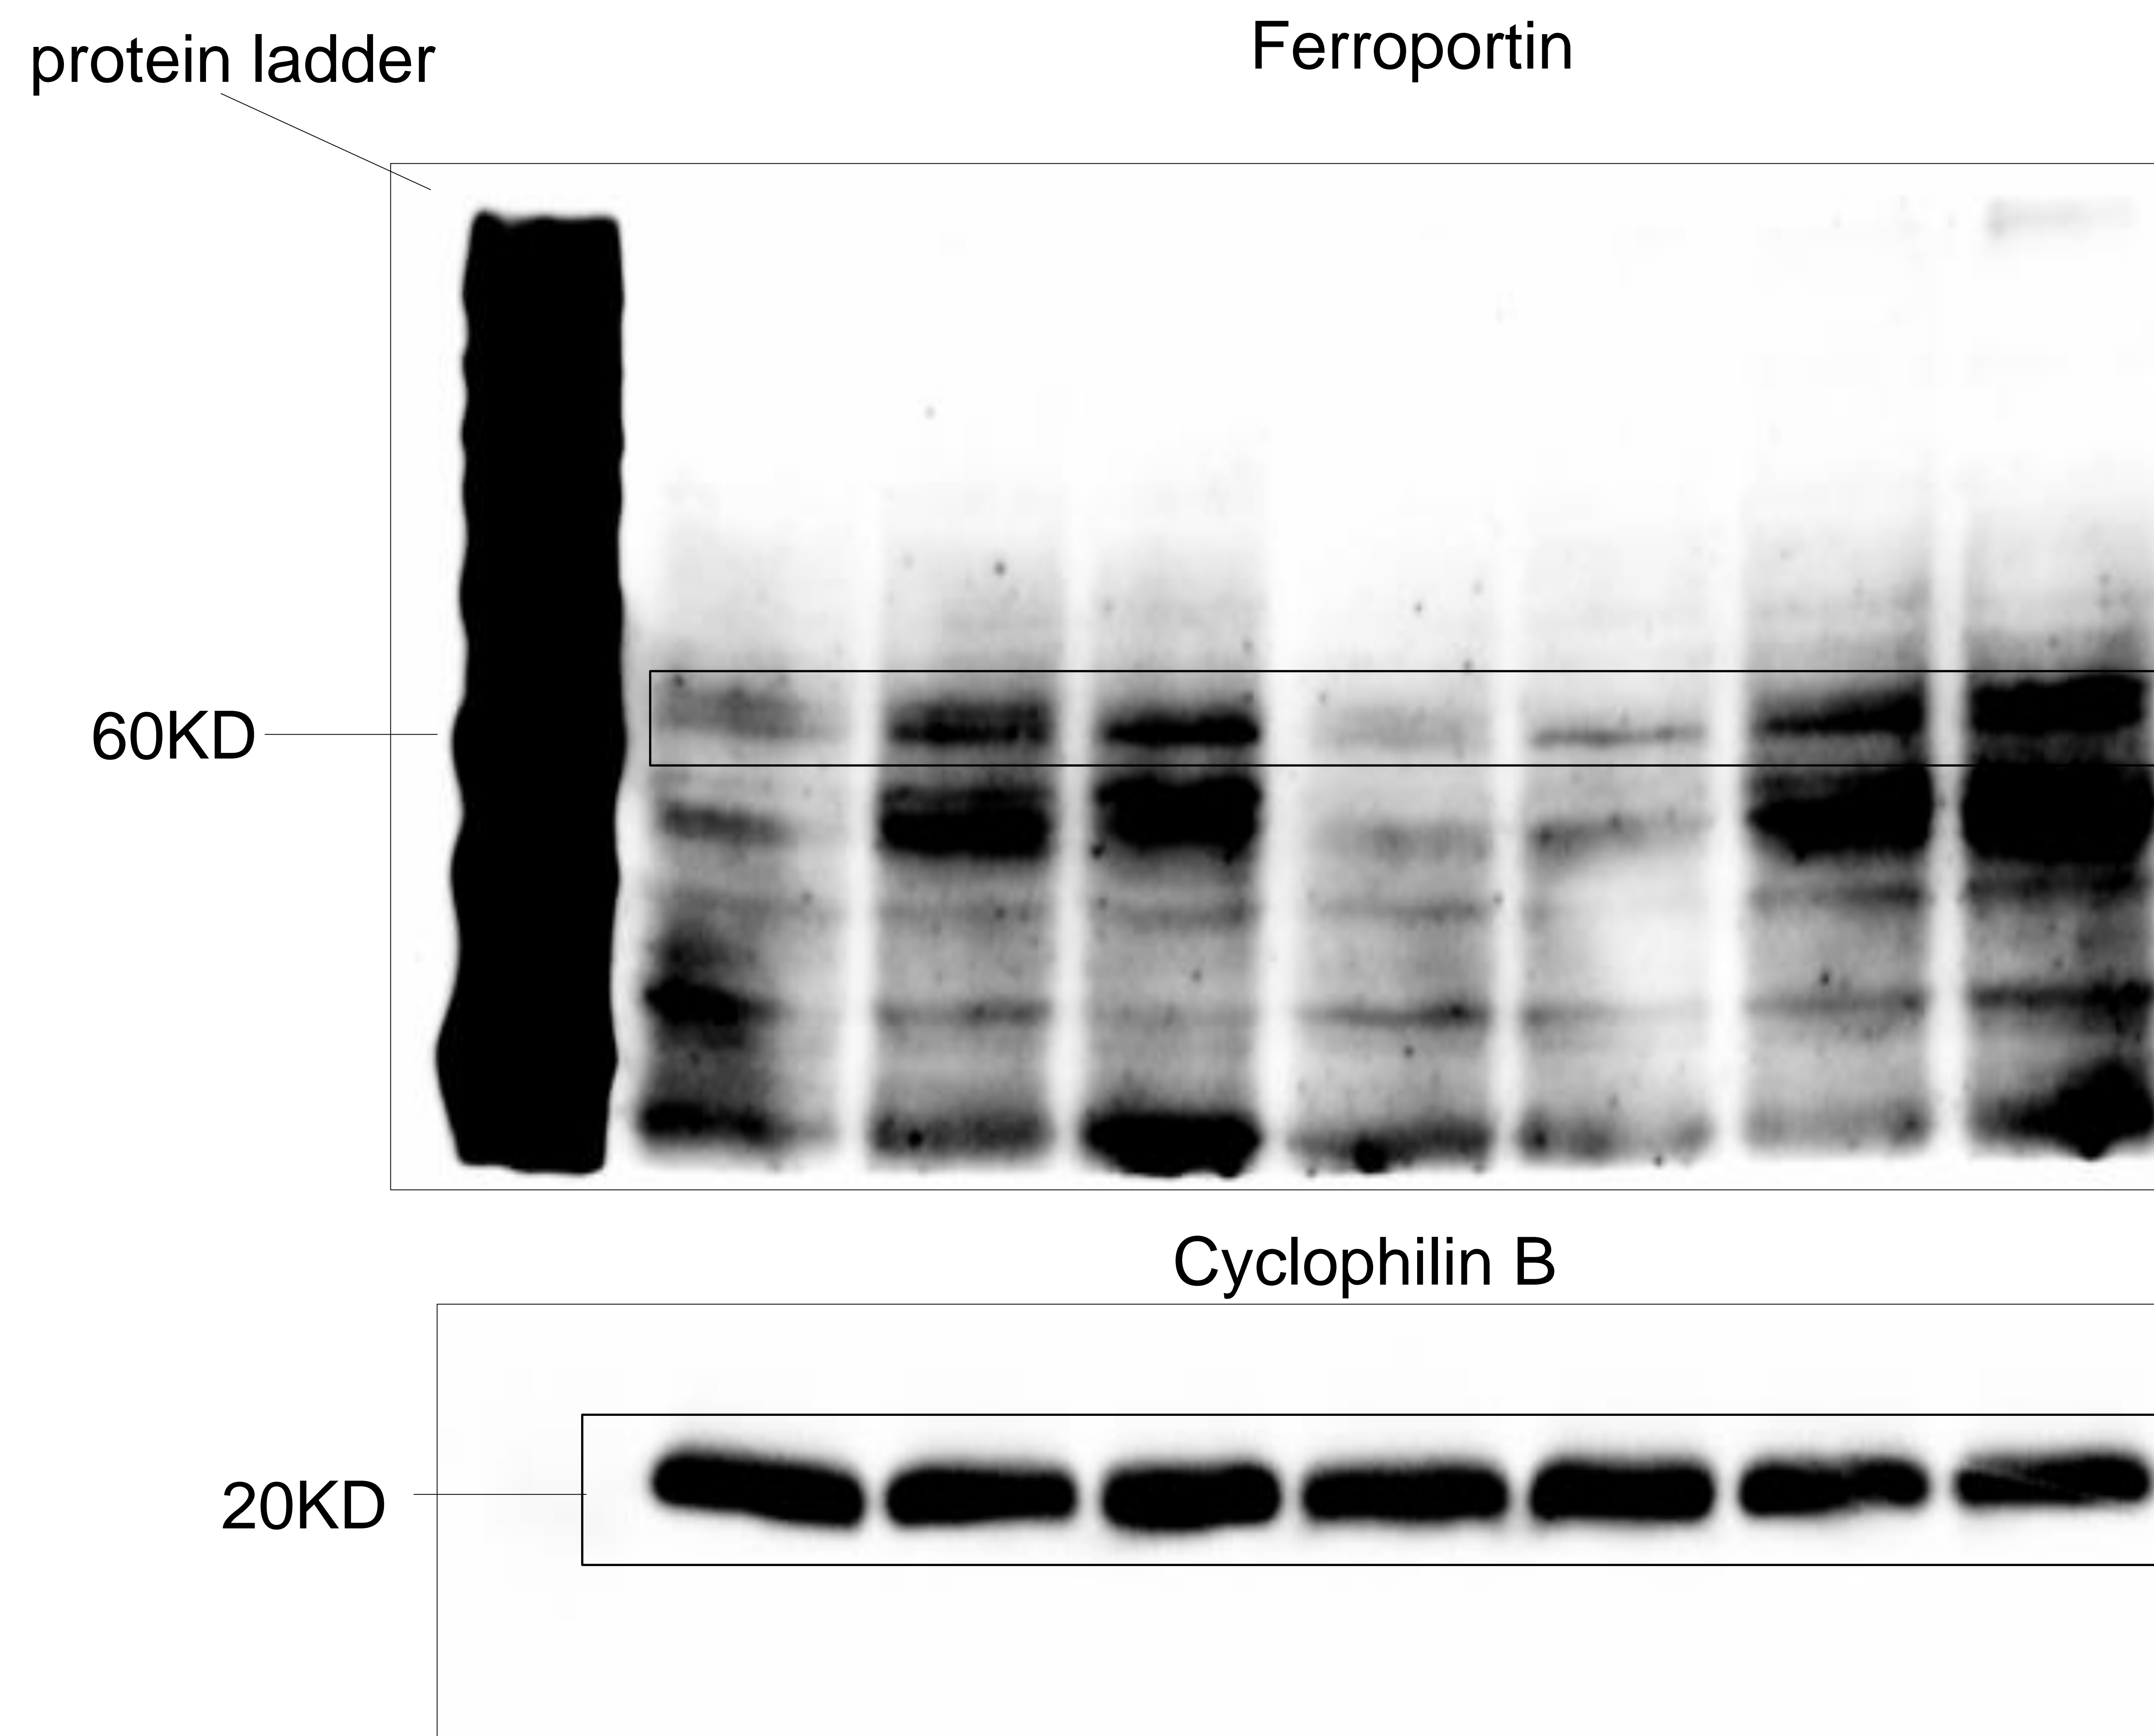

# Figure 3D

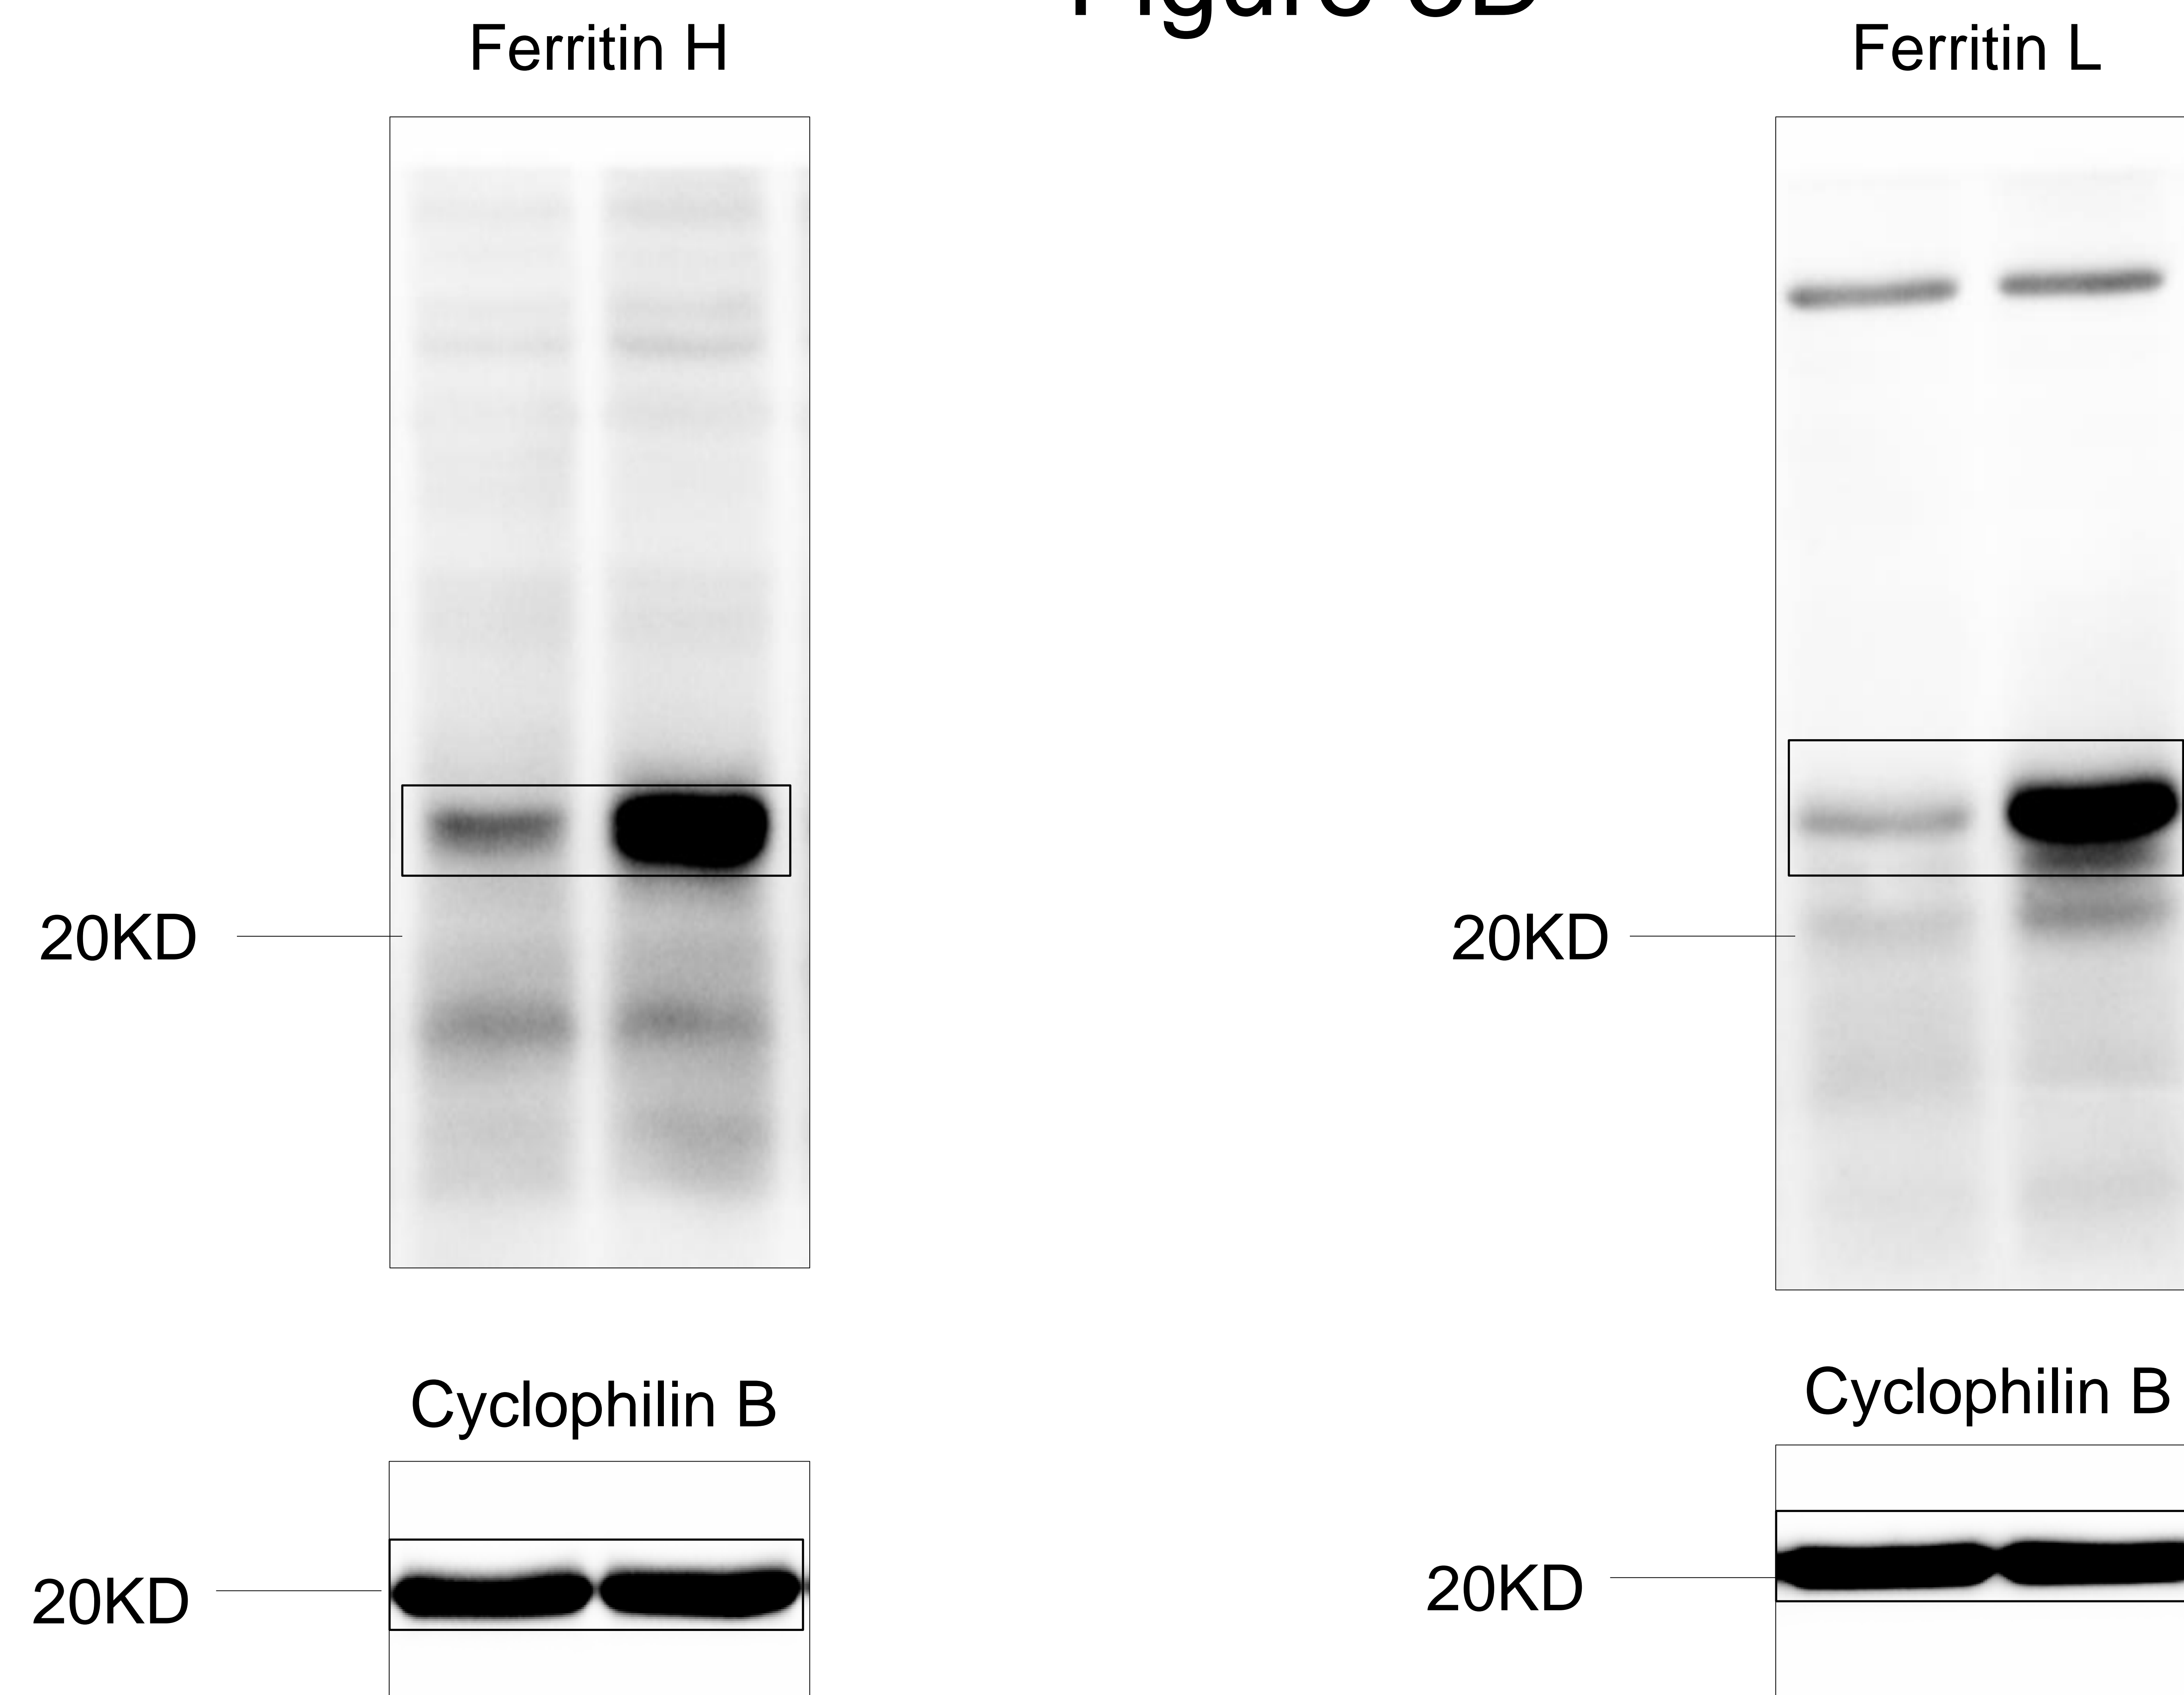

Figure 4B

Hepcidin

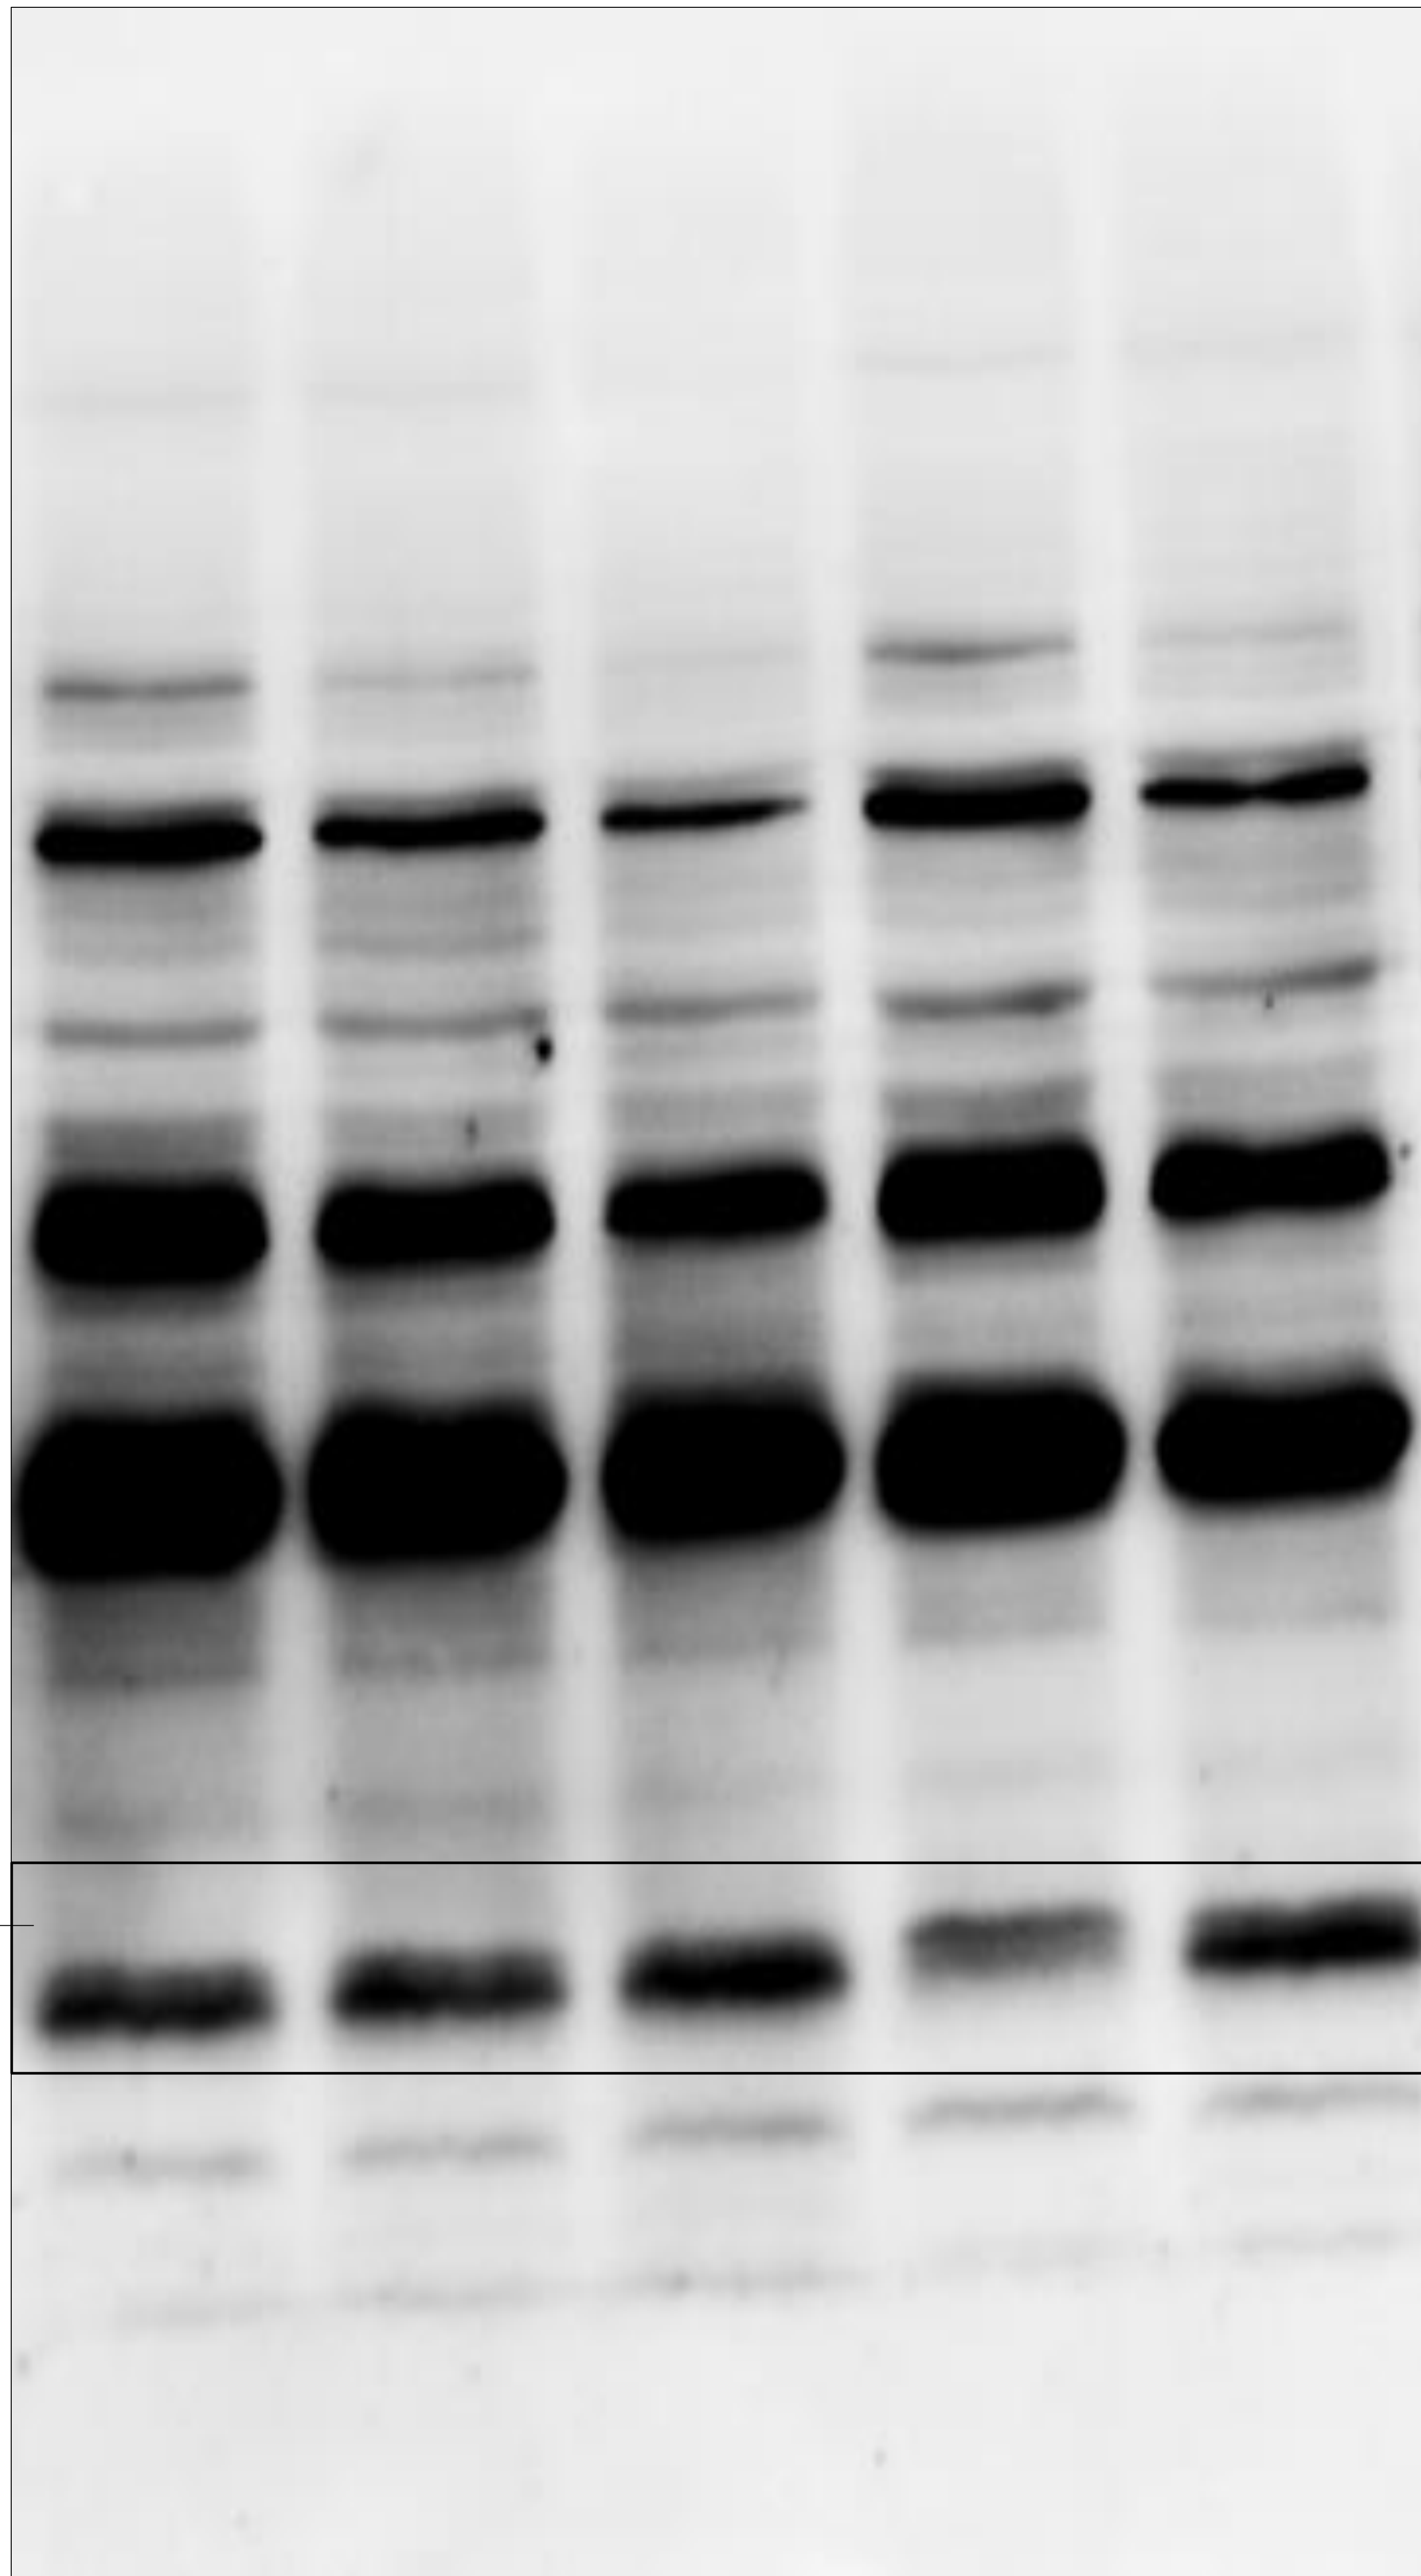

$\beta$ -actin

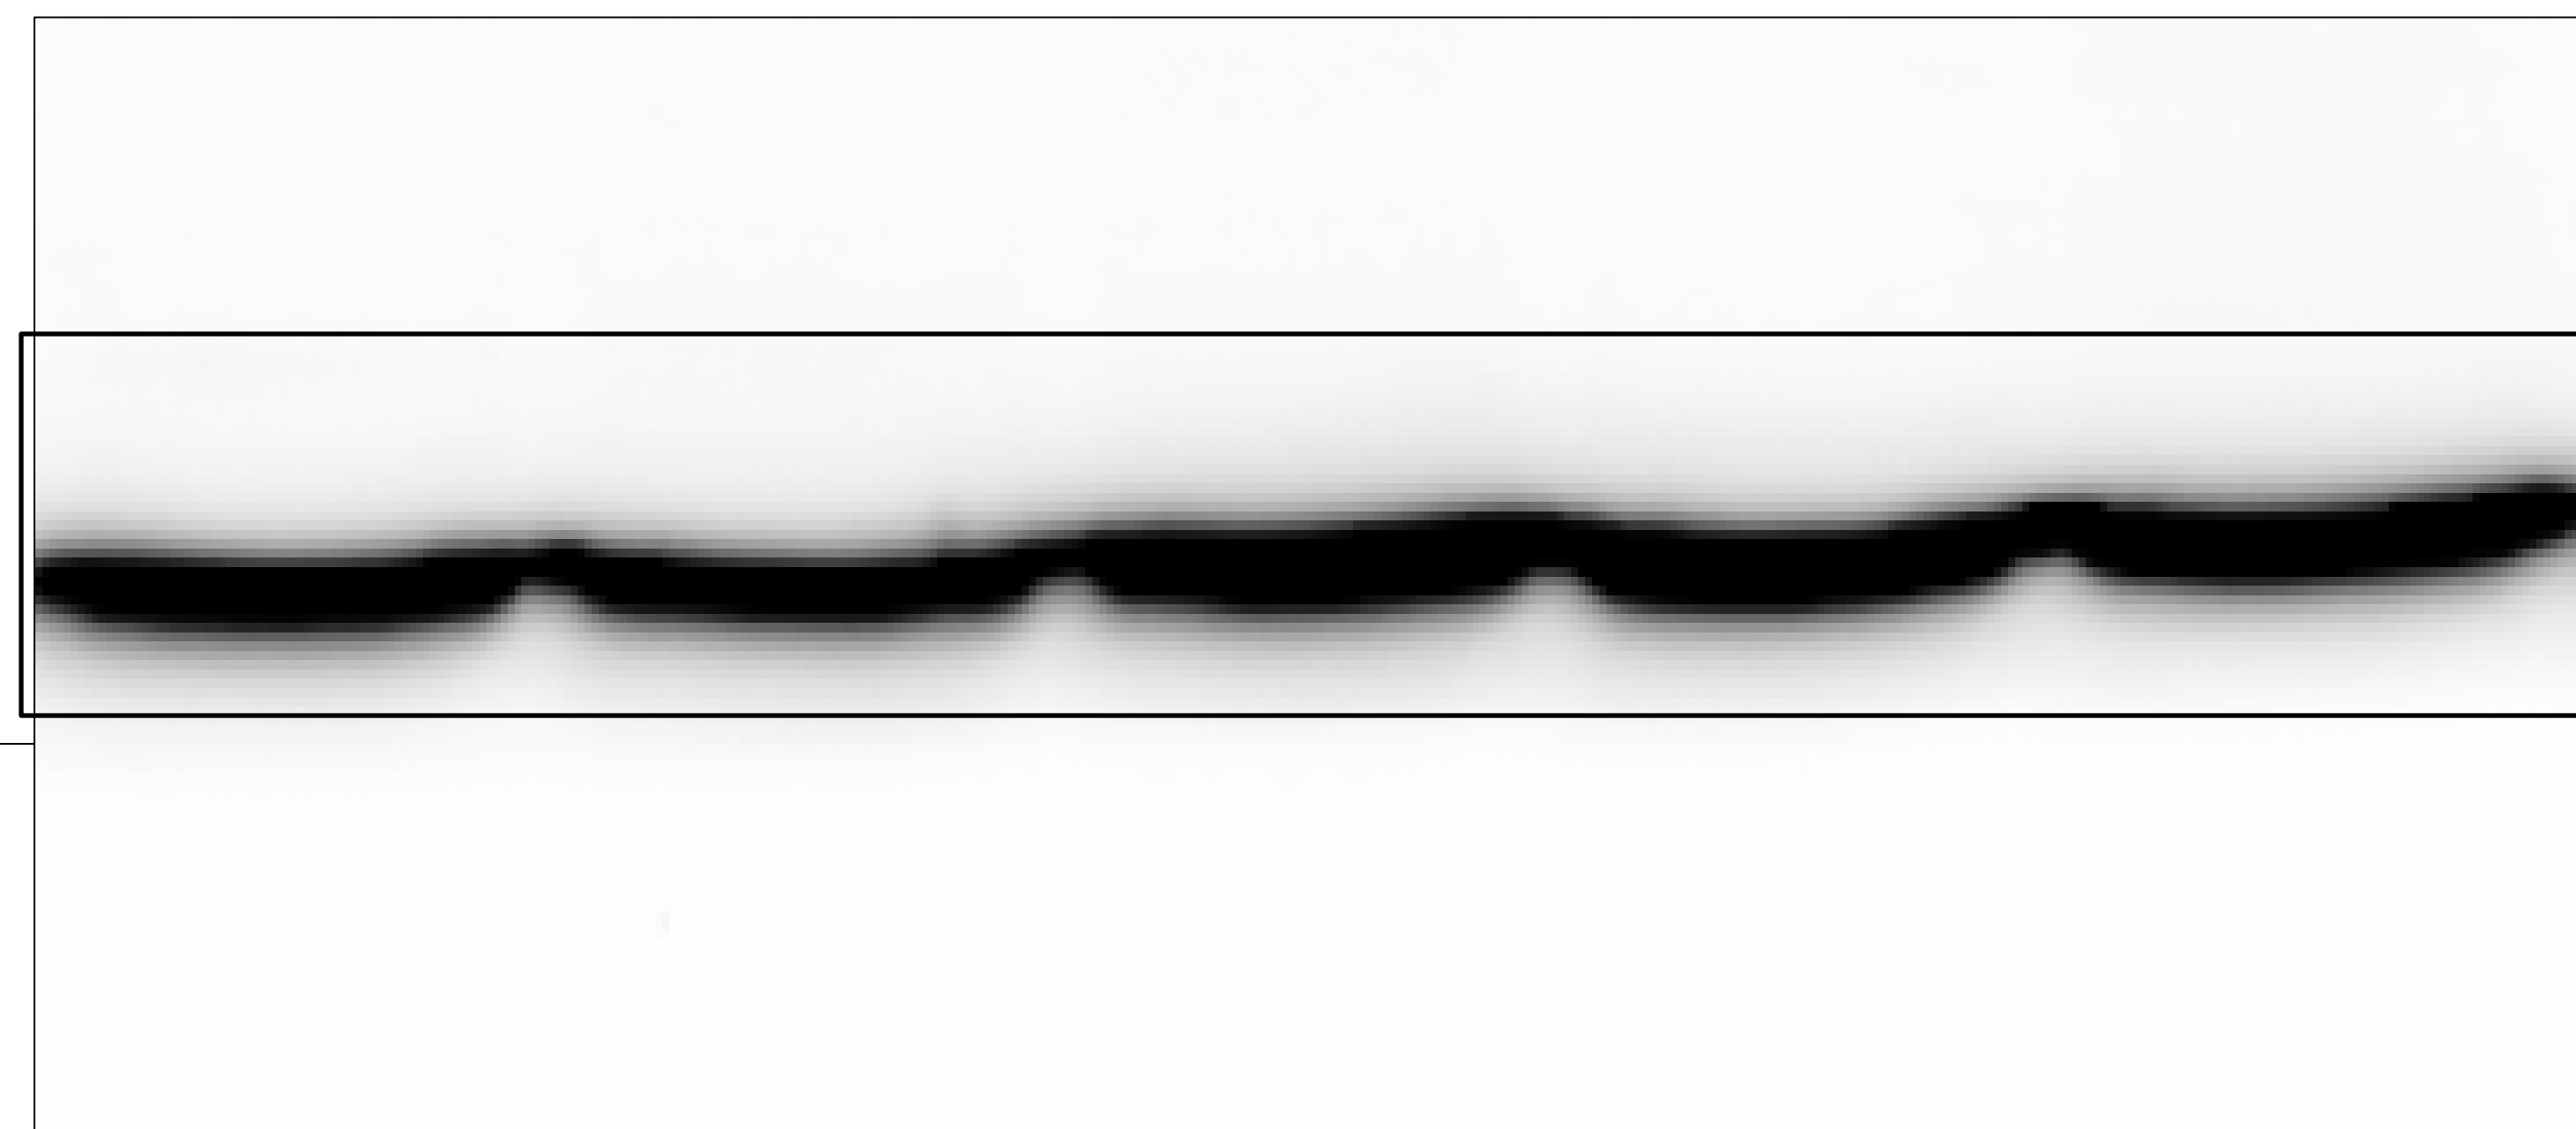

Figure 4C

pSTAT3

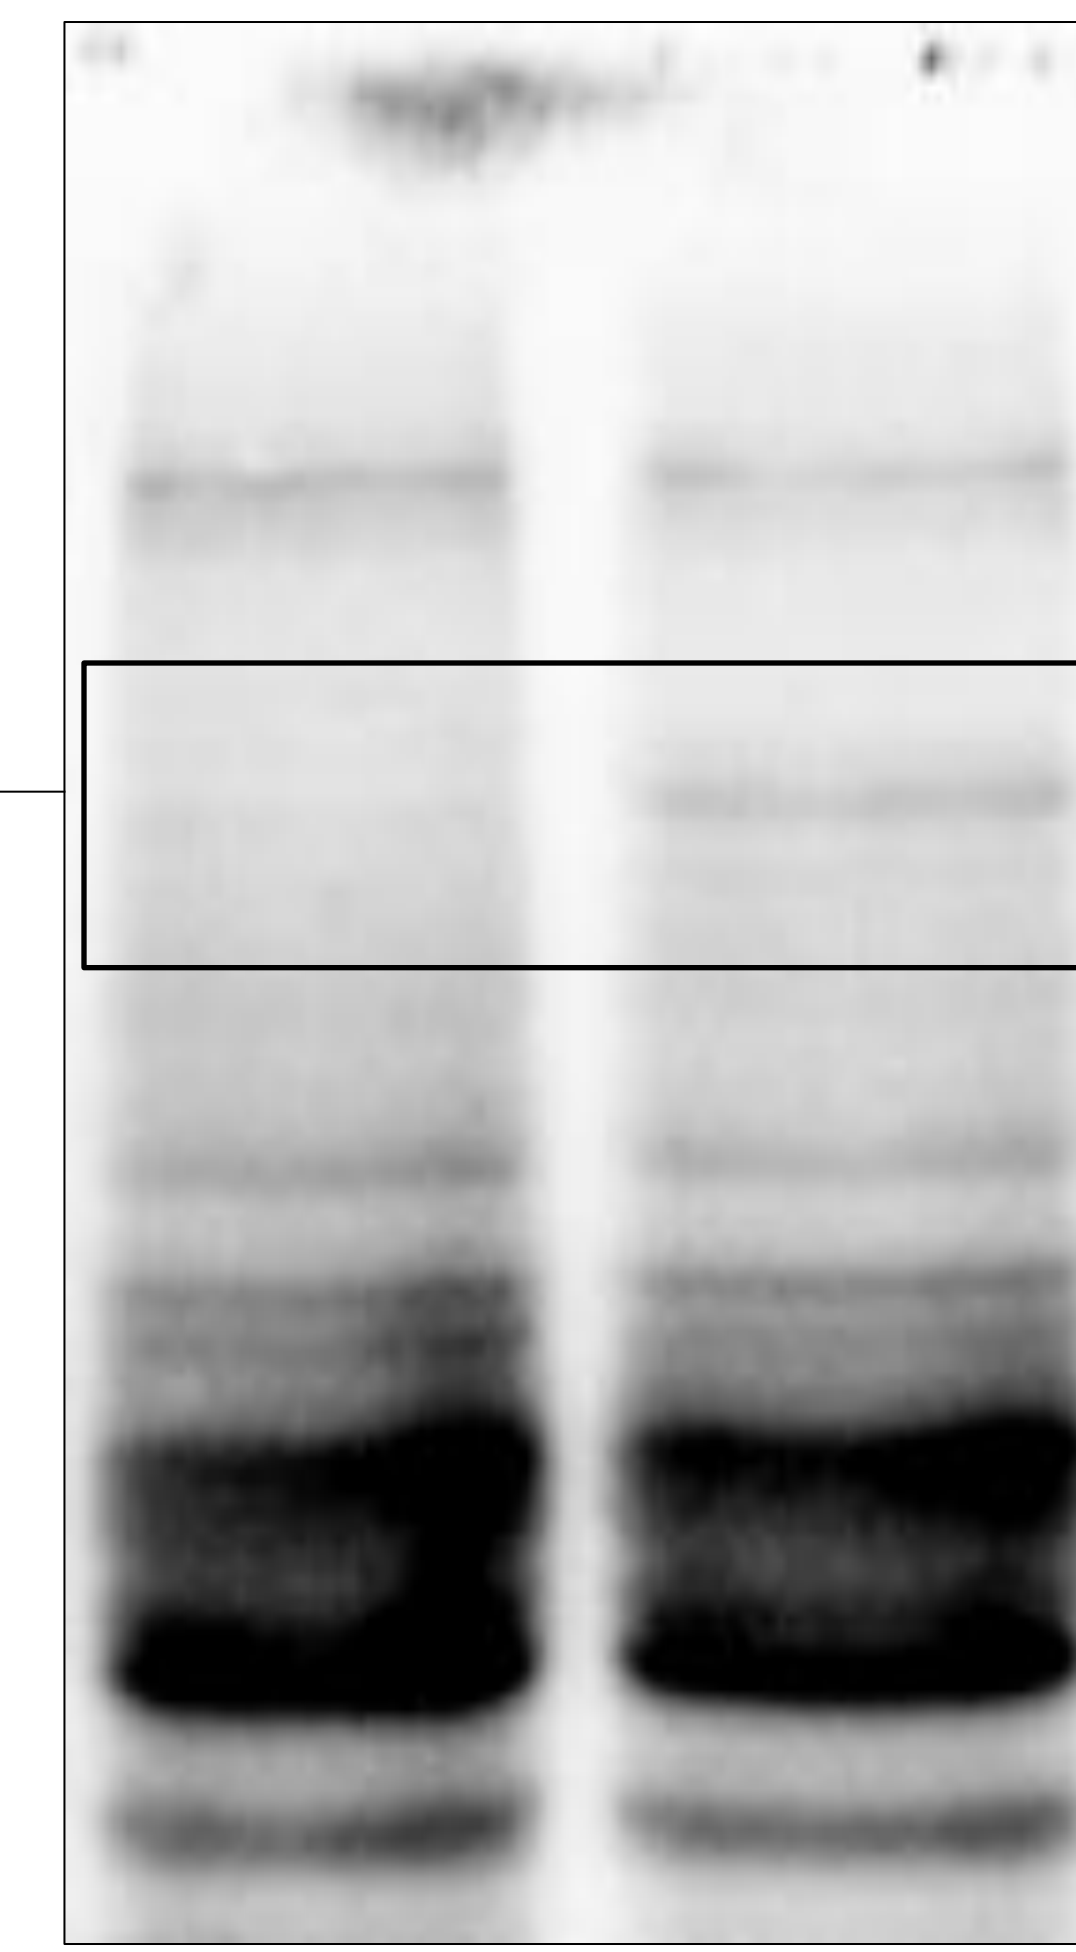

tSTAT3

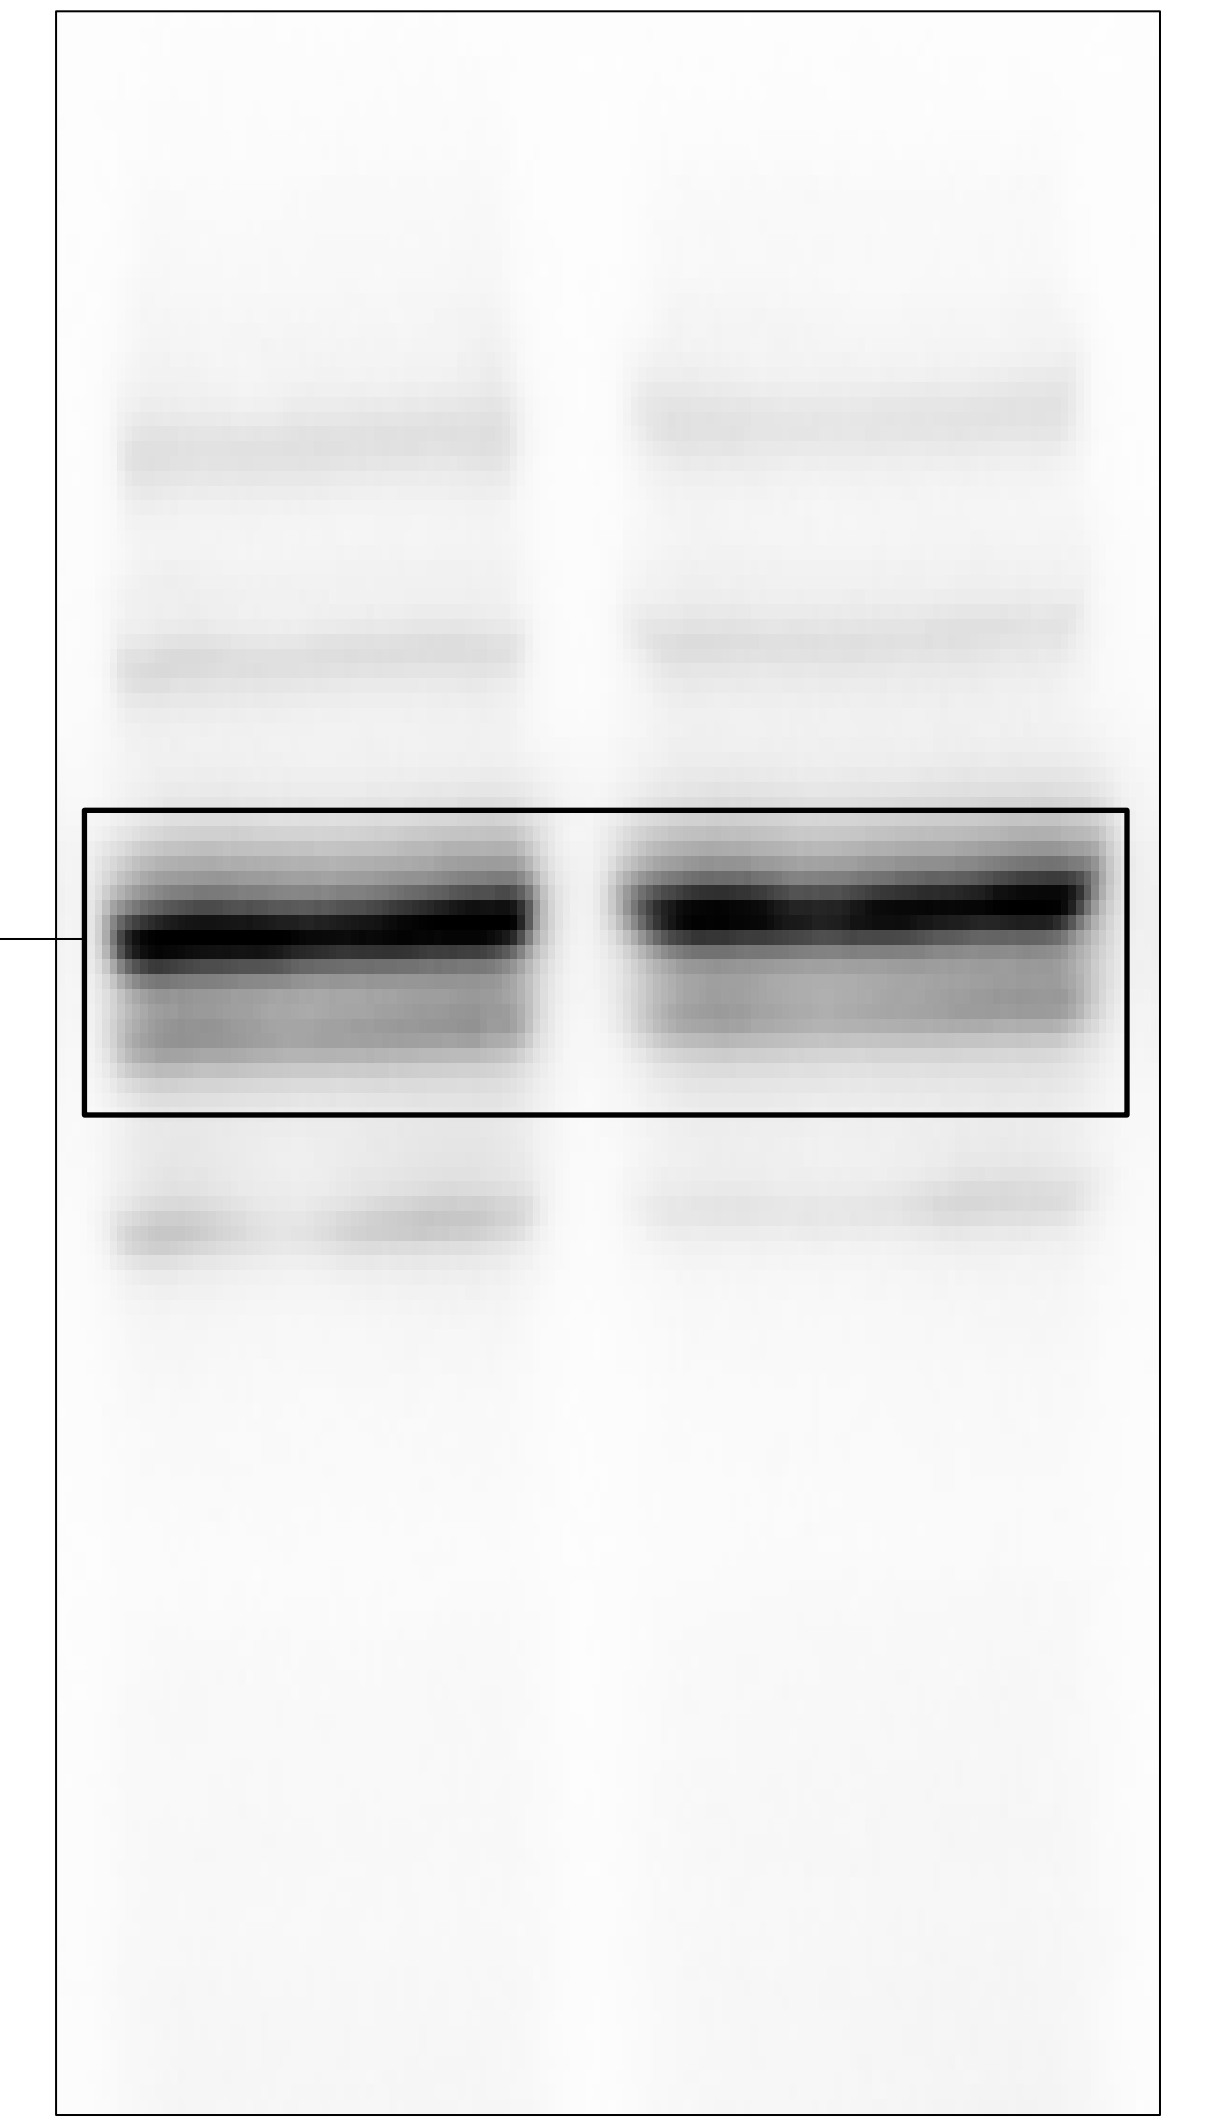

Cyclophilin B

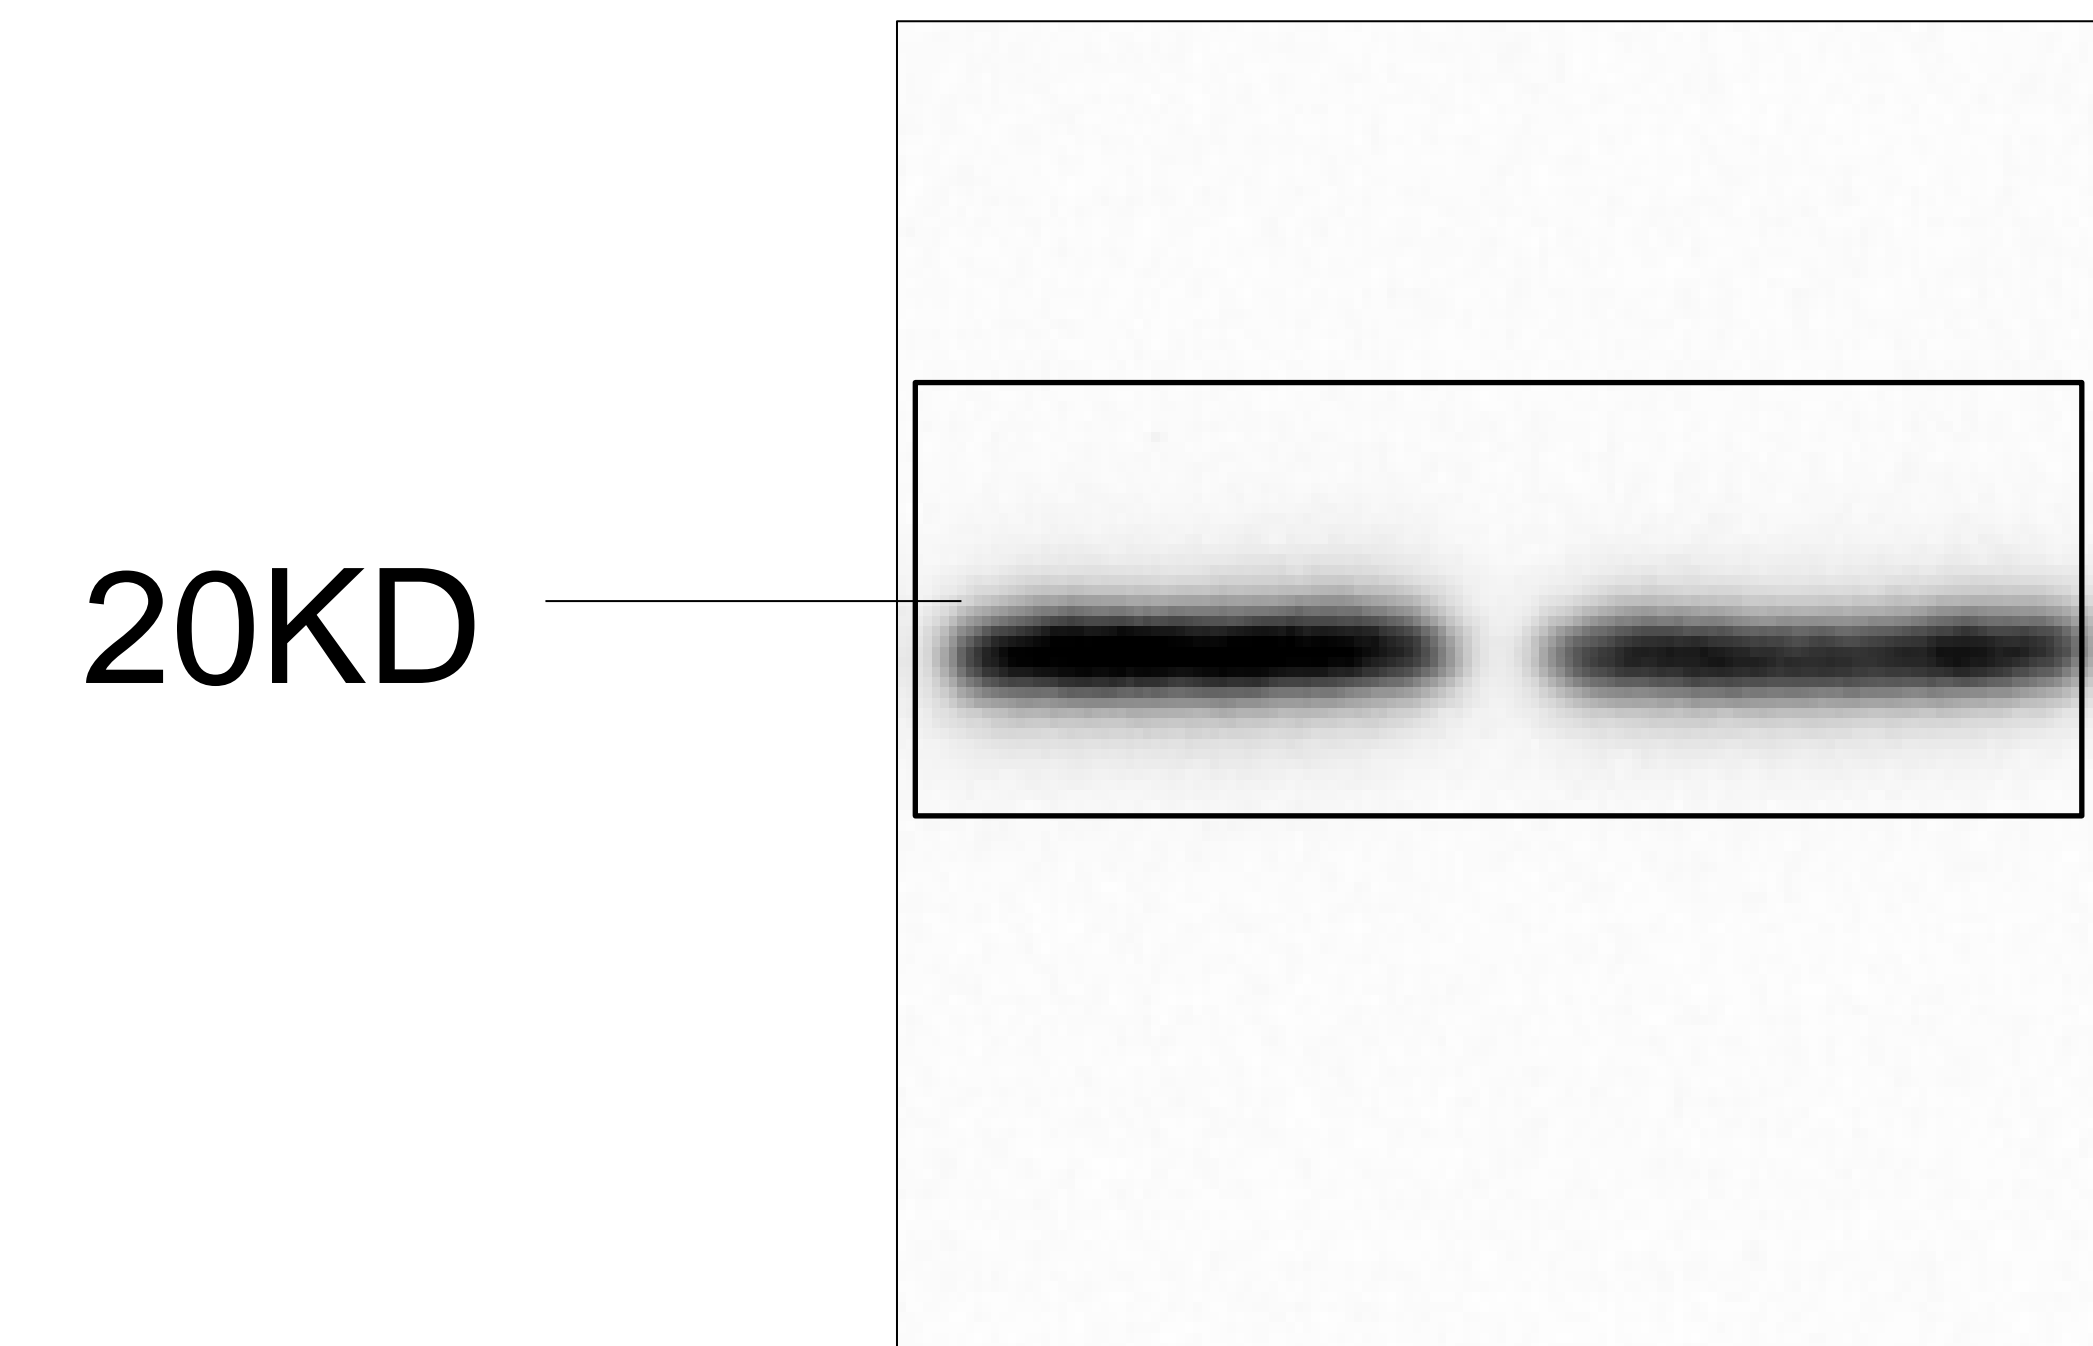

Figure 6B

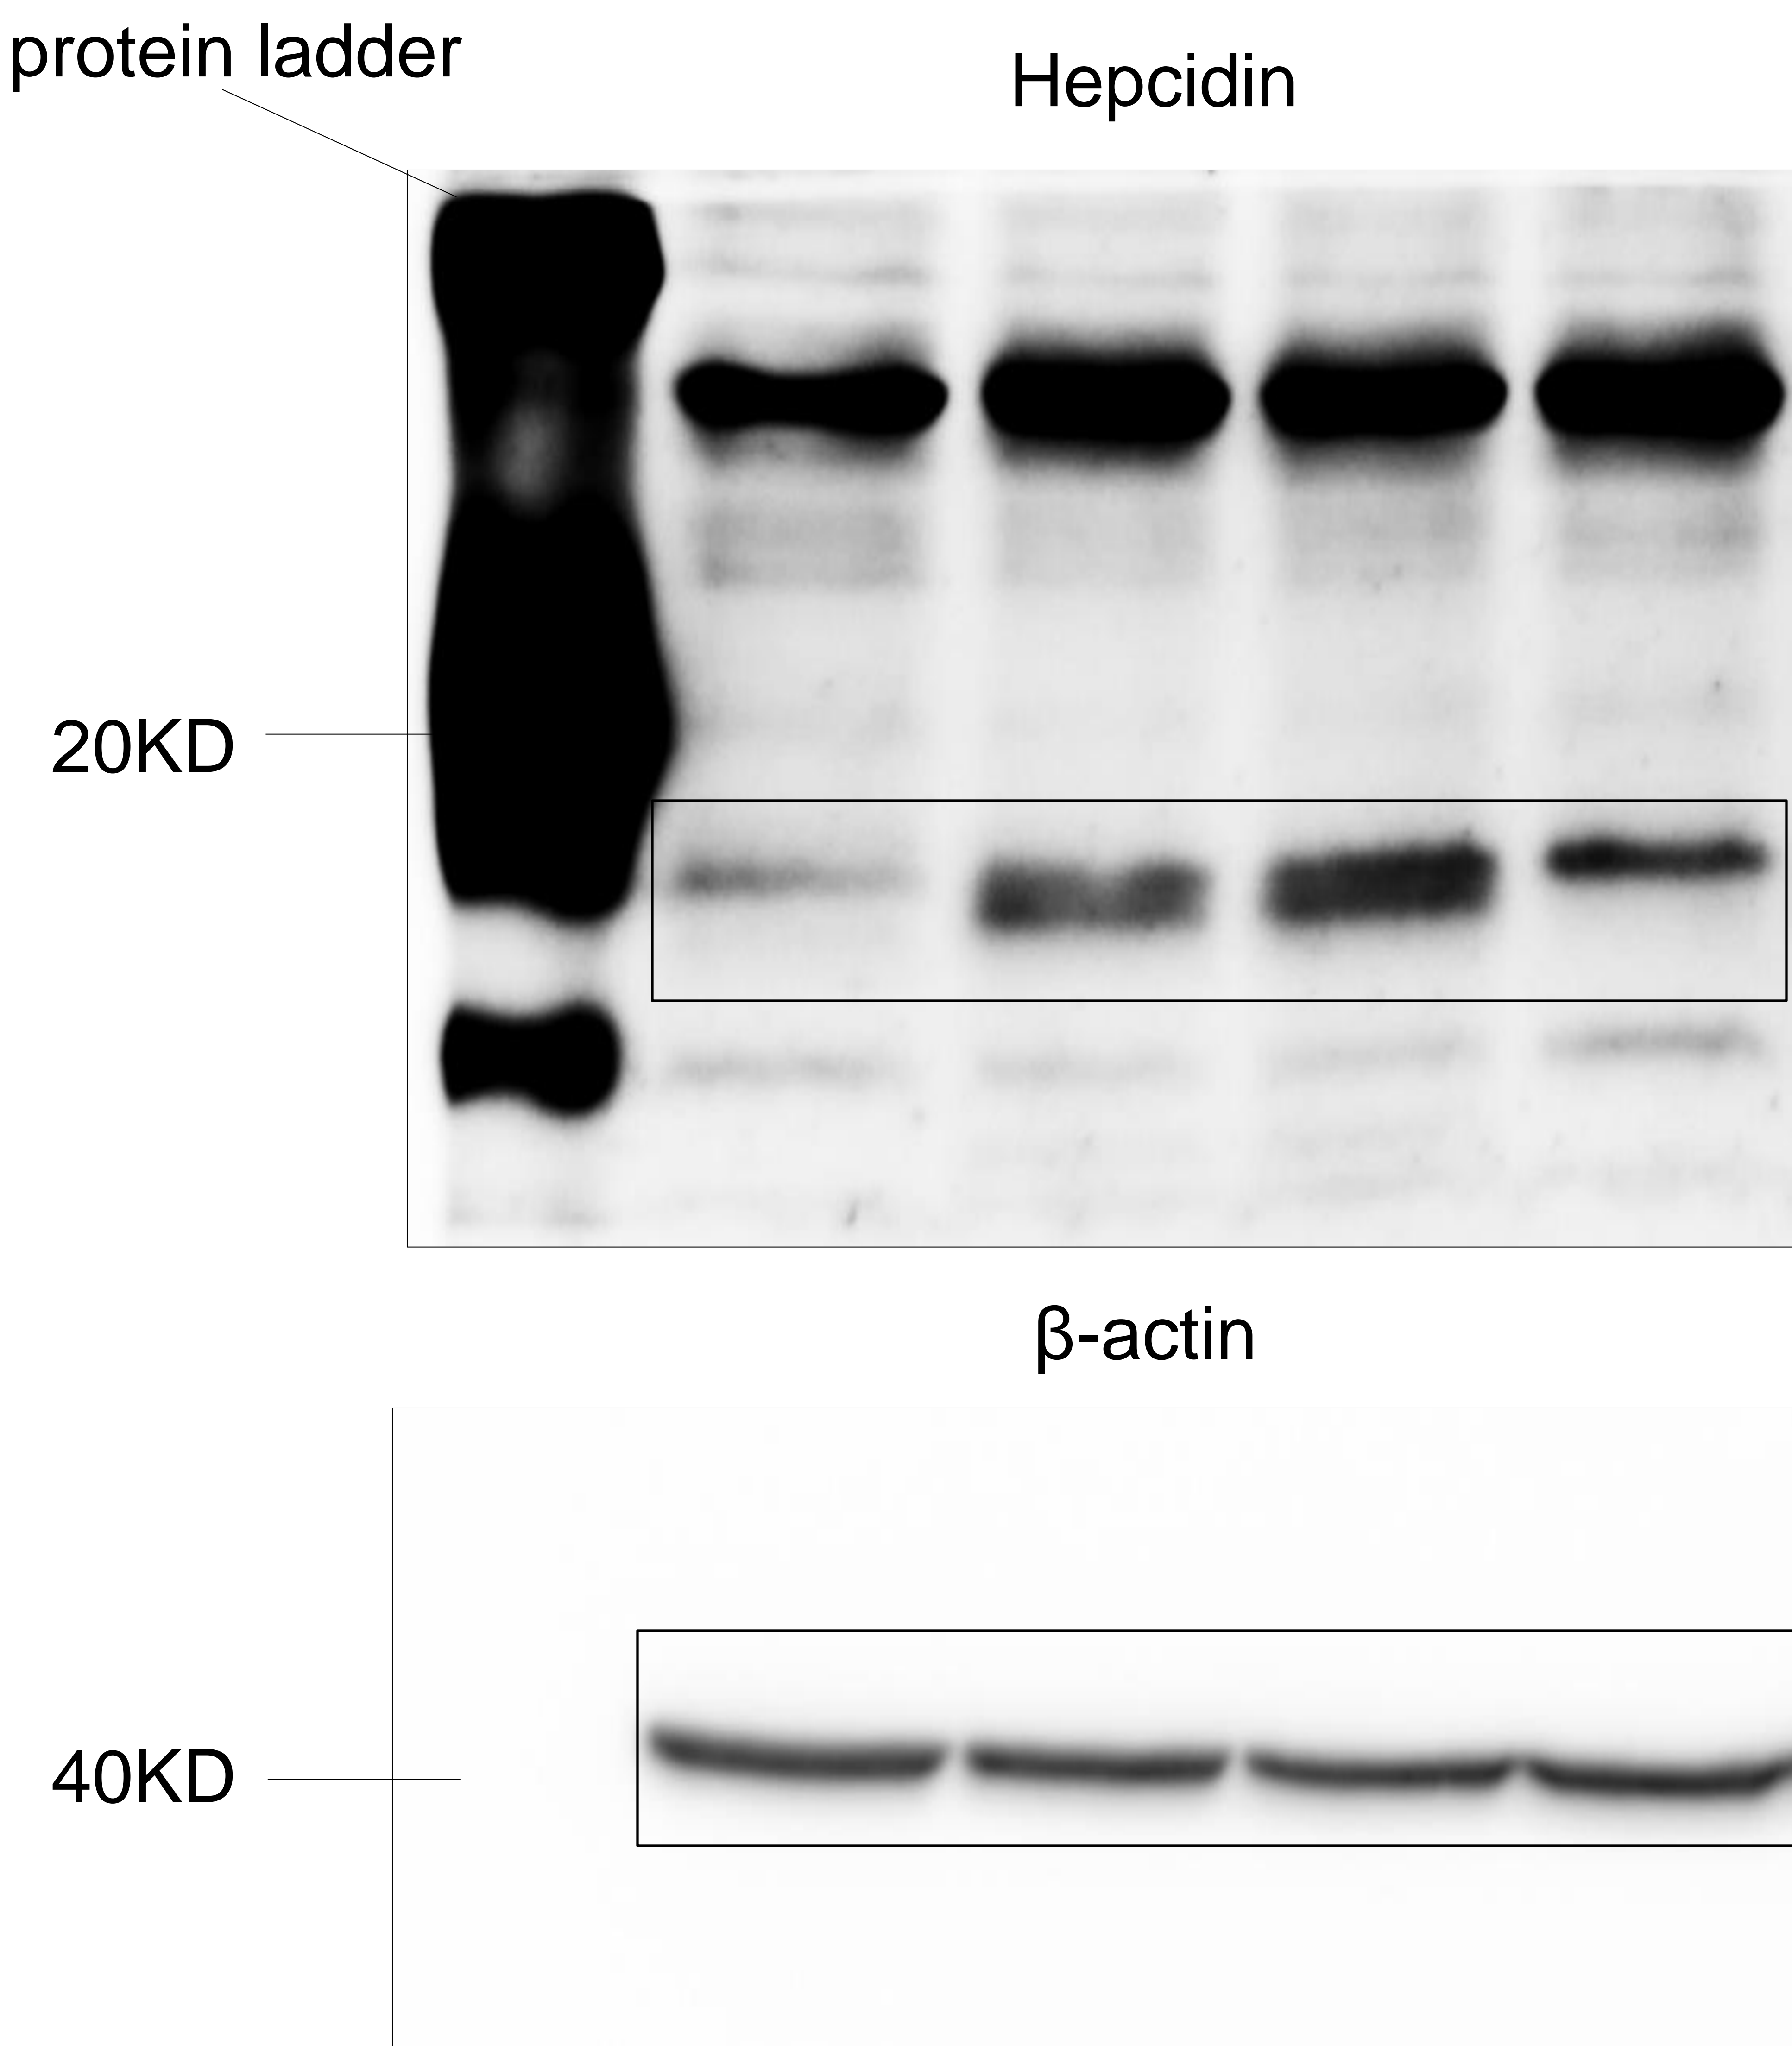

Figure 6C

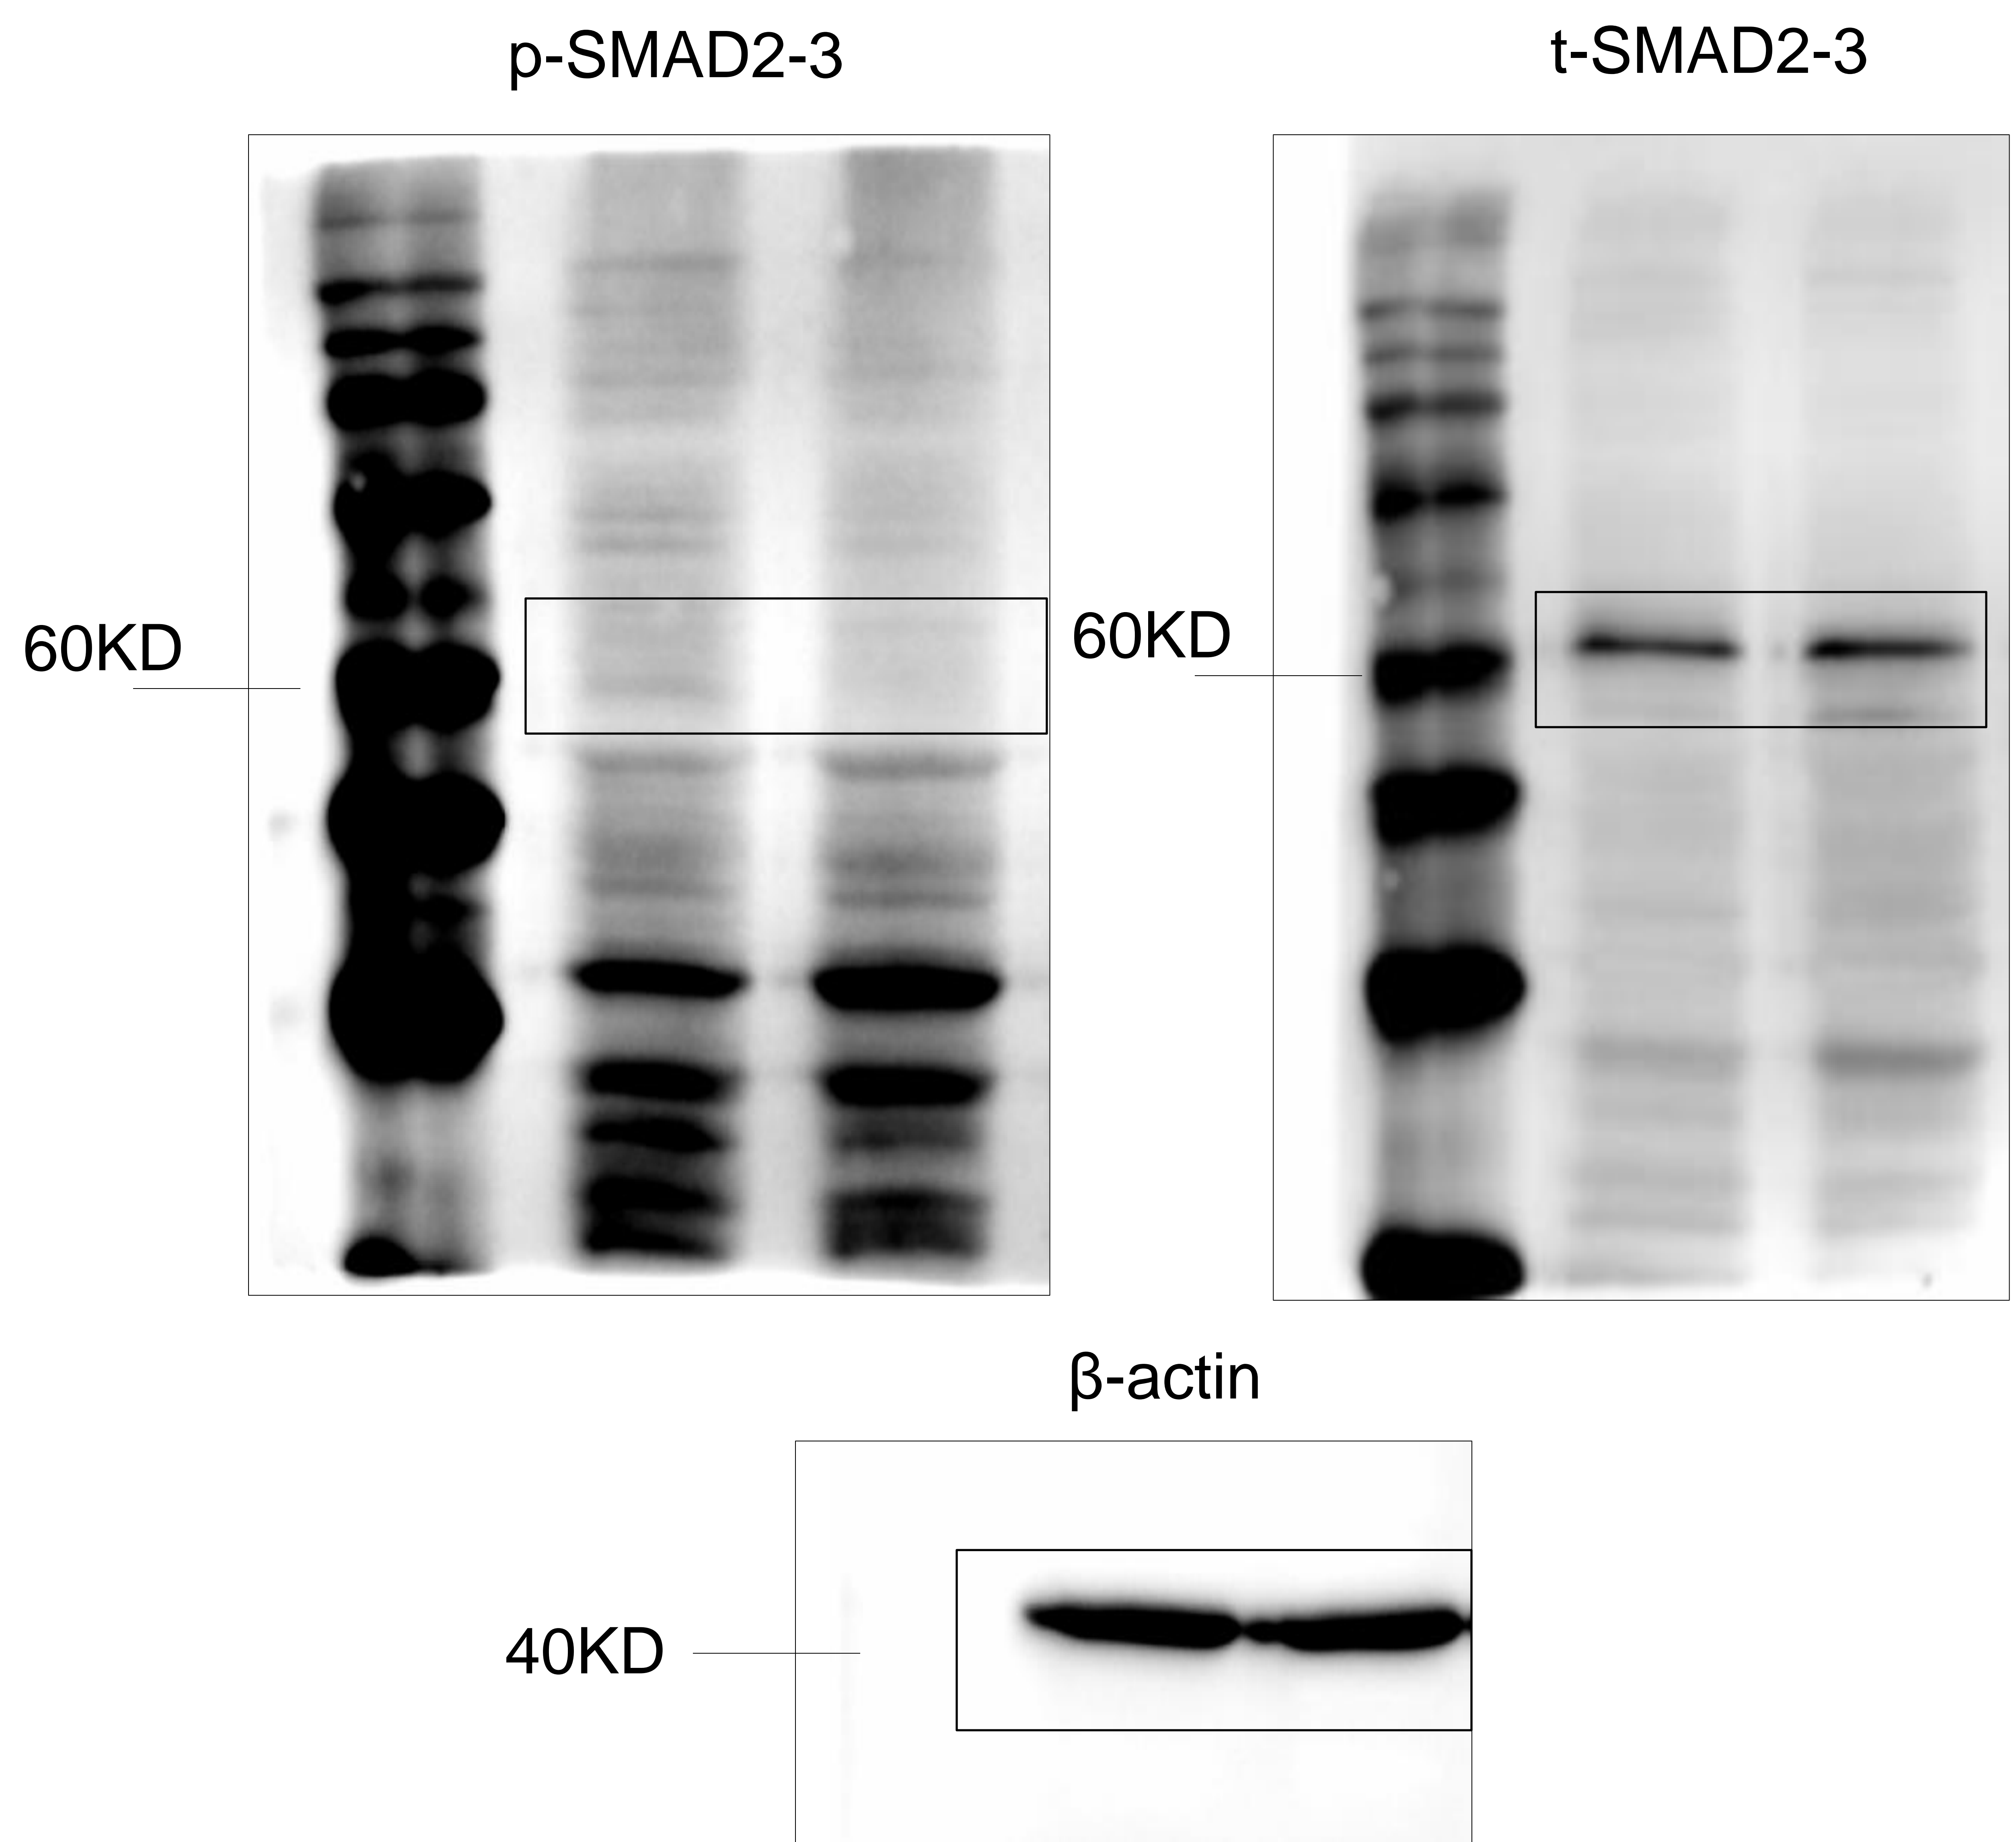

Figure 6D

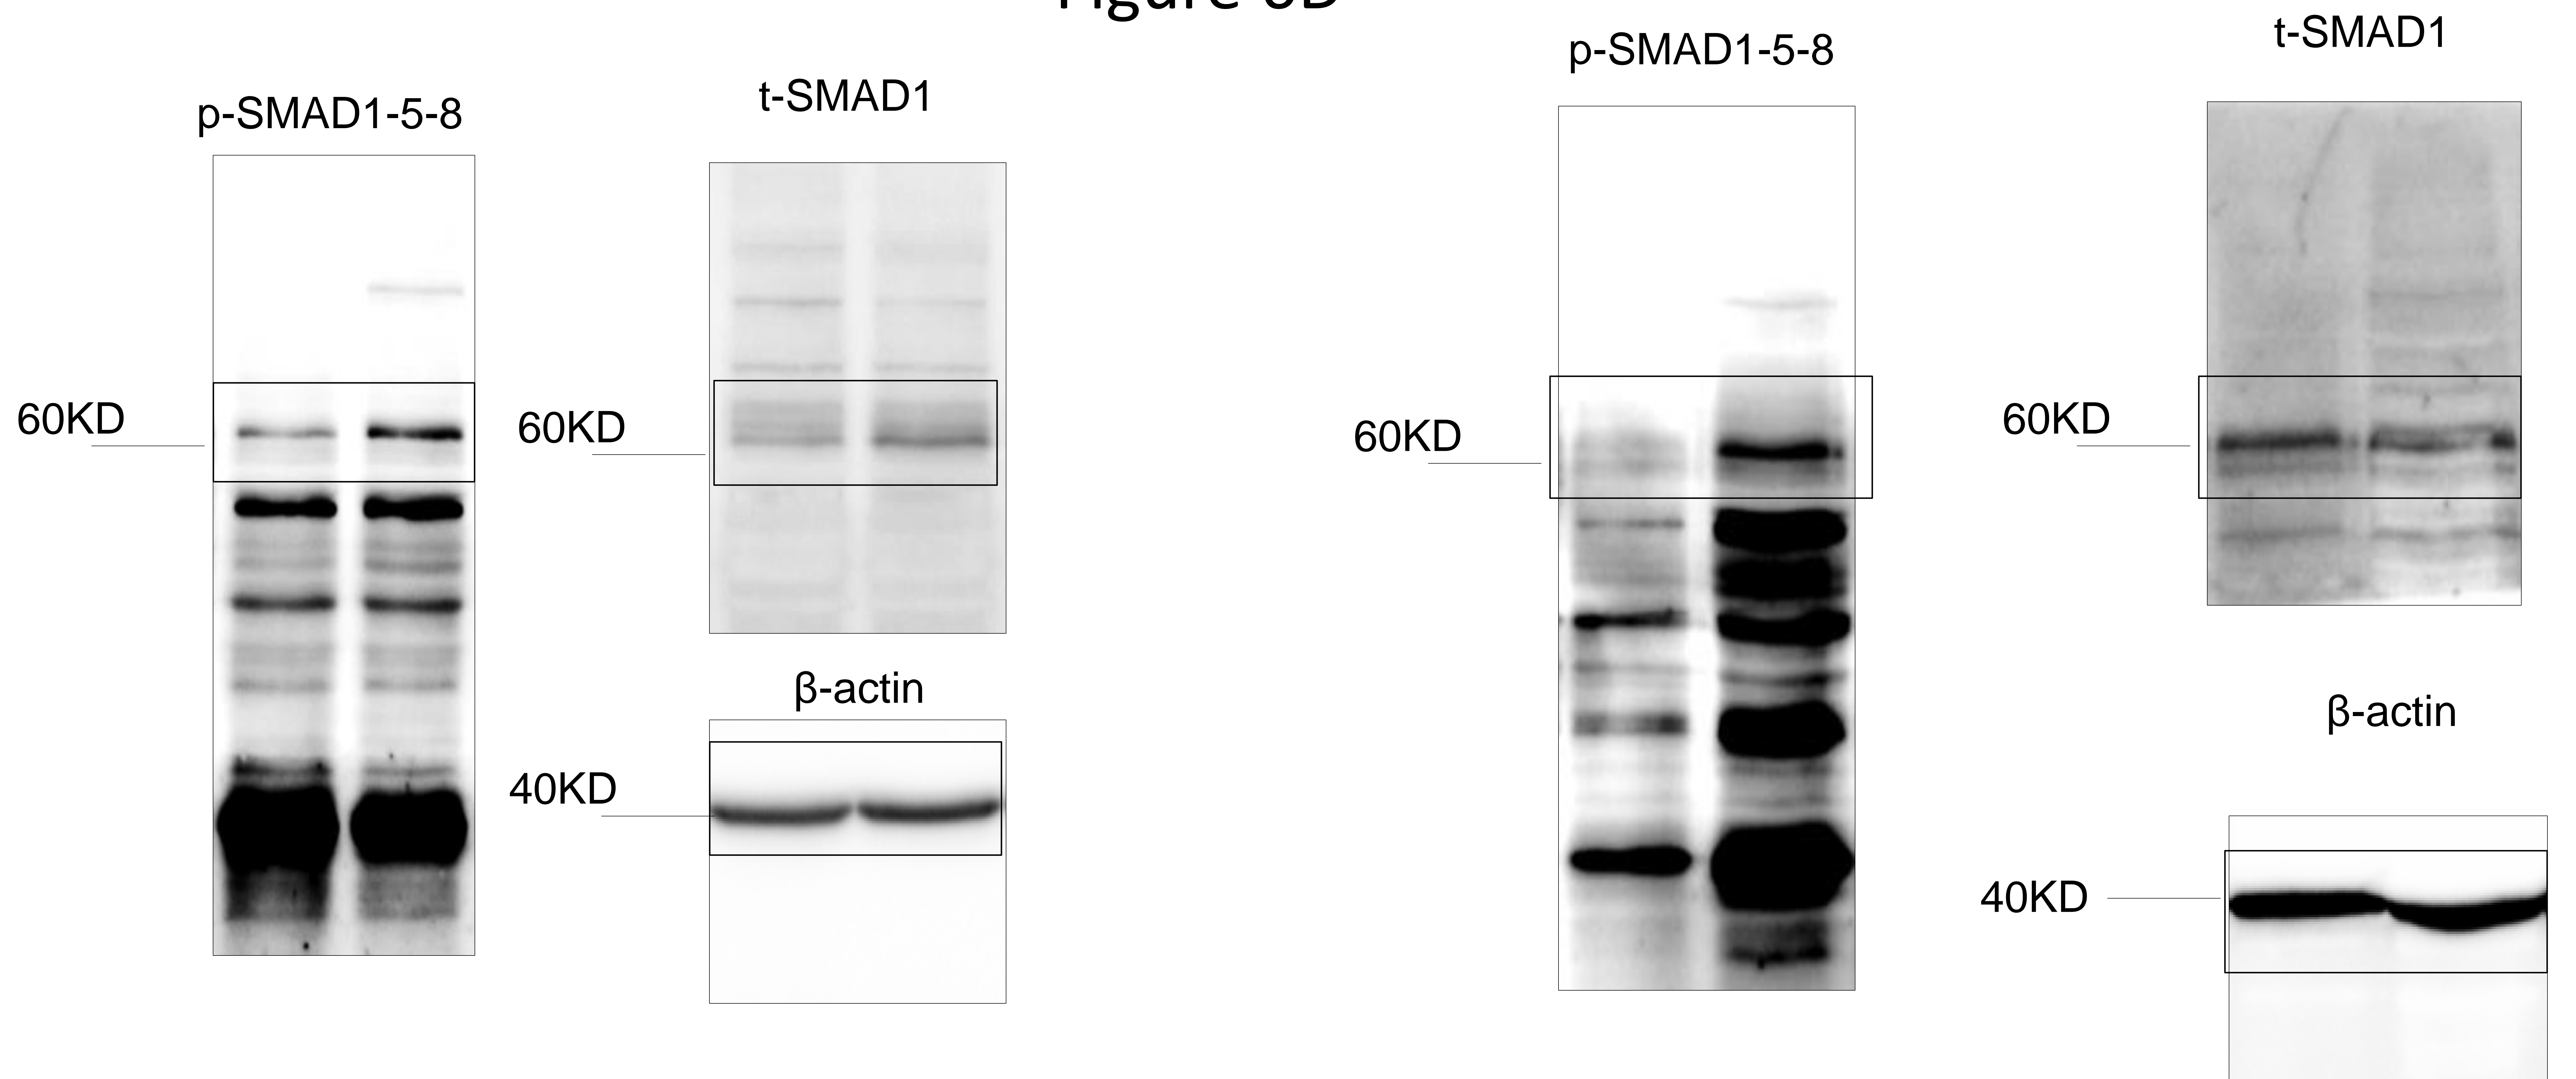

Figure 8B

Hepcidin

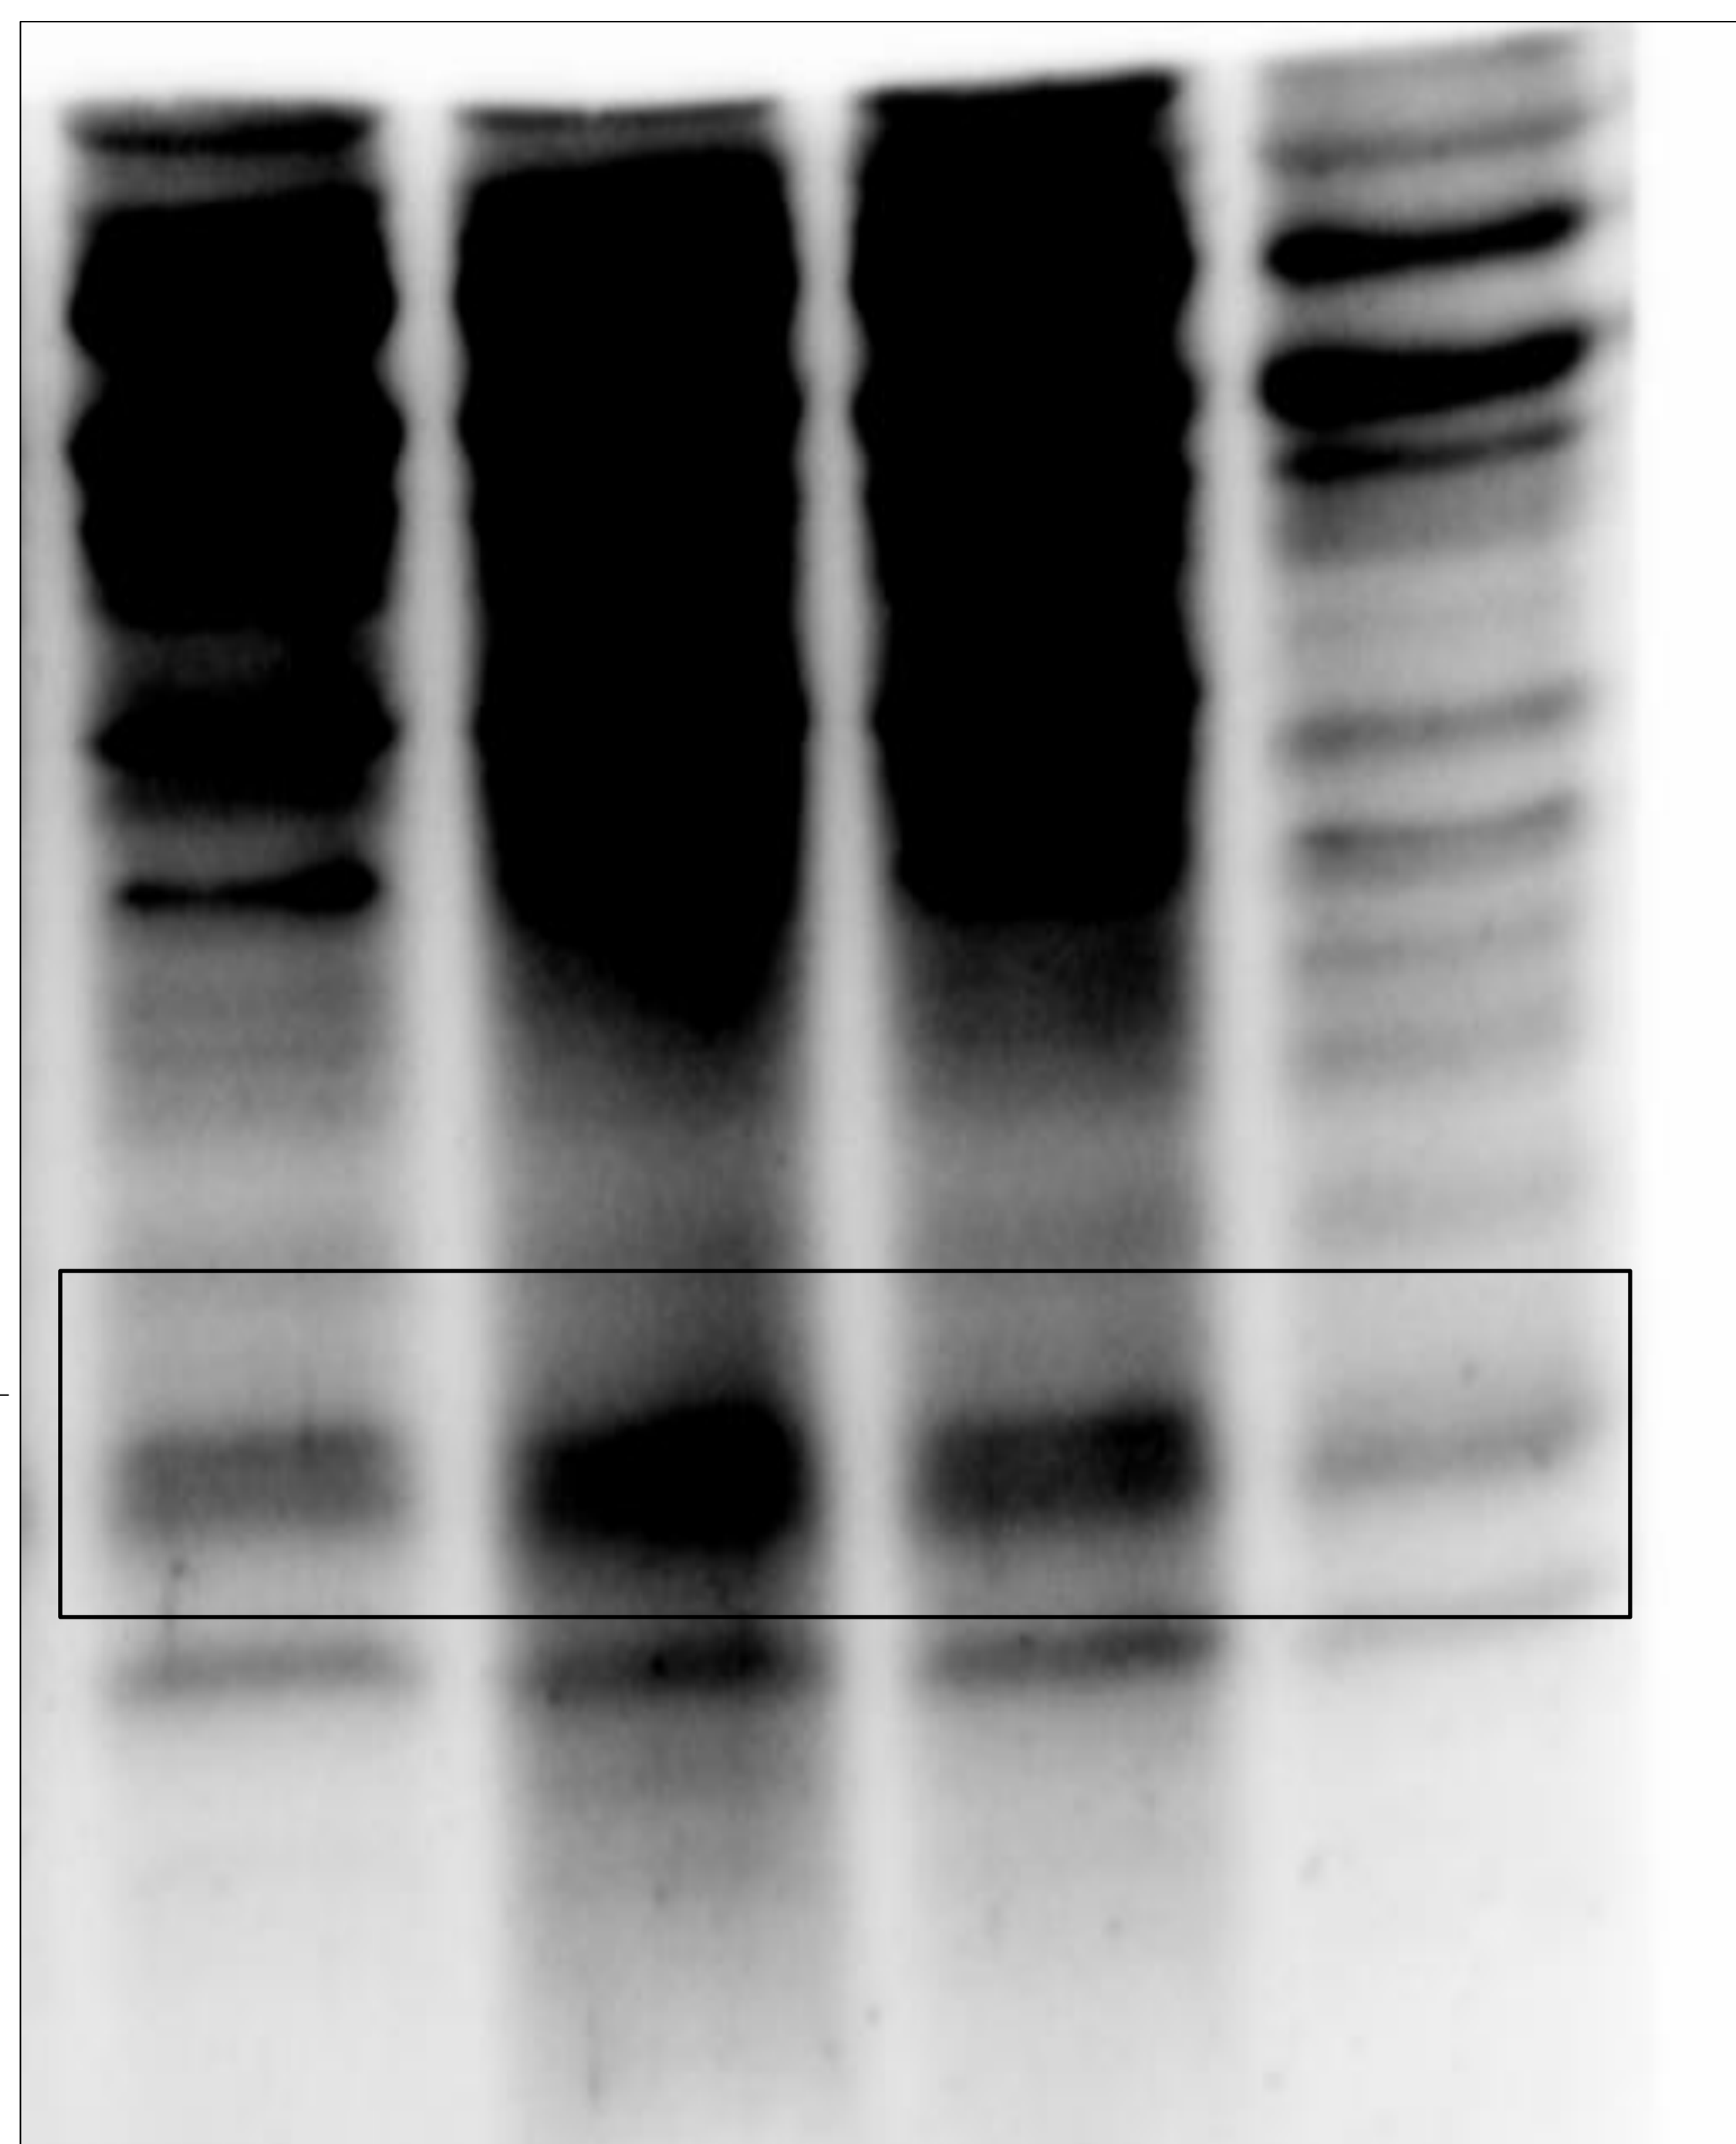

Cyclophilin B

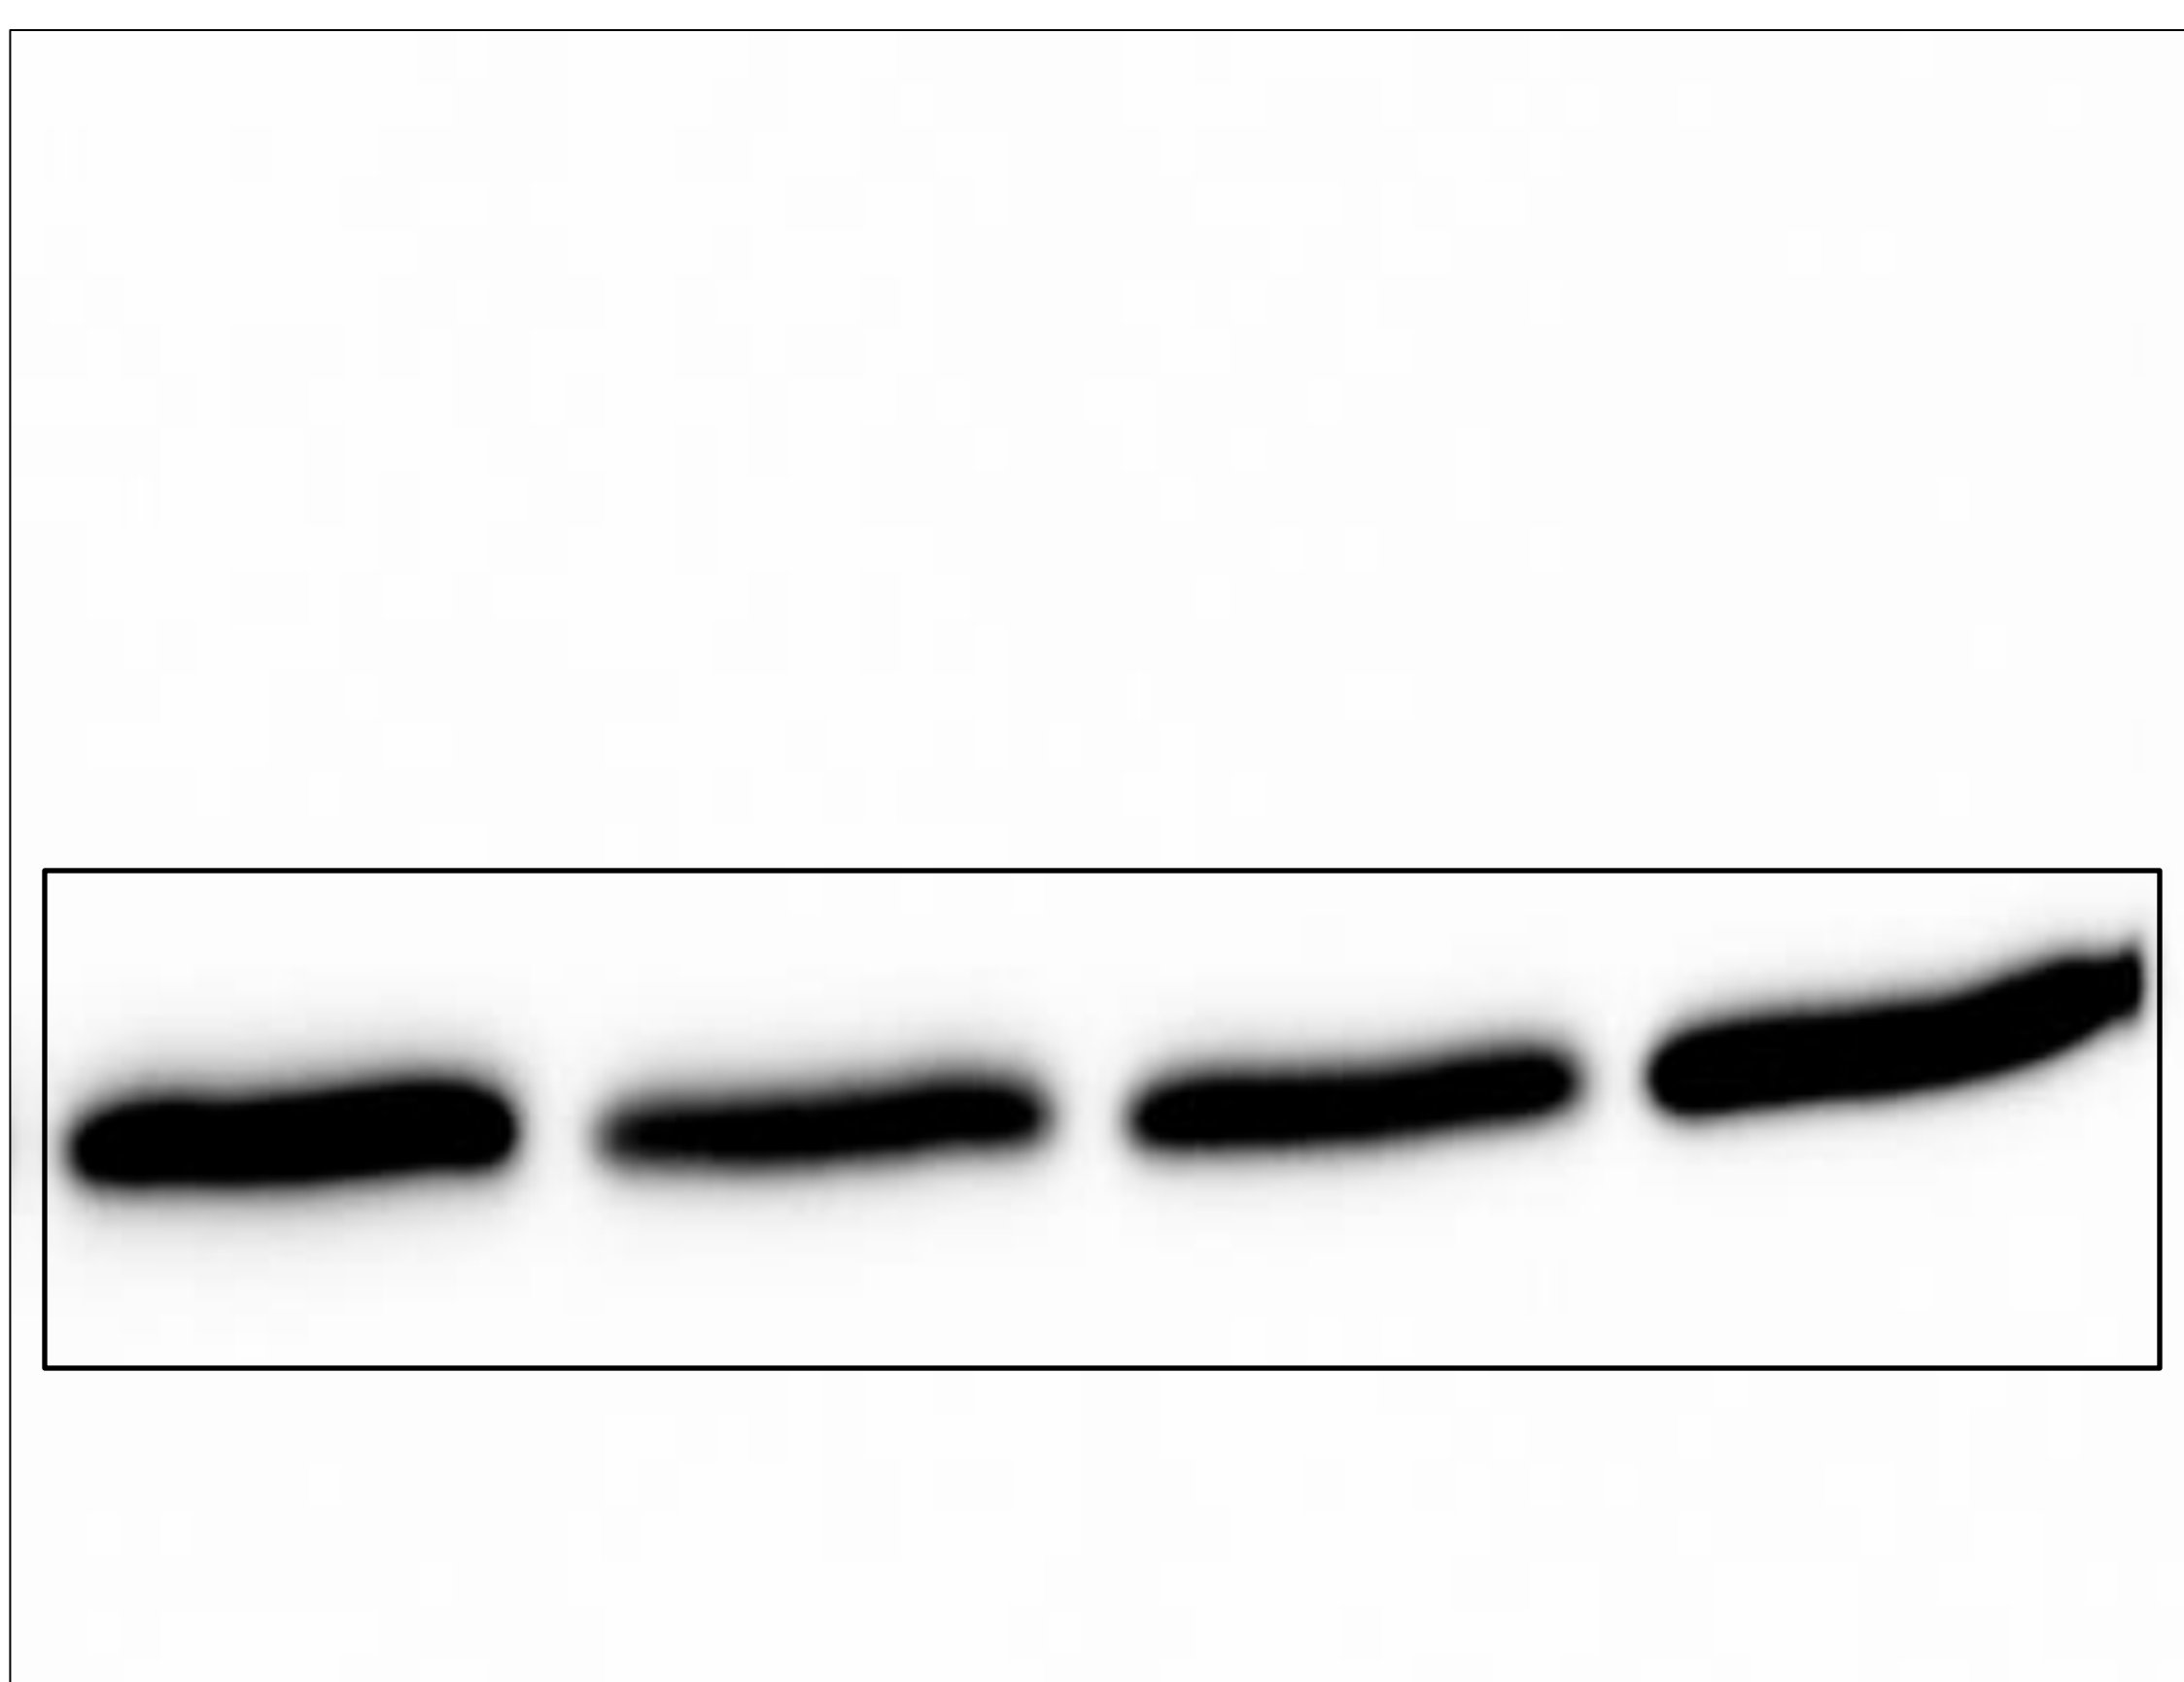

Figure 8D

pSTAT3

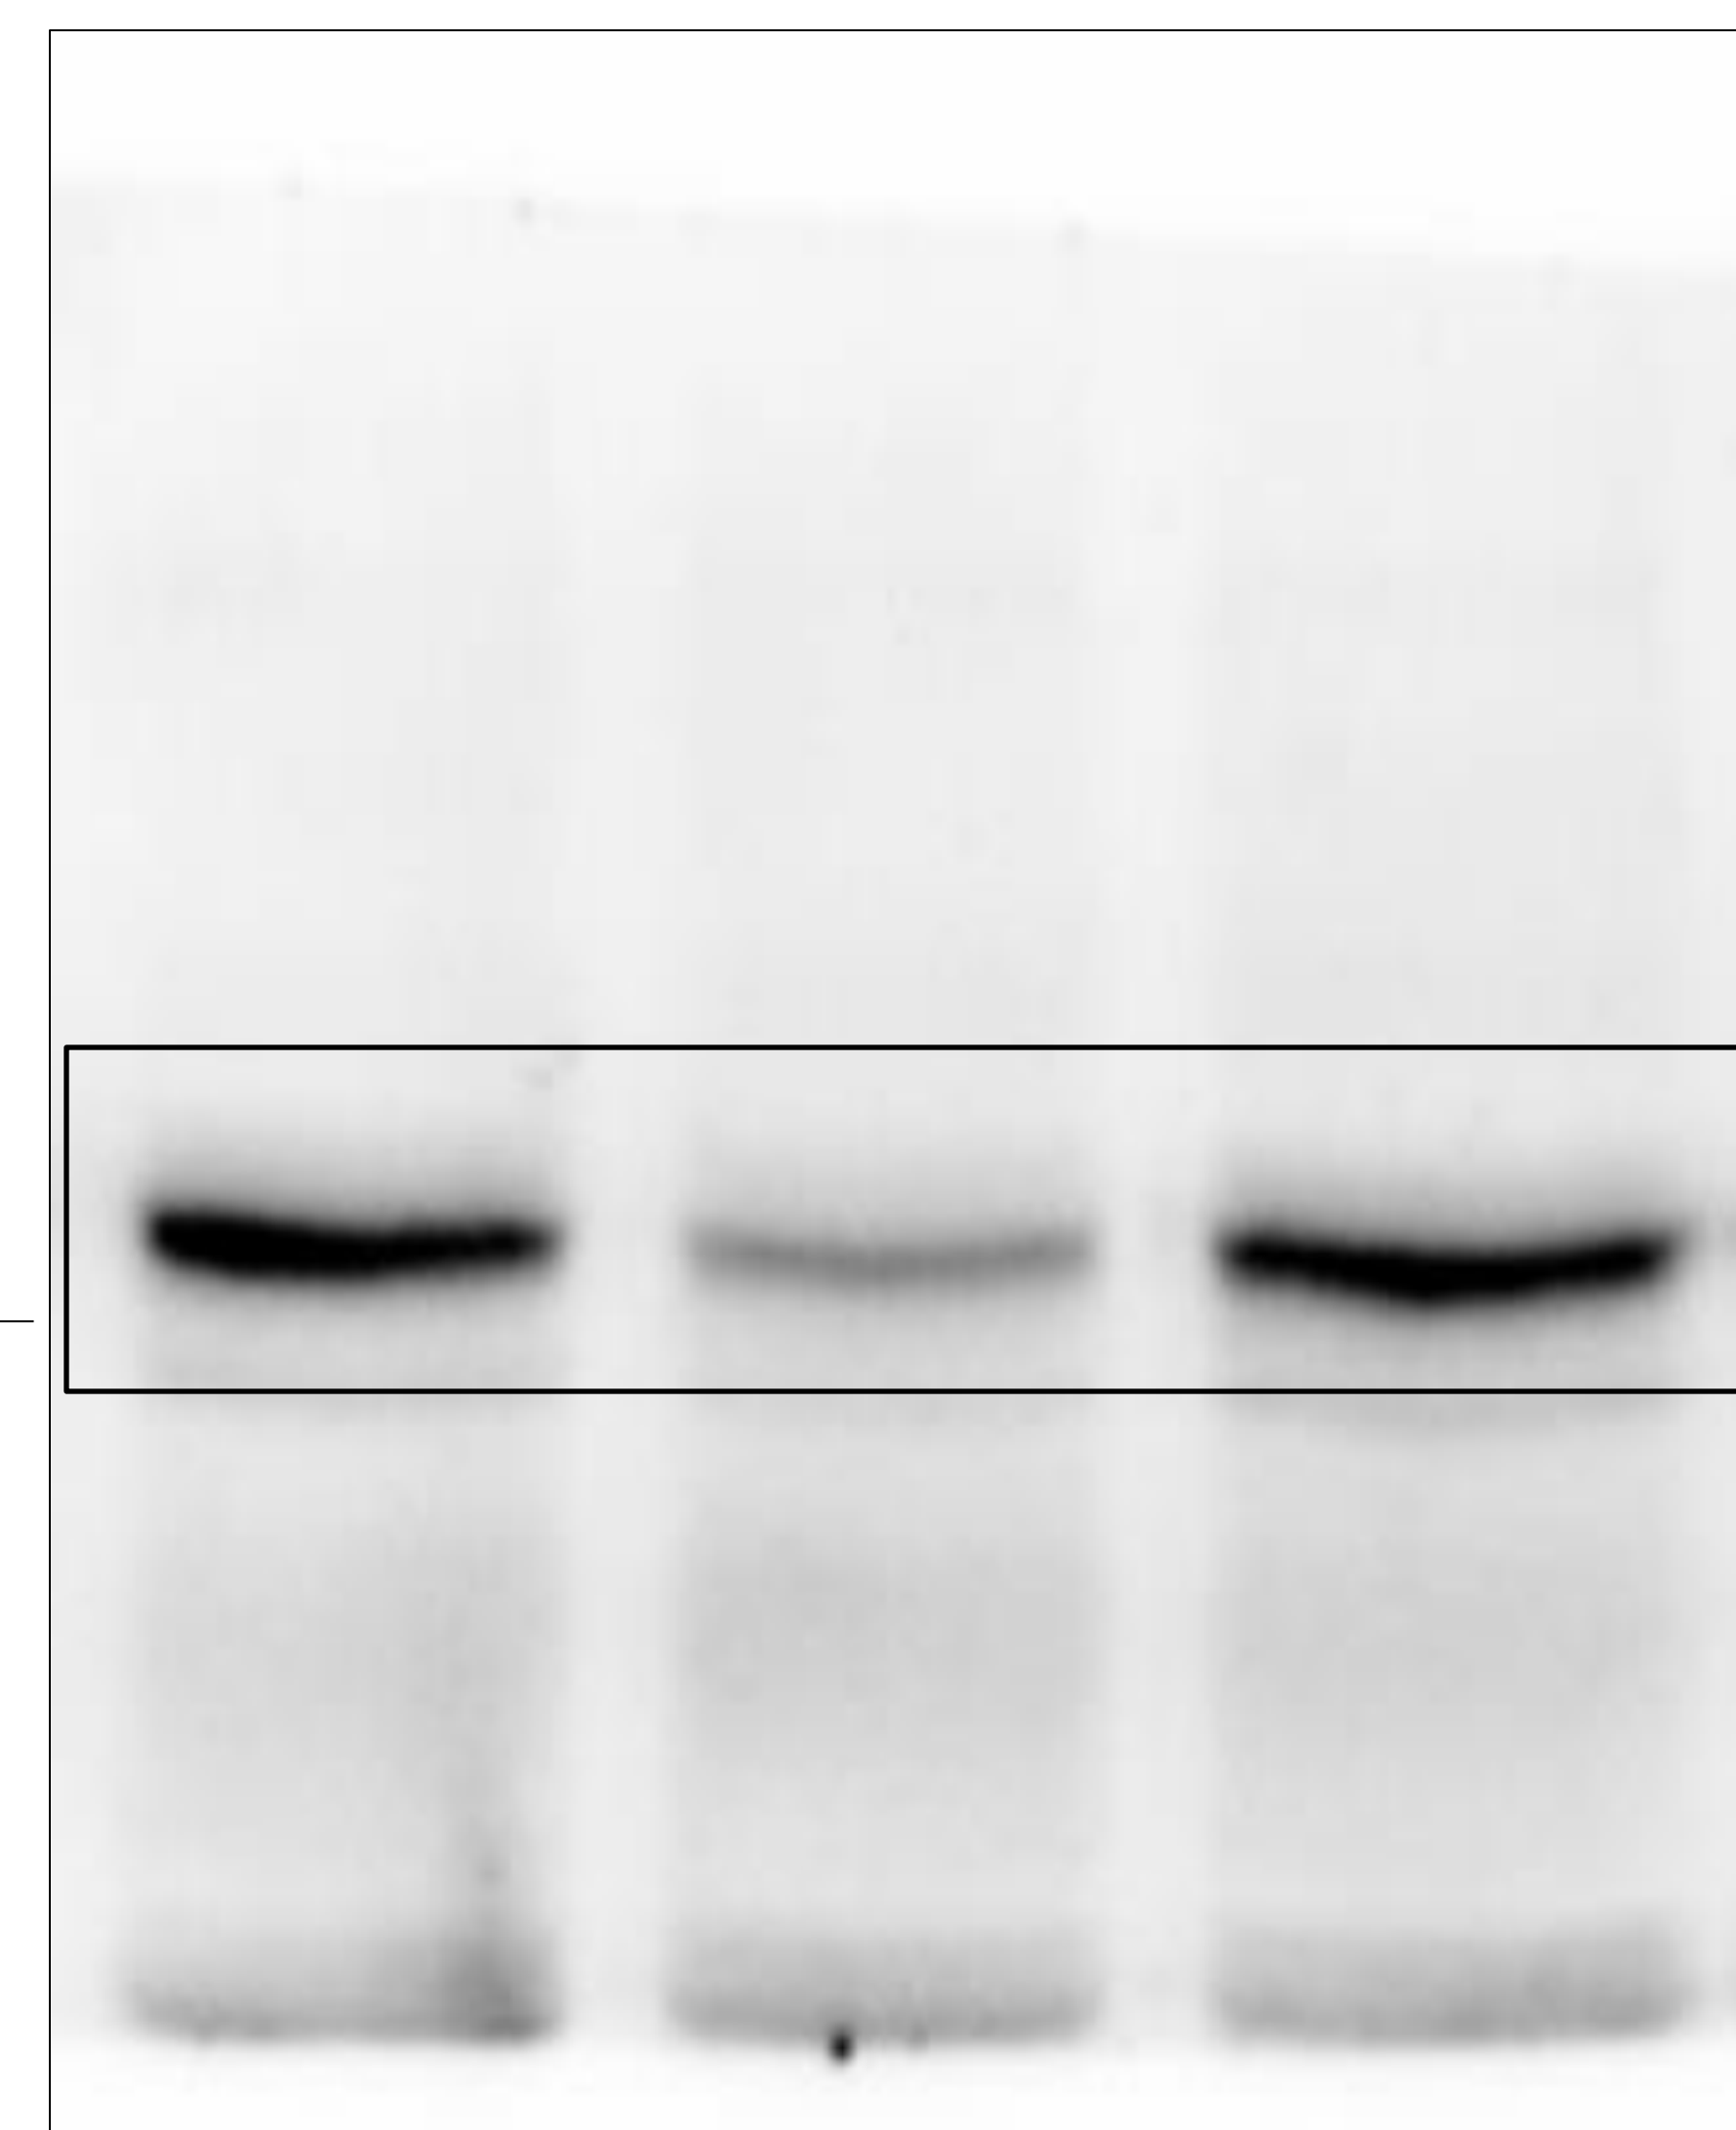

tSTAT3

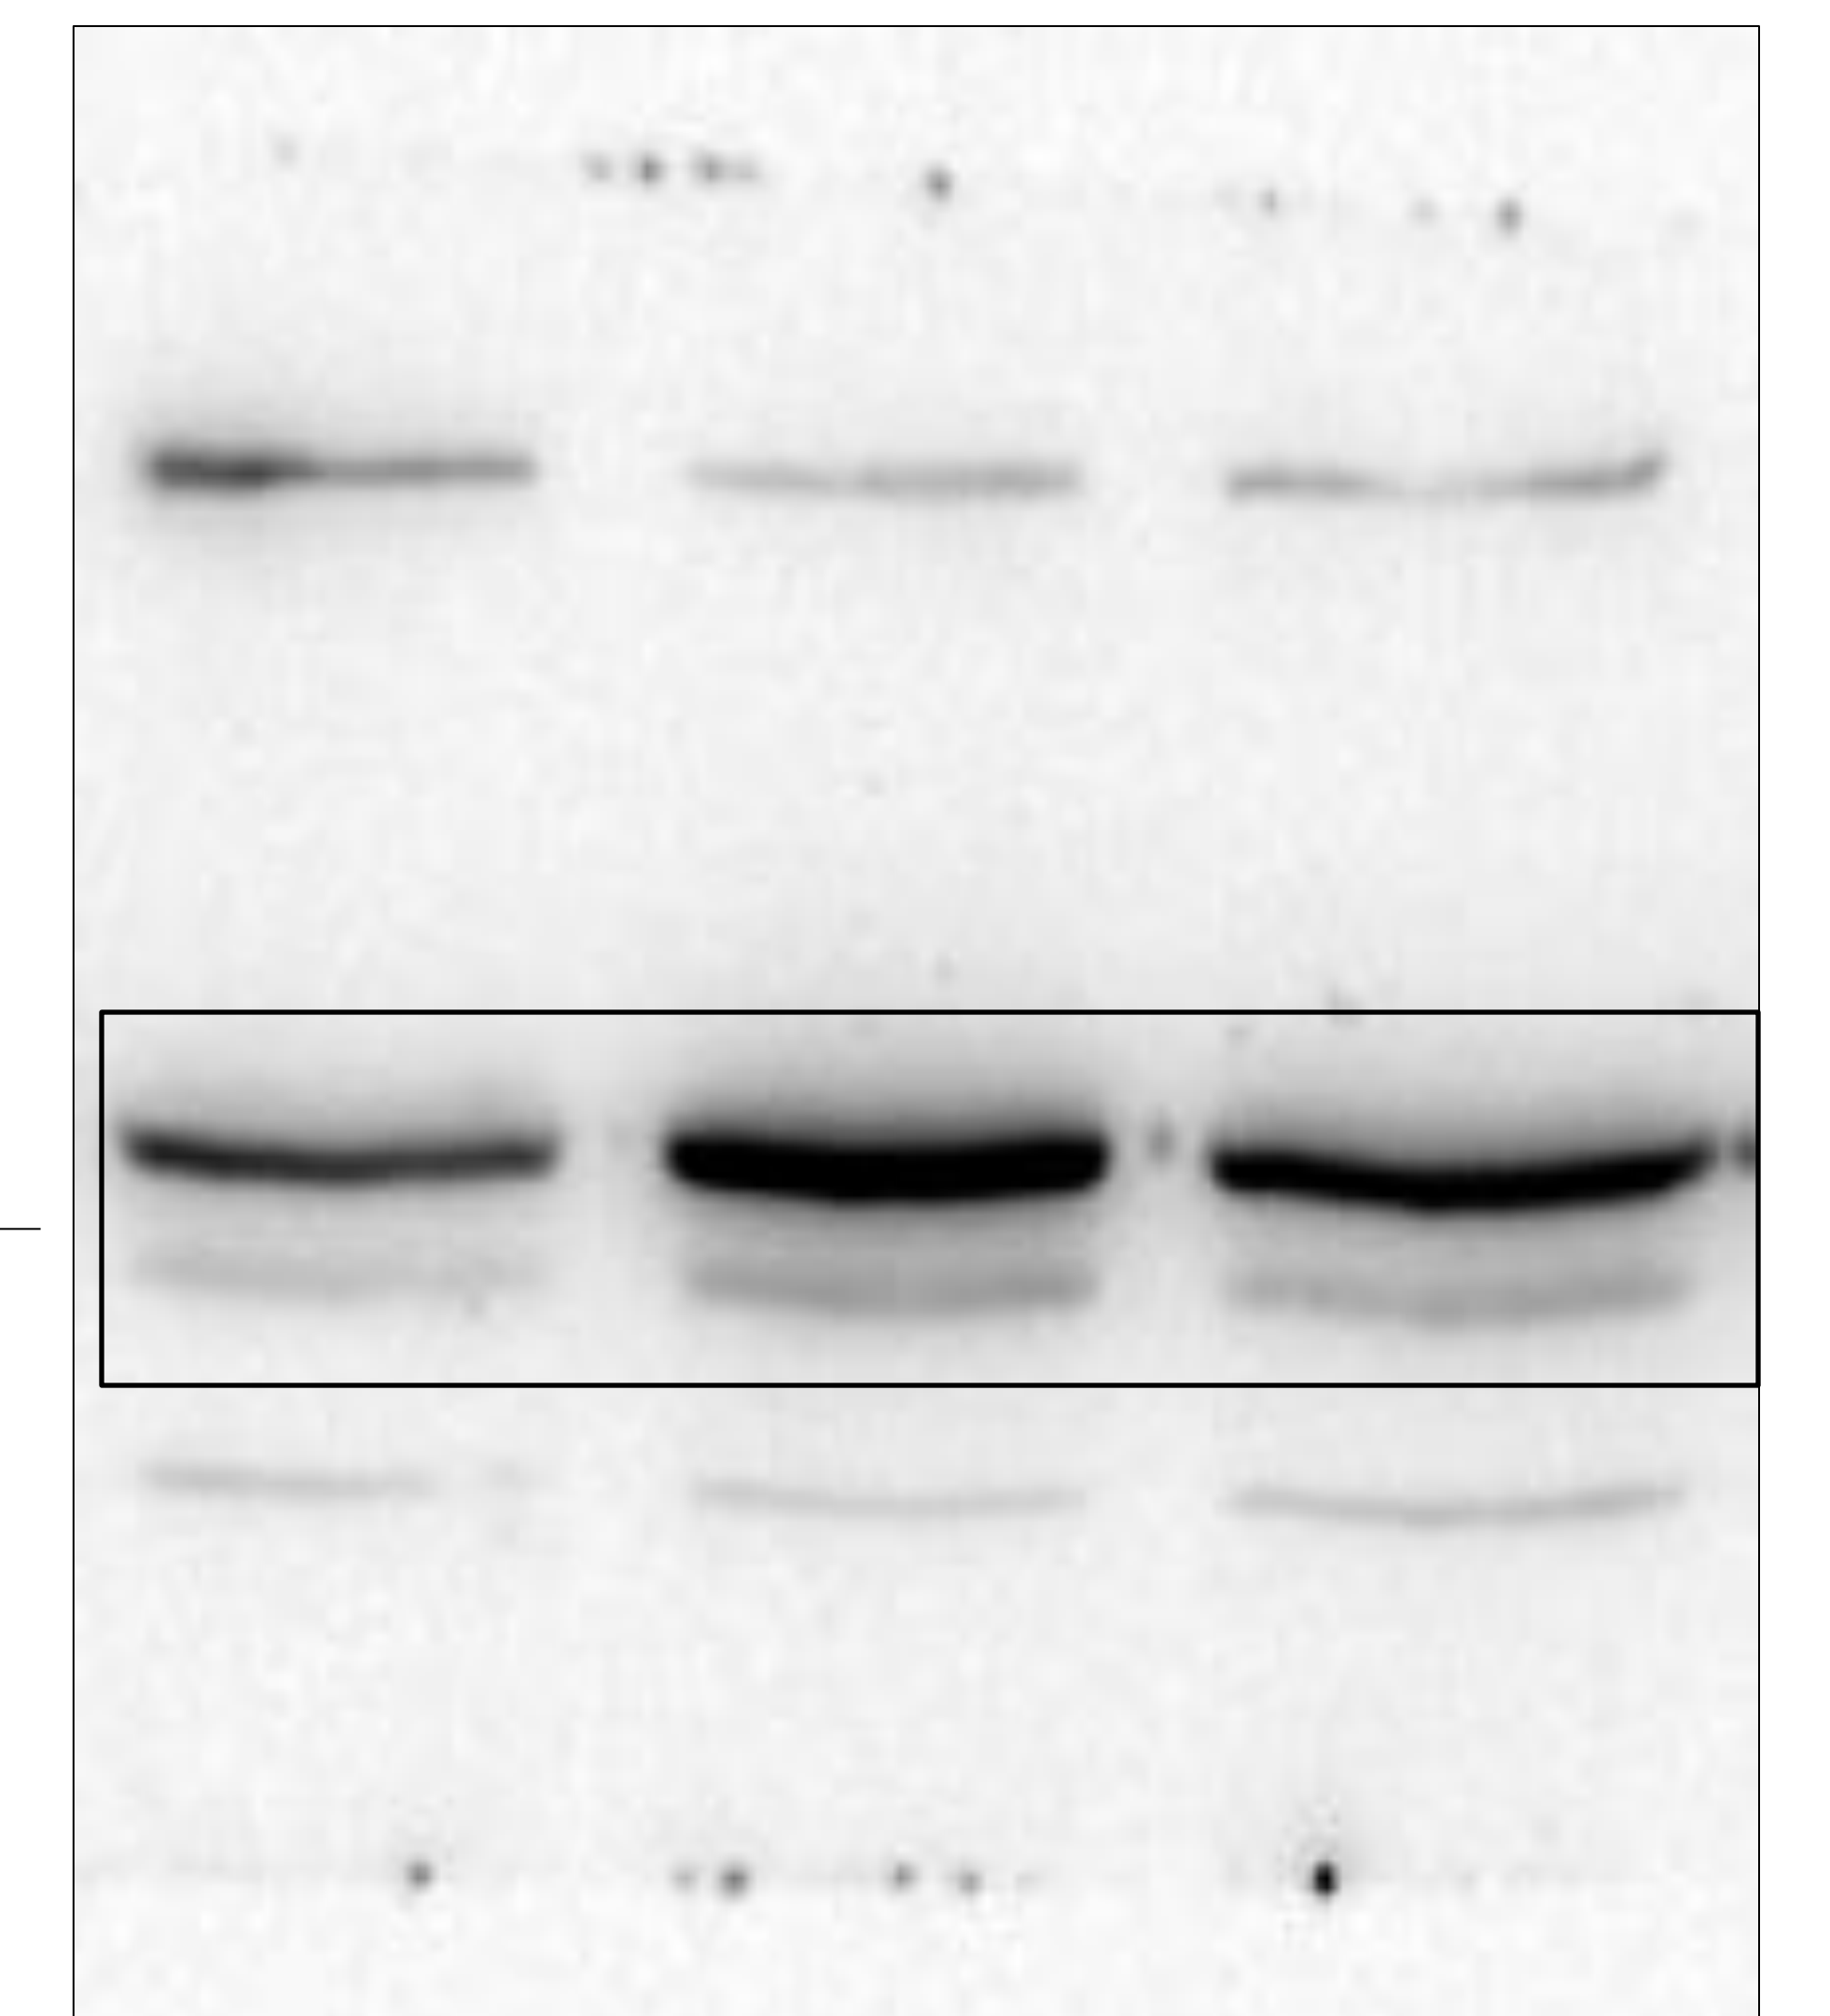

$\beta$ -actin

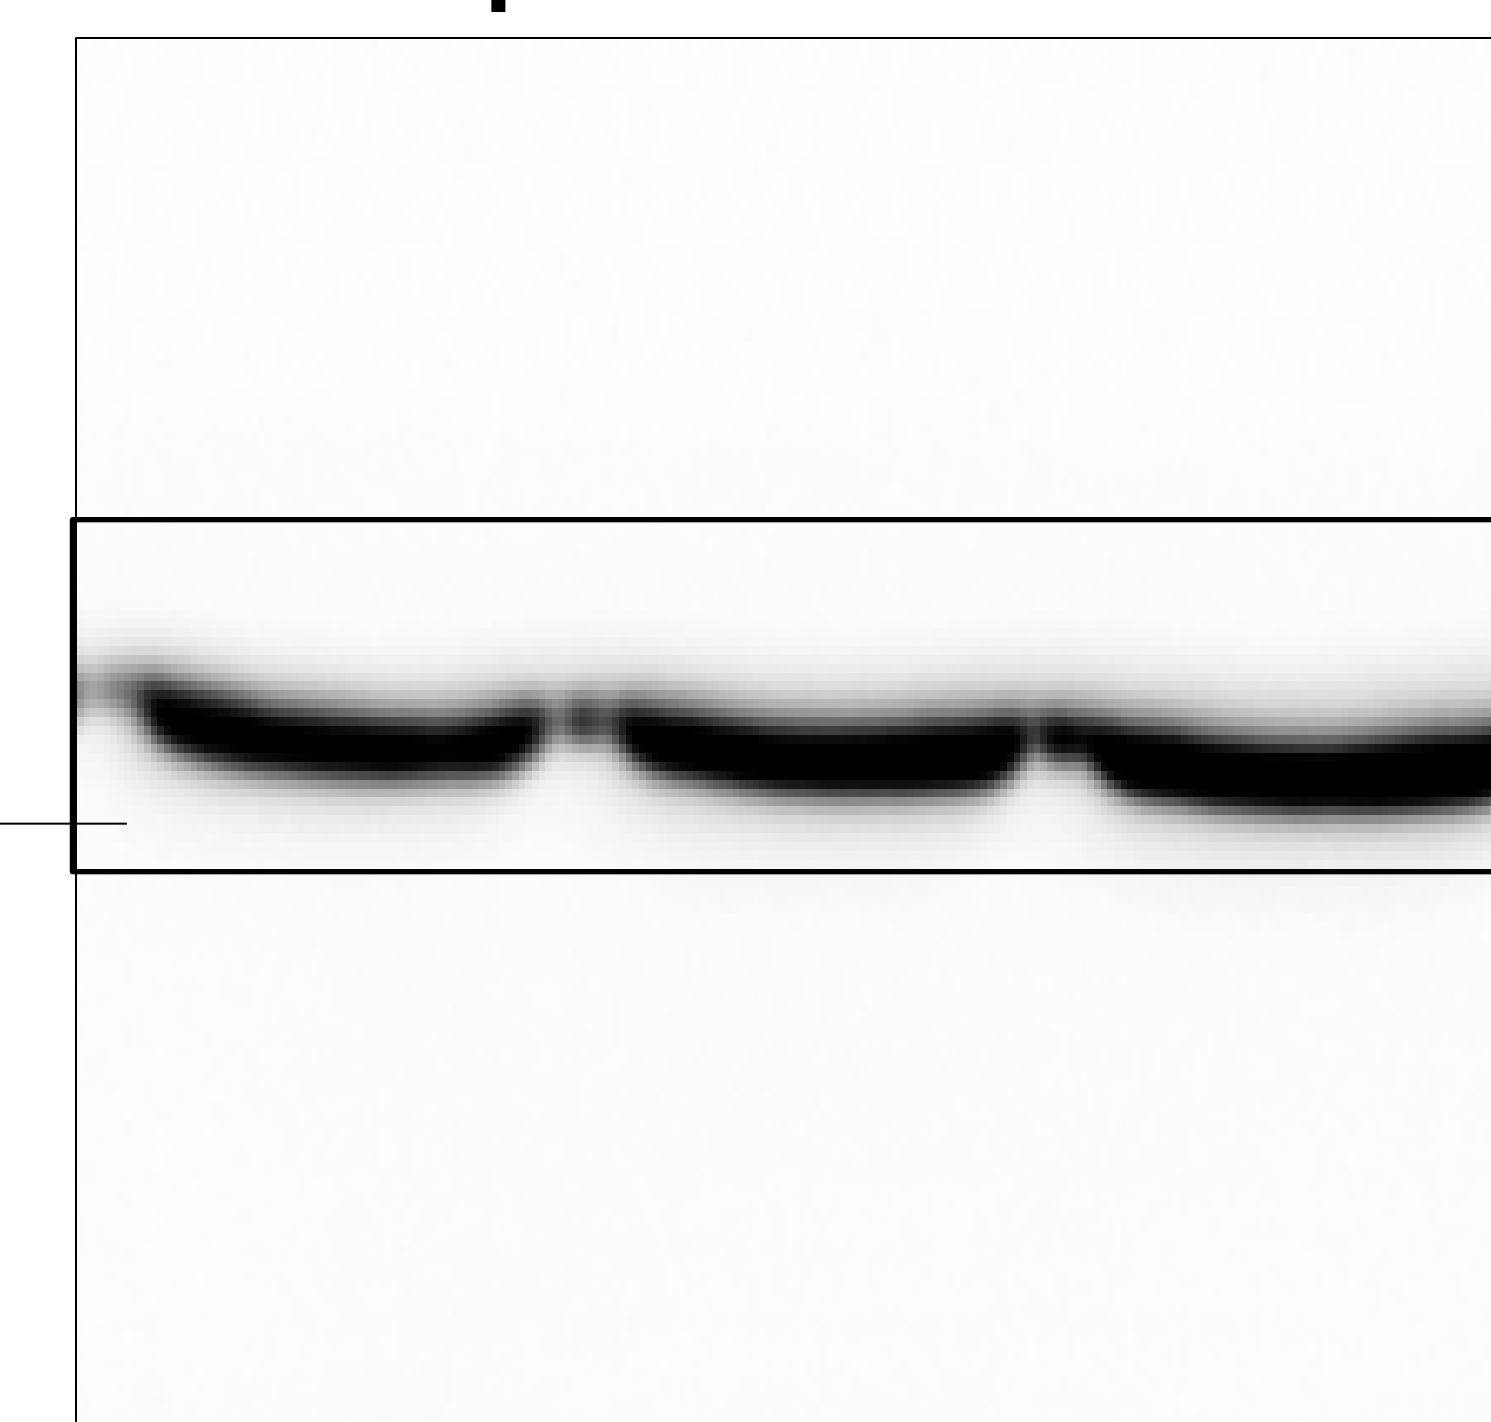

Figure 8F

Hepcidin

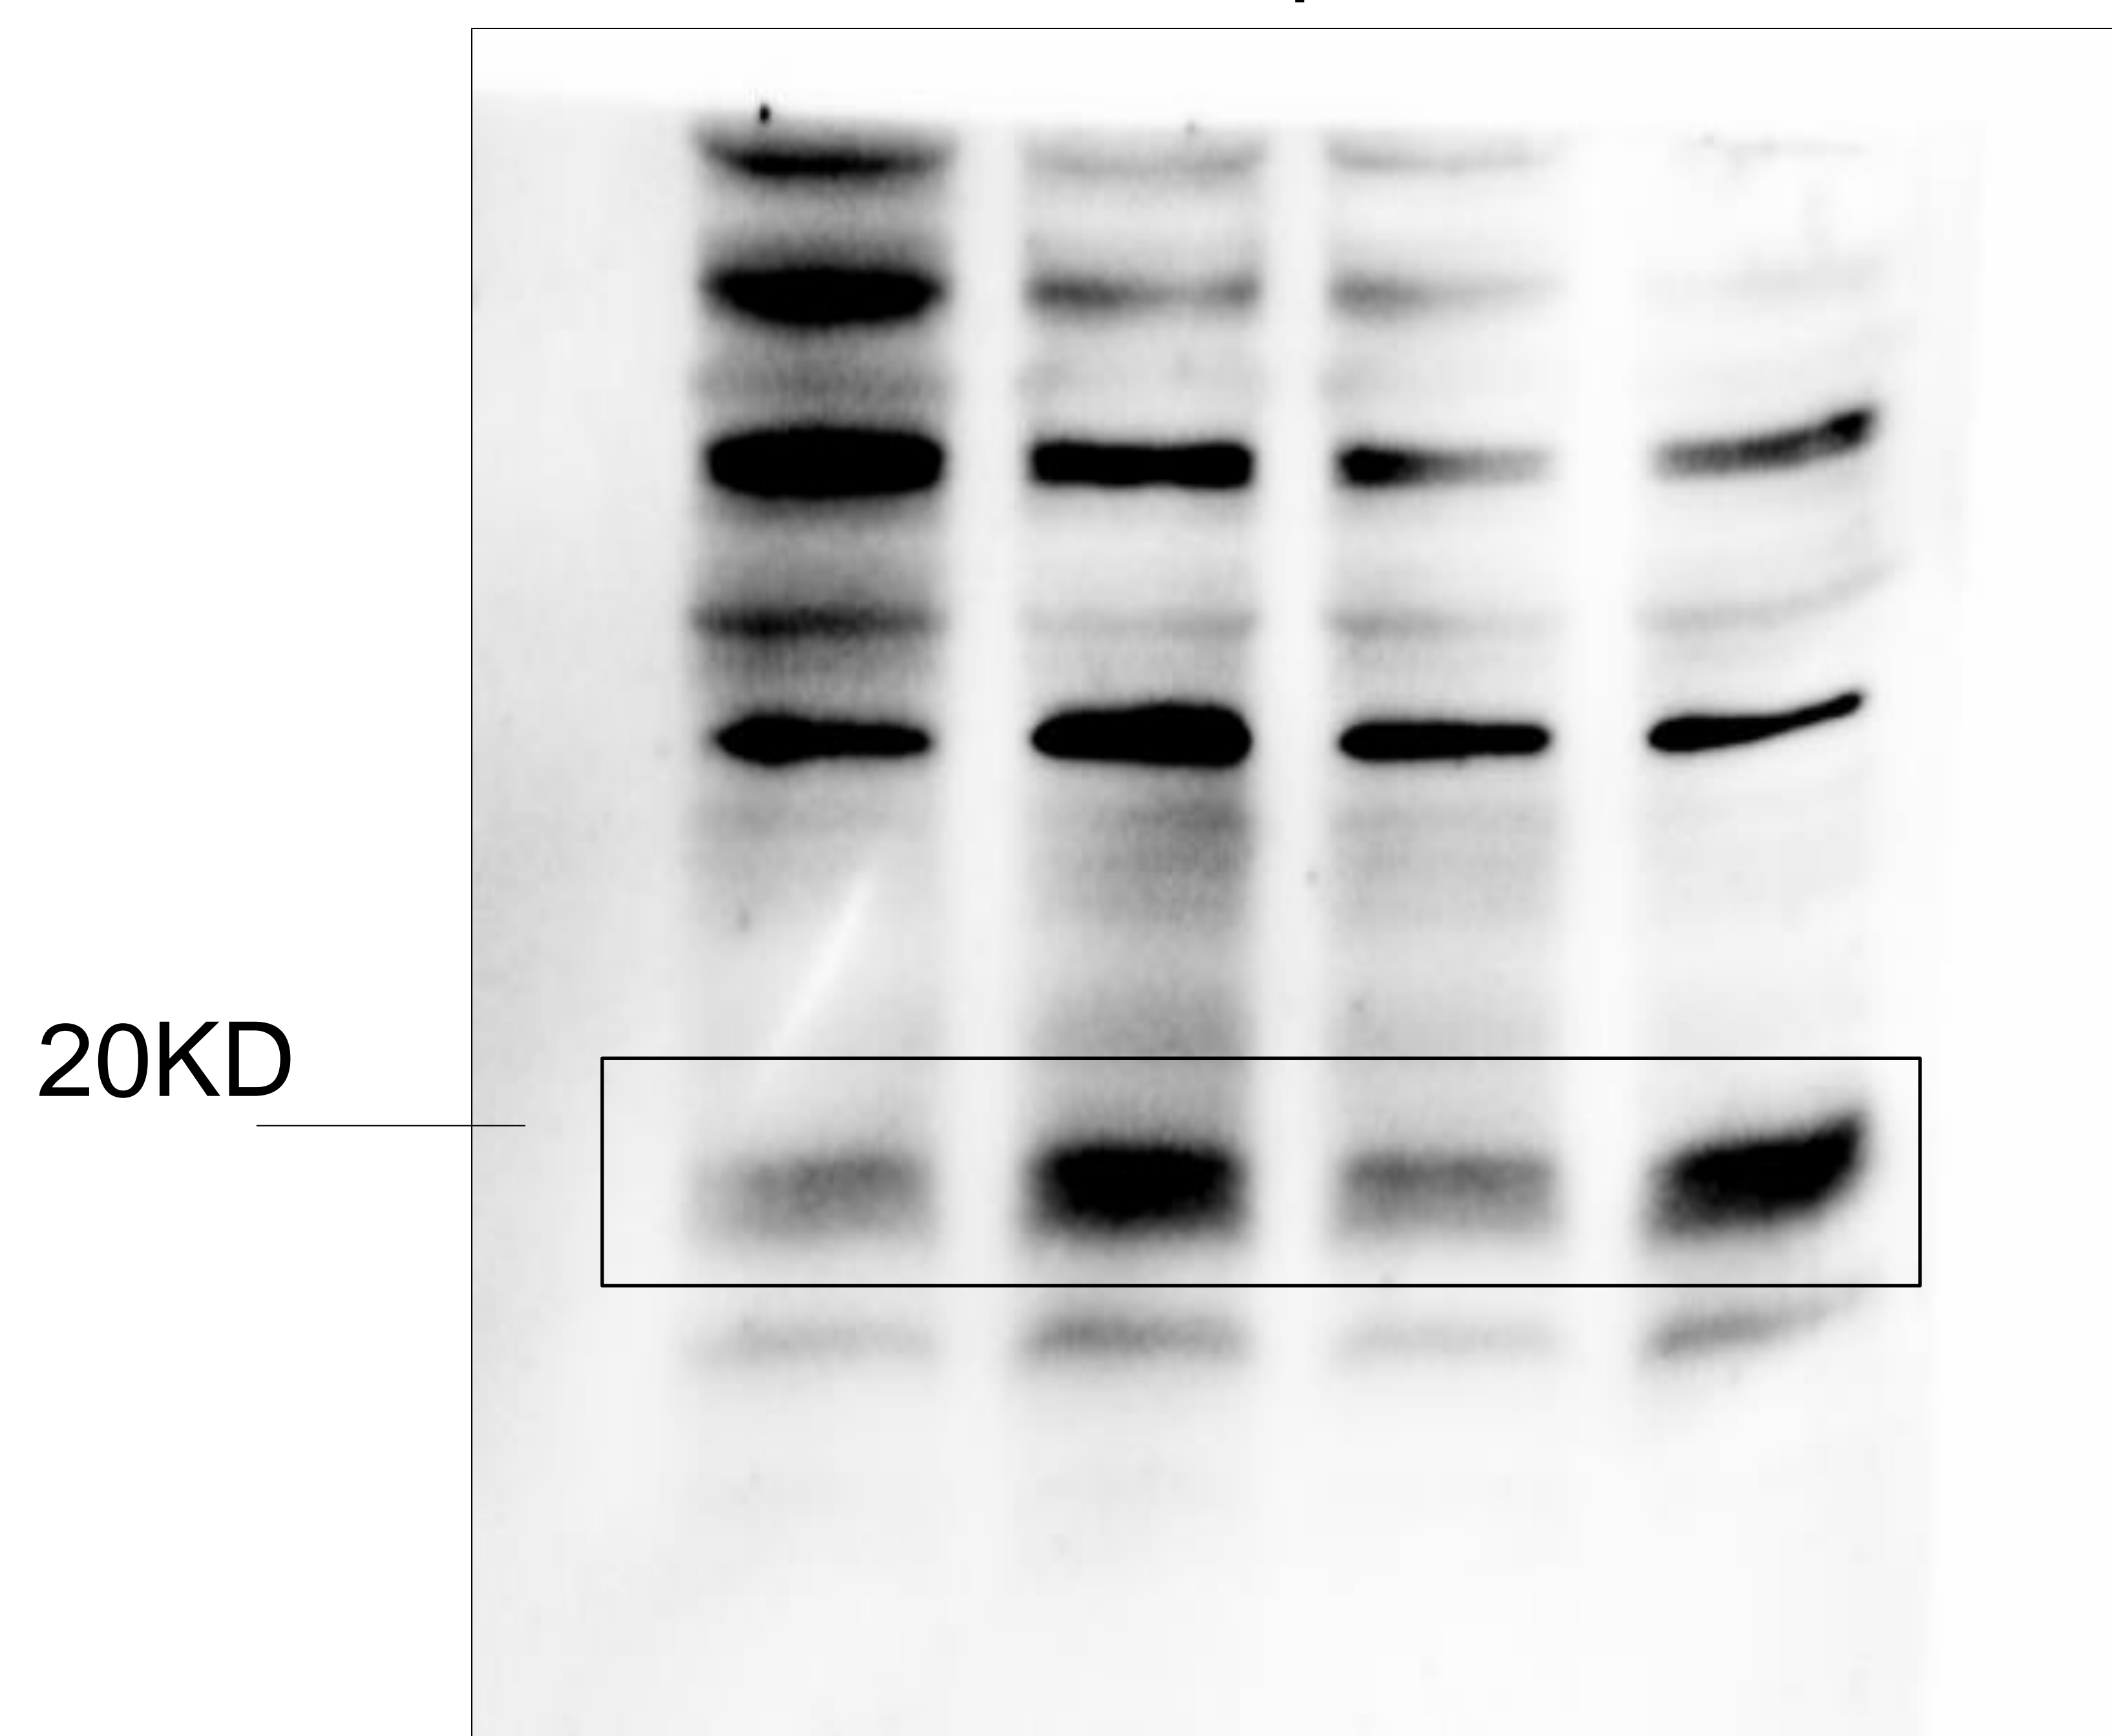

Cyclophilin B

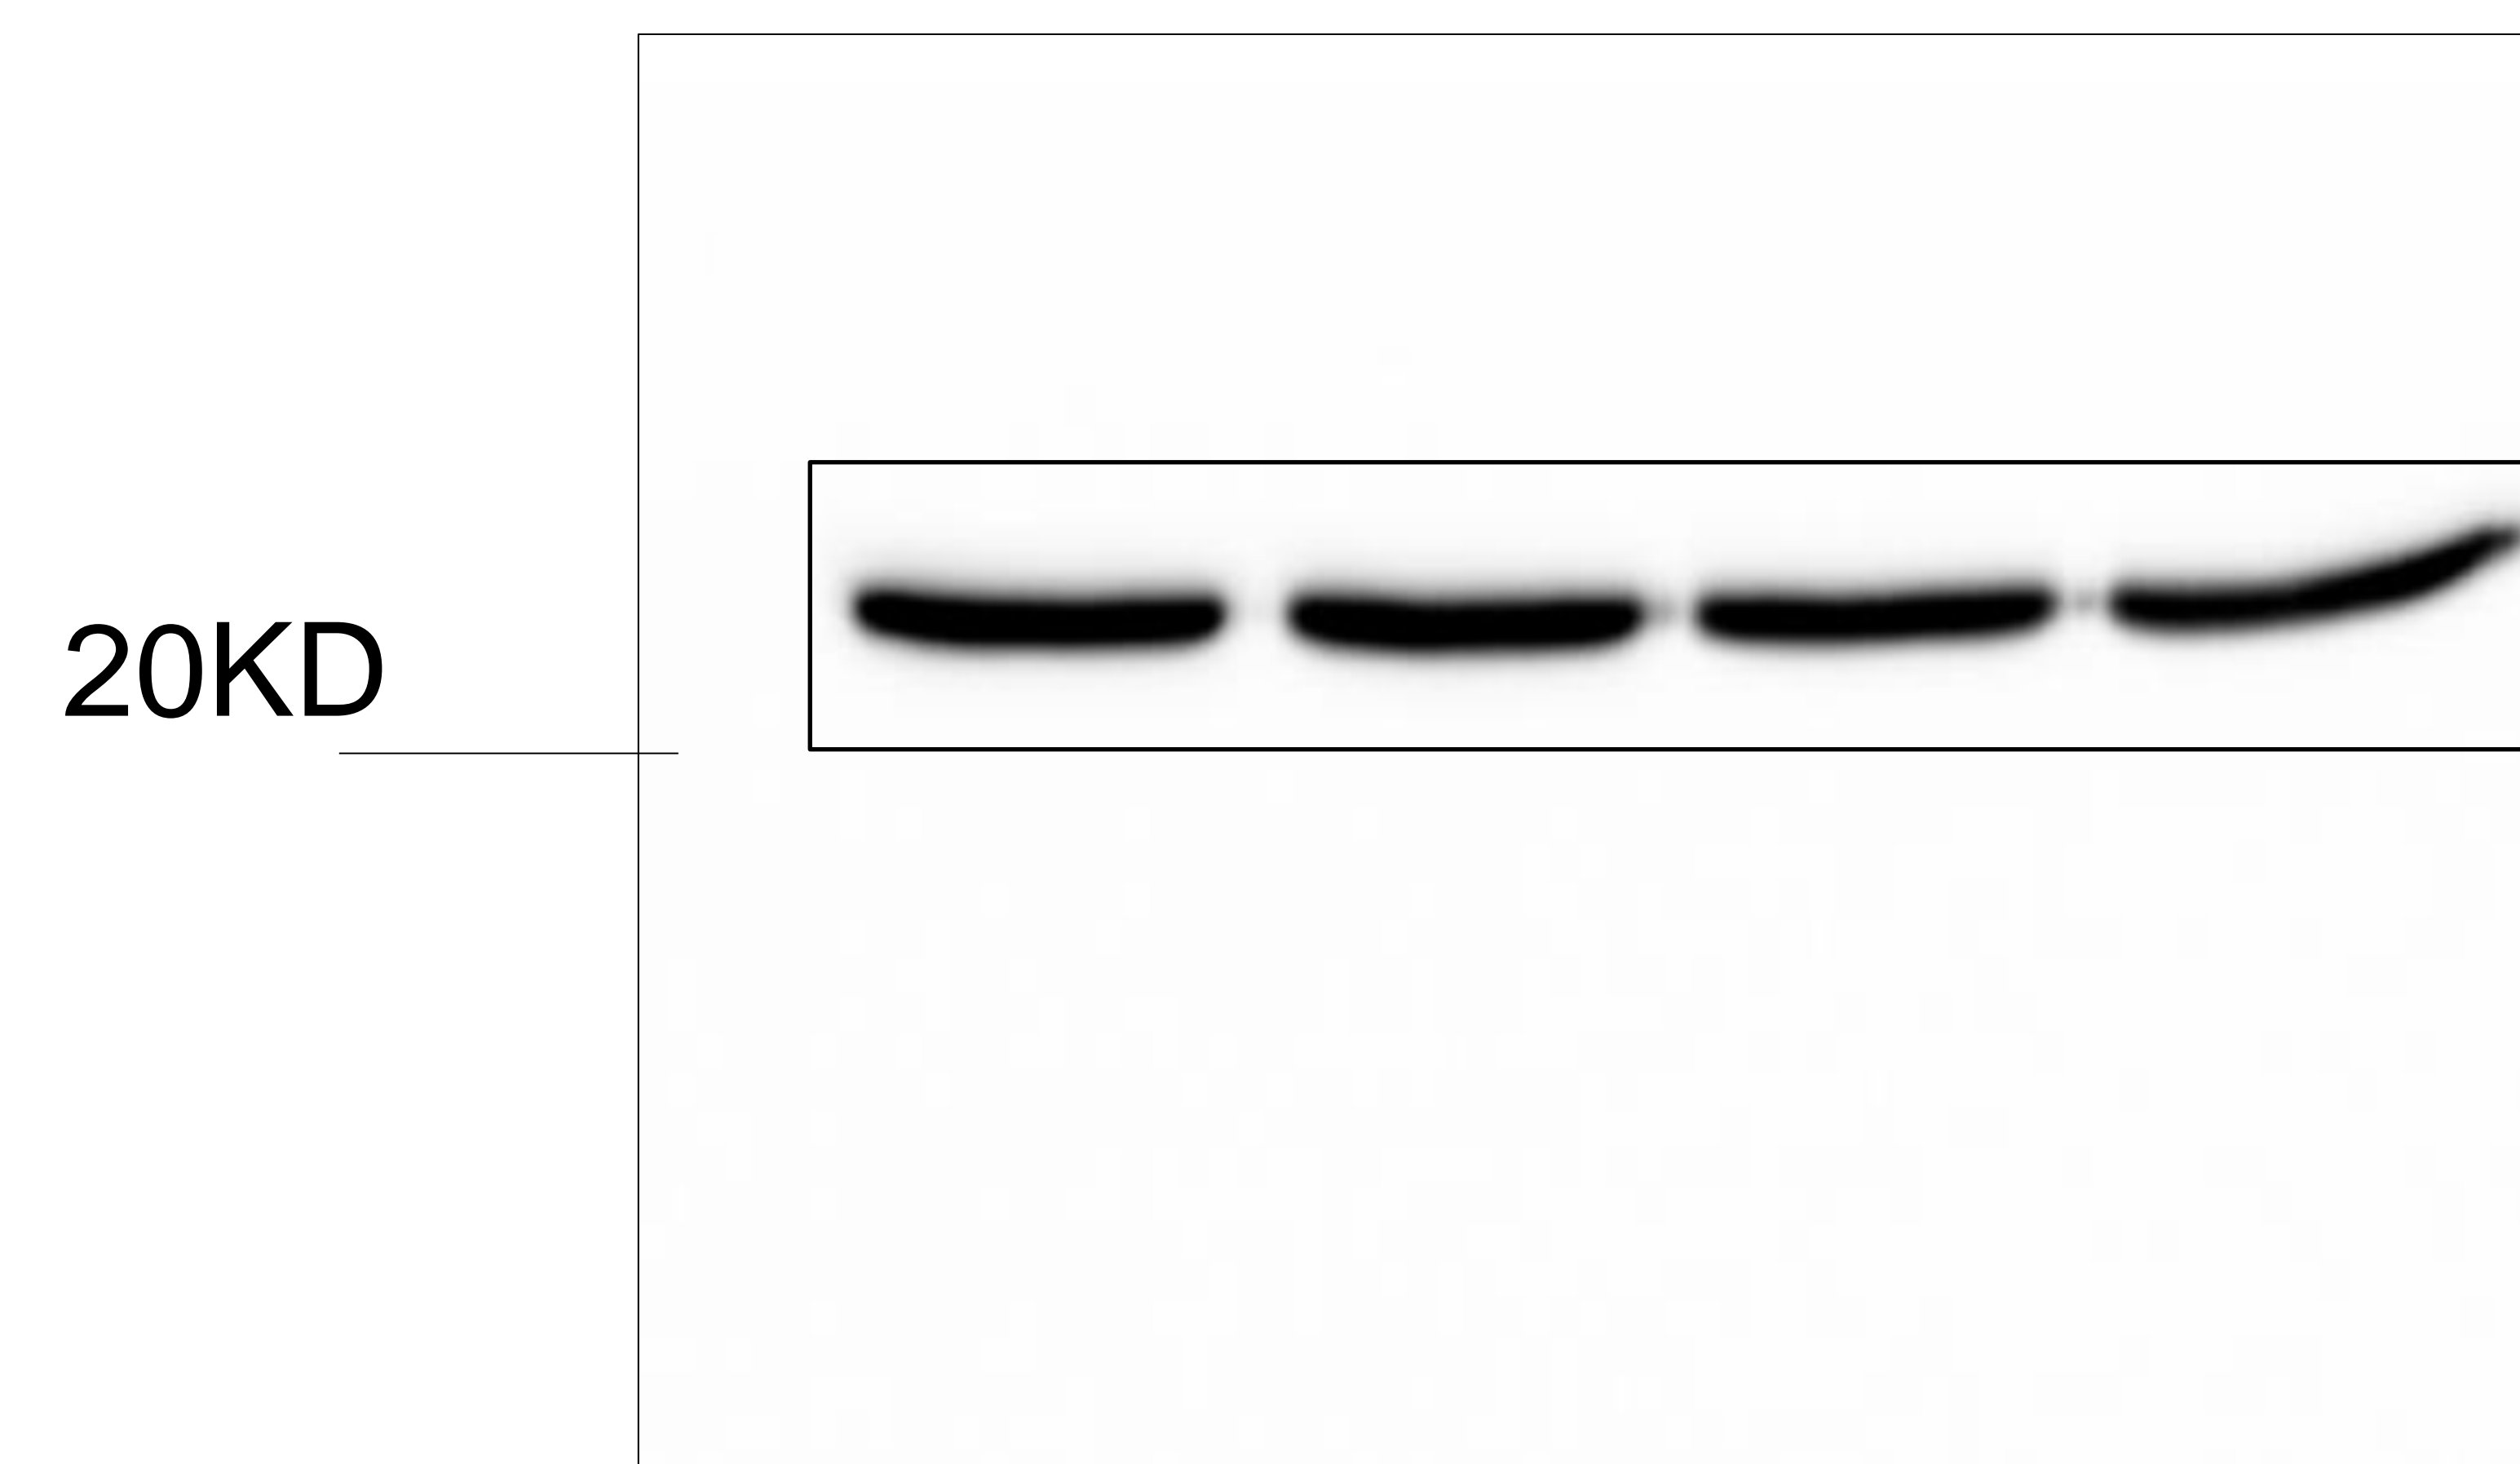

Supplement: NIHMS949317-supplement-13.pdf [file NIHMS949317-supplement-13.pdf]
